# Supplementary material for: Integrating compositional and functional content to describe vaginal microbiomes in health and disease
Source: Microbiome. 2023 Nov 30;11:259. doi: 10.1186/s40168-023-01692-x (PMC10688475; doi:10.1186/s40168-023-01692-x)
Supplement: Supplementary file 2 — Additional file 1: Figure S1. Metagenomic CST assignments correspond to marker gene-based CST assignments primarily through the predominant taxon. However, dominance by an mgSs is not captured through marker-based CSTs. Figure S2. A) For some species, mgSs assignment was significantly associated with sequencing depth of a sample (see Table S4). B) When only samples with ≥ 5.5e5 reads are used in mgSs classifier random forest tree construction, mgSs assignment is no longer significantly associated with depth of sequencing. C) For each species, 10-fold cross-validation yielded random forest misclassification error estimates. Figure S3. A) MgSs assignment using hierarchical clustering (y-axis) are highly concordant (kappa> 0.8) with those assigned by the random forest classifier (x-axis) for that species. B) MgCST assignment using hierarchical clustering (x-axis) are highly concordant (kappa= 0.78) with those assigned by the nearest centroid classifier (y-axis). Figure S4. Confusion matrix and classification error estimates from 10-fold cross-validation of a nearest-centroid classifier for mgCSTs. Figure S5. Gene presence heatmaps for all species for which mgSs were constructed. Samples with >75% estimated median number of genes encoded in reference genomes from the Genome Taxonomy Database [63], see Table S3) were used to build mgSs. In each heatmap, samples are in the columns and genes are in the rows. Assigned mgSs are indicated in the column side colors at the top. Gene clusters are colored for each gene on the y-axis. The bottom x-axis indicates Amsel-BV diagnoses, if clinical evaluation data were available for the sample. Dendrograms were built using Ward linkage of Jaccard distances. Figure S10. Metagenomic subspecies (a, mgSs) and metagenomic community state types (b, mgCSTs) may be impacted with sampling (sequencing) depth. A minimum of 1 x 106 reads per sample is recommended for mgCST assignment. [file 40168_2023_1692_MOESM1_ESM.pdf]

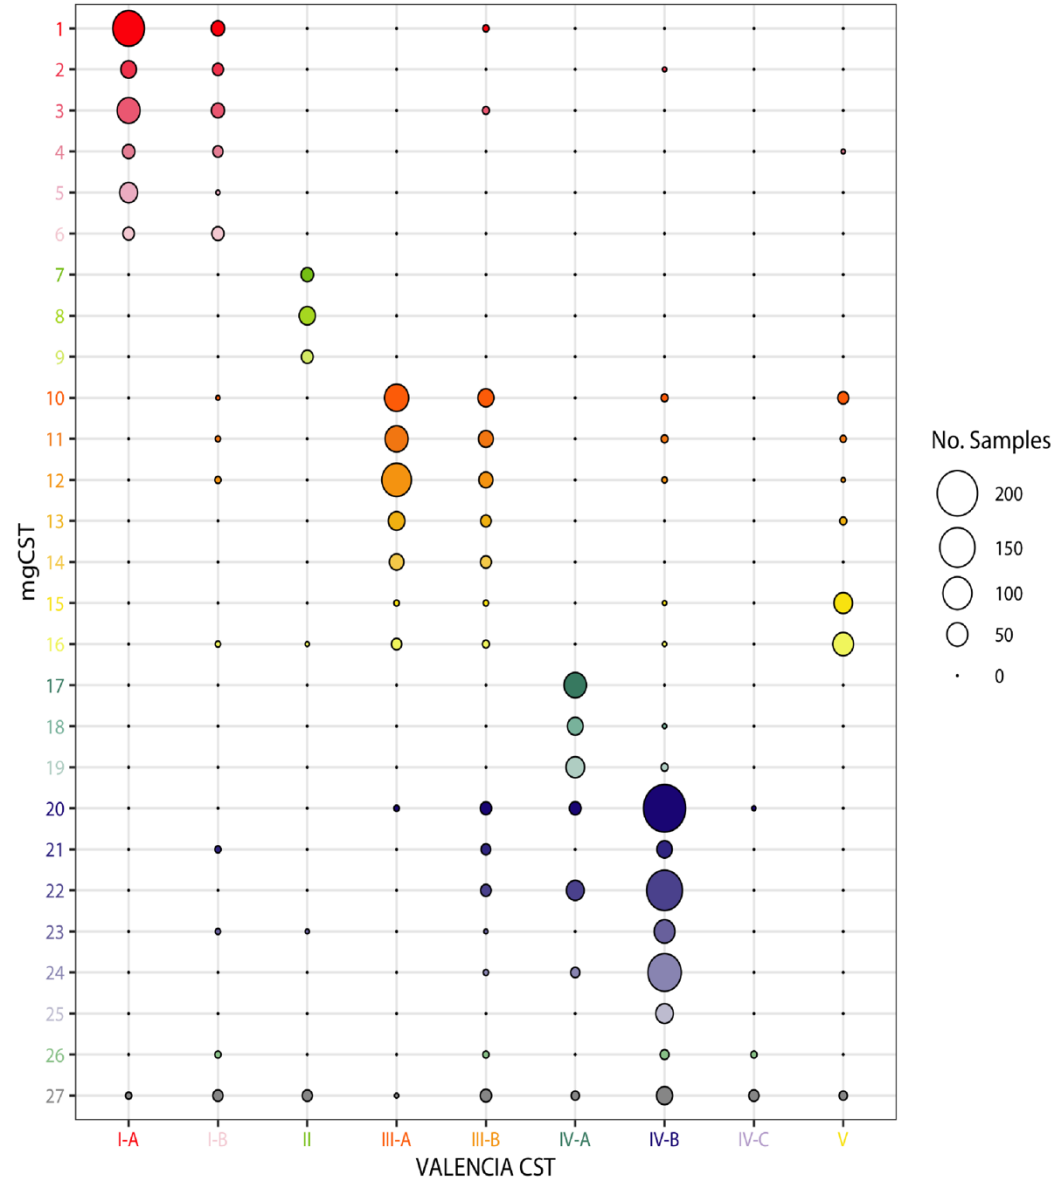

Fig. S1. Metagenomic CST assignments correspond to marker gene-based CST assignments primarily through the predominant taxon. However, dominance by an mgSs is not captured through marker-based CSTs.

Species with significant dependence of mgSs assignment on log10-transformed sequencing coverage  
(All samples)

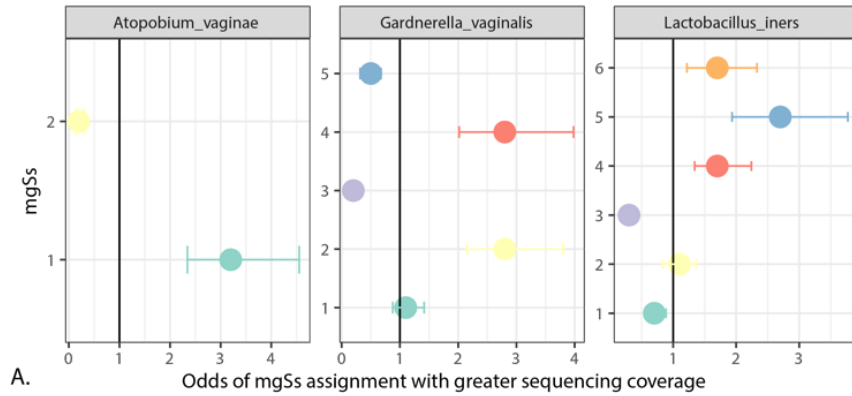

Species with significant dependence of mgSs assignment on log10-transformed sequencing coverage  
(Only samples  $\geq 5.5 \times 10^5$  reads)

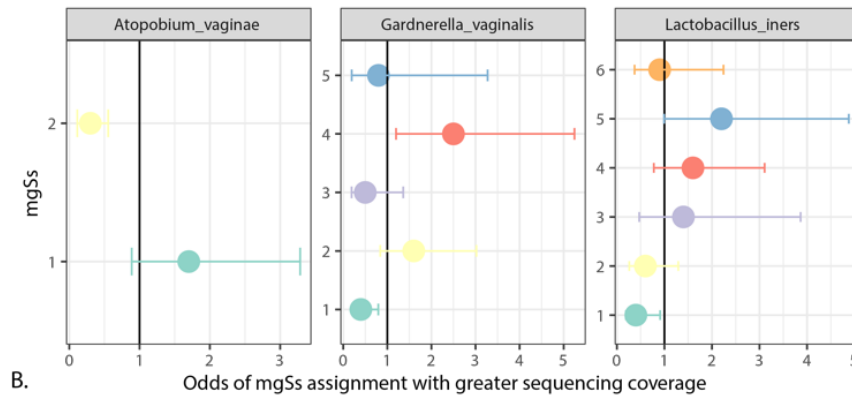

C.

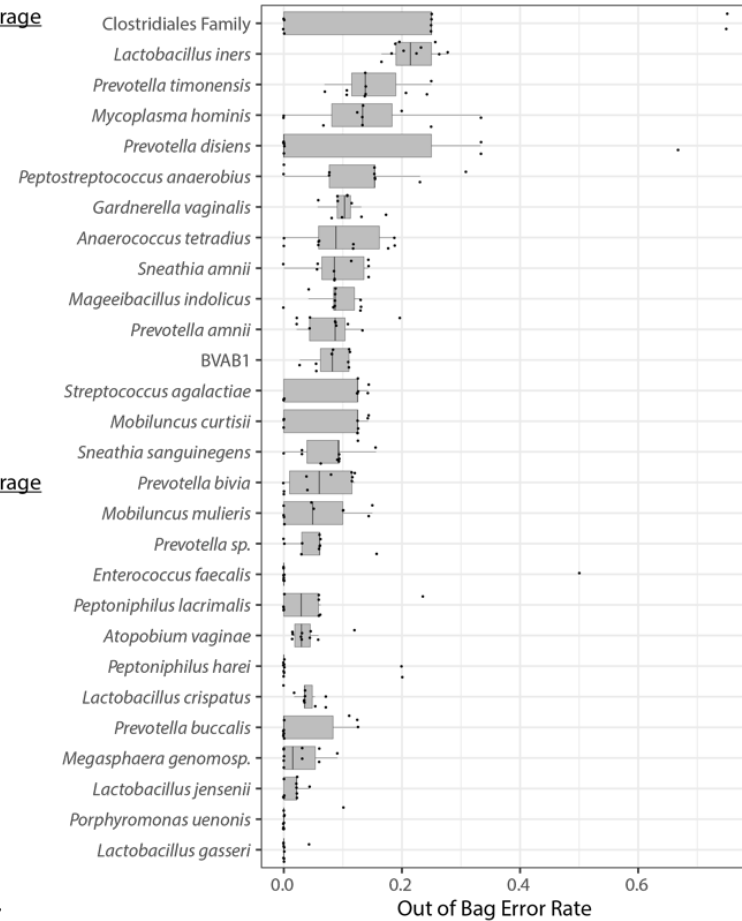

Fig. S2. A) For some species, mgSs assignment was significantly associated with sequencing depth of a sample (see Table S4). B) When only samples with  $\geq 5.5 \times 10^5$  reads are used in mgSs classifier random forest tree construction, mgSs assignment is no longer significantly associated with depth of sequencing. C) For each species, 10-fold cross-validation yielded random forest misclassification error estimates.

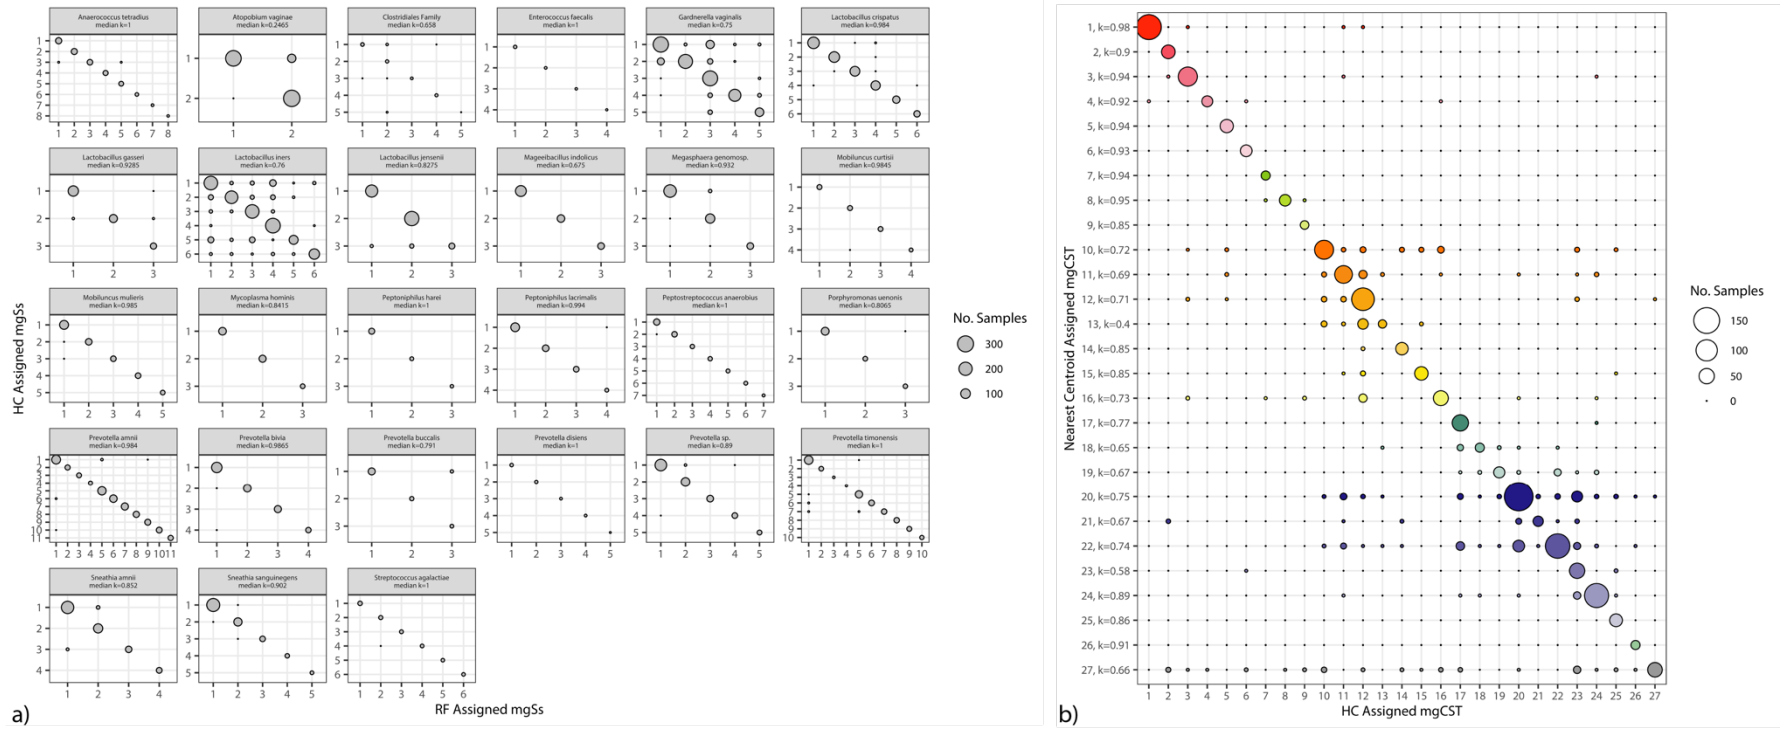

Figure S3. A) MgSs assignment using hierarchical clustering (y-axis) are highly concordant ( $\kappa > 0.8$ ) with those assigned by the random forest classifier (x-axis) for that species. B) MgCST assignment using hierarchical clustering (x-axis) are highly concordant ( $\kappa = 0.78$ ) with those assigned by the nearest centroid classifier (y-axis).

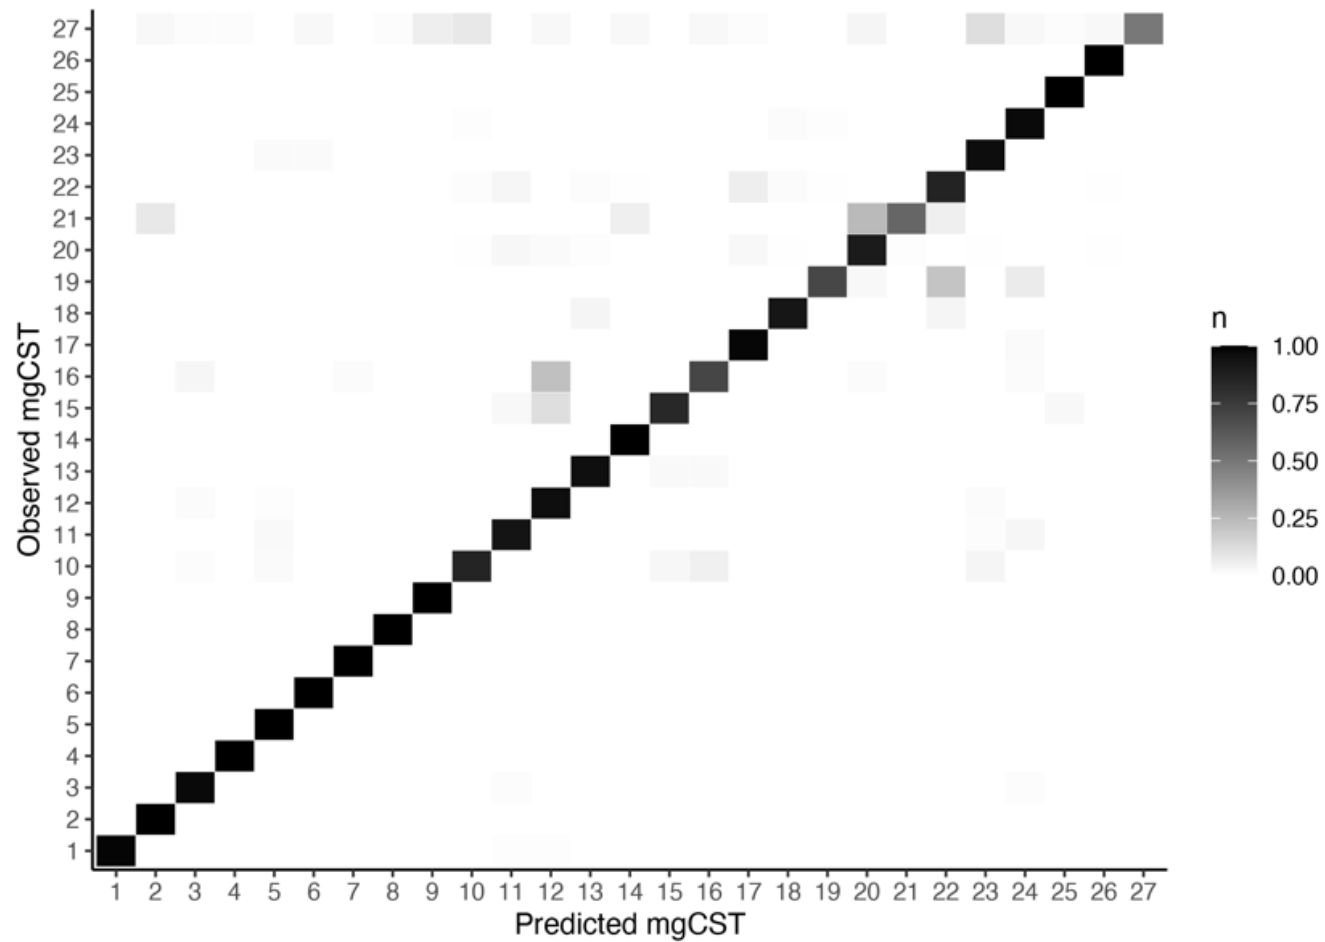

Fig. S4. Confusion matrix and classification error estimates from 10-fold cross-validation of a nearest-centroid classifier for mgCSTs.

Fig. S5. Gene presence heatmaps for all species for which mgSs were constructed. Samples with >75% estimated median number of genes encoded in reference genomes from the Genome Taxonomy Database [64], see Table S3) were used to build mgSs. In each heatmap, samples are in the columns and genes are in the rows. Assigned mgSs are indicated in the column side colors at the top. Gene clusters are colored for each gene on the y-axis. The bottom x-axis indicates Amsel-BV diagnoses, if clinical evaluation data were available for the sample. Dendrograms were built using Ward linkage of Jaccard distances.

Anaerococcus tetradius mgSs  
Number of Samples=167, Number of Genes=2619

- mgSs 1
- mgSs 2
- mgSs 3
- mgSs 4
- mgSs 5
- mgSs 6
- mgSs 7
- mgSs 8

- Gene Clusters
- 1
  - 2
  - 3
  - 4
  - 5
  - 6
  - 7
  - 8
  - 9
  - 10

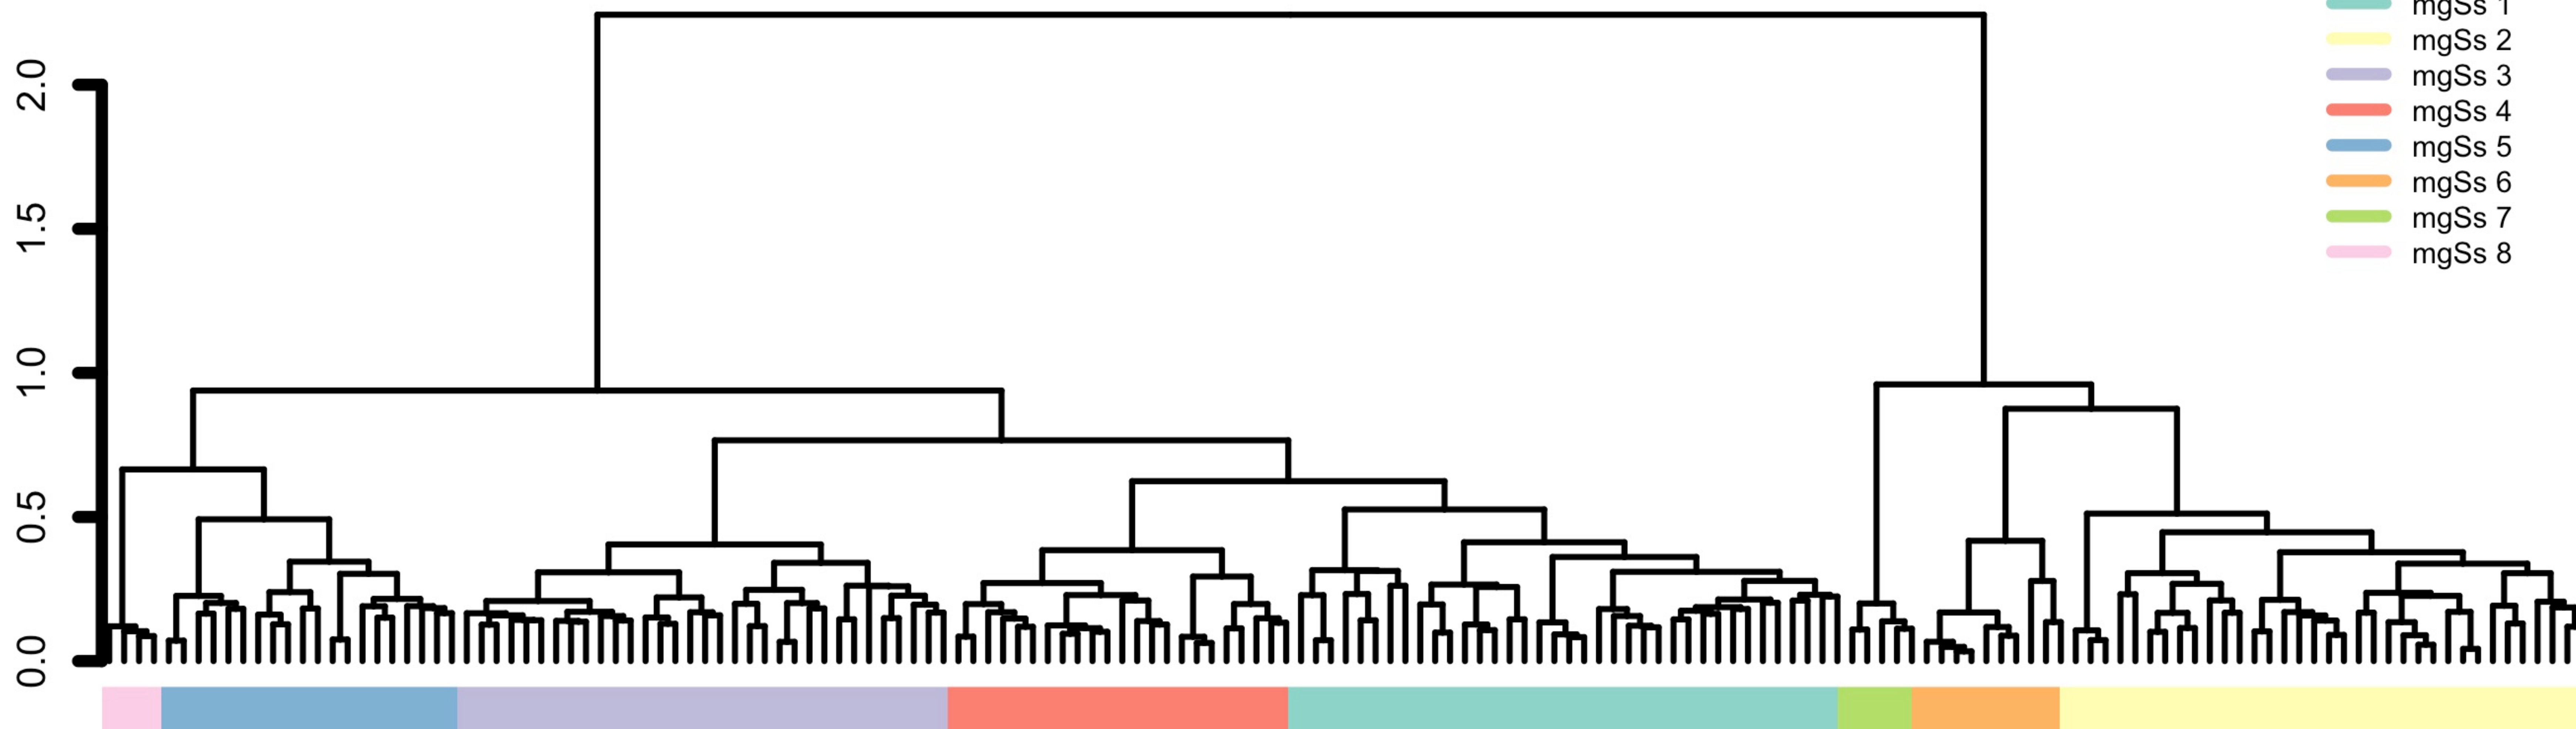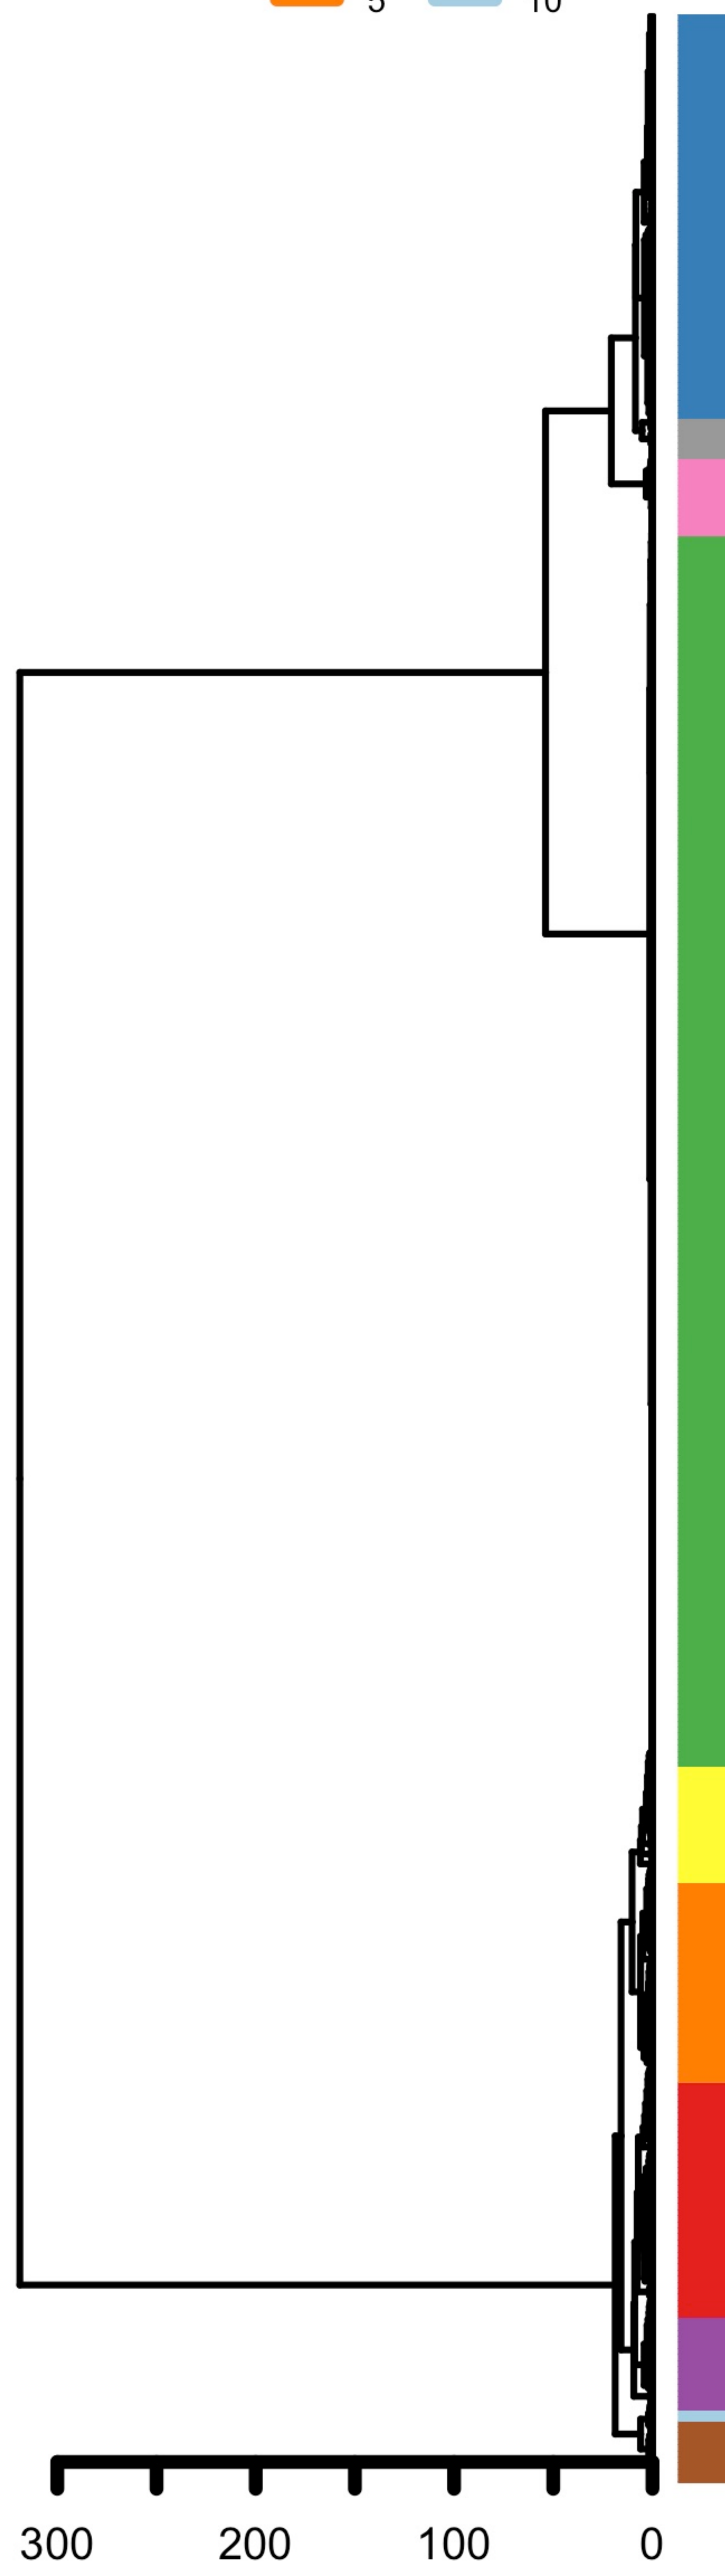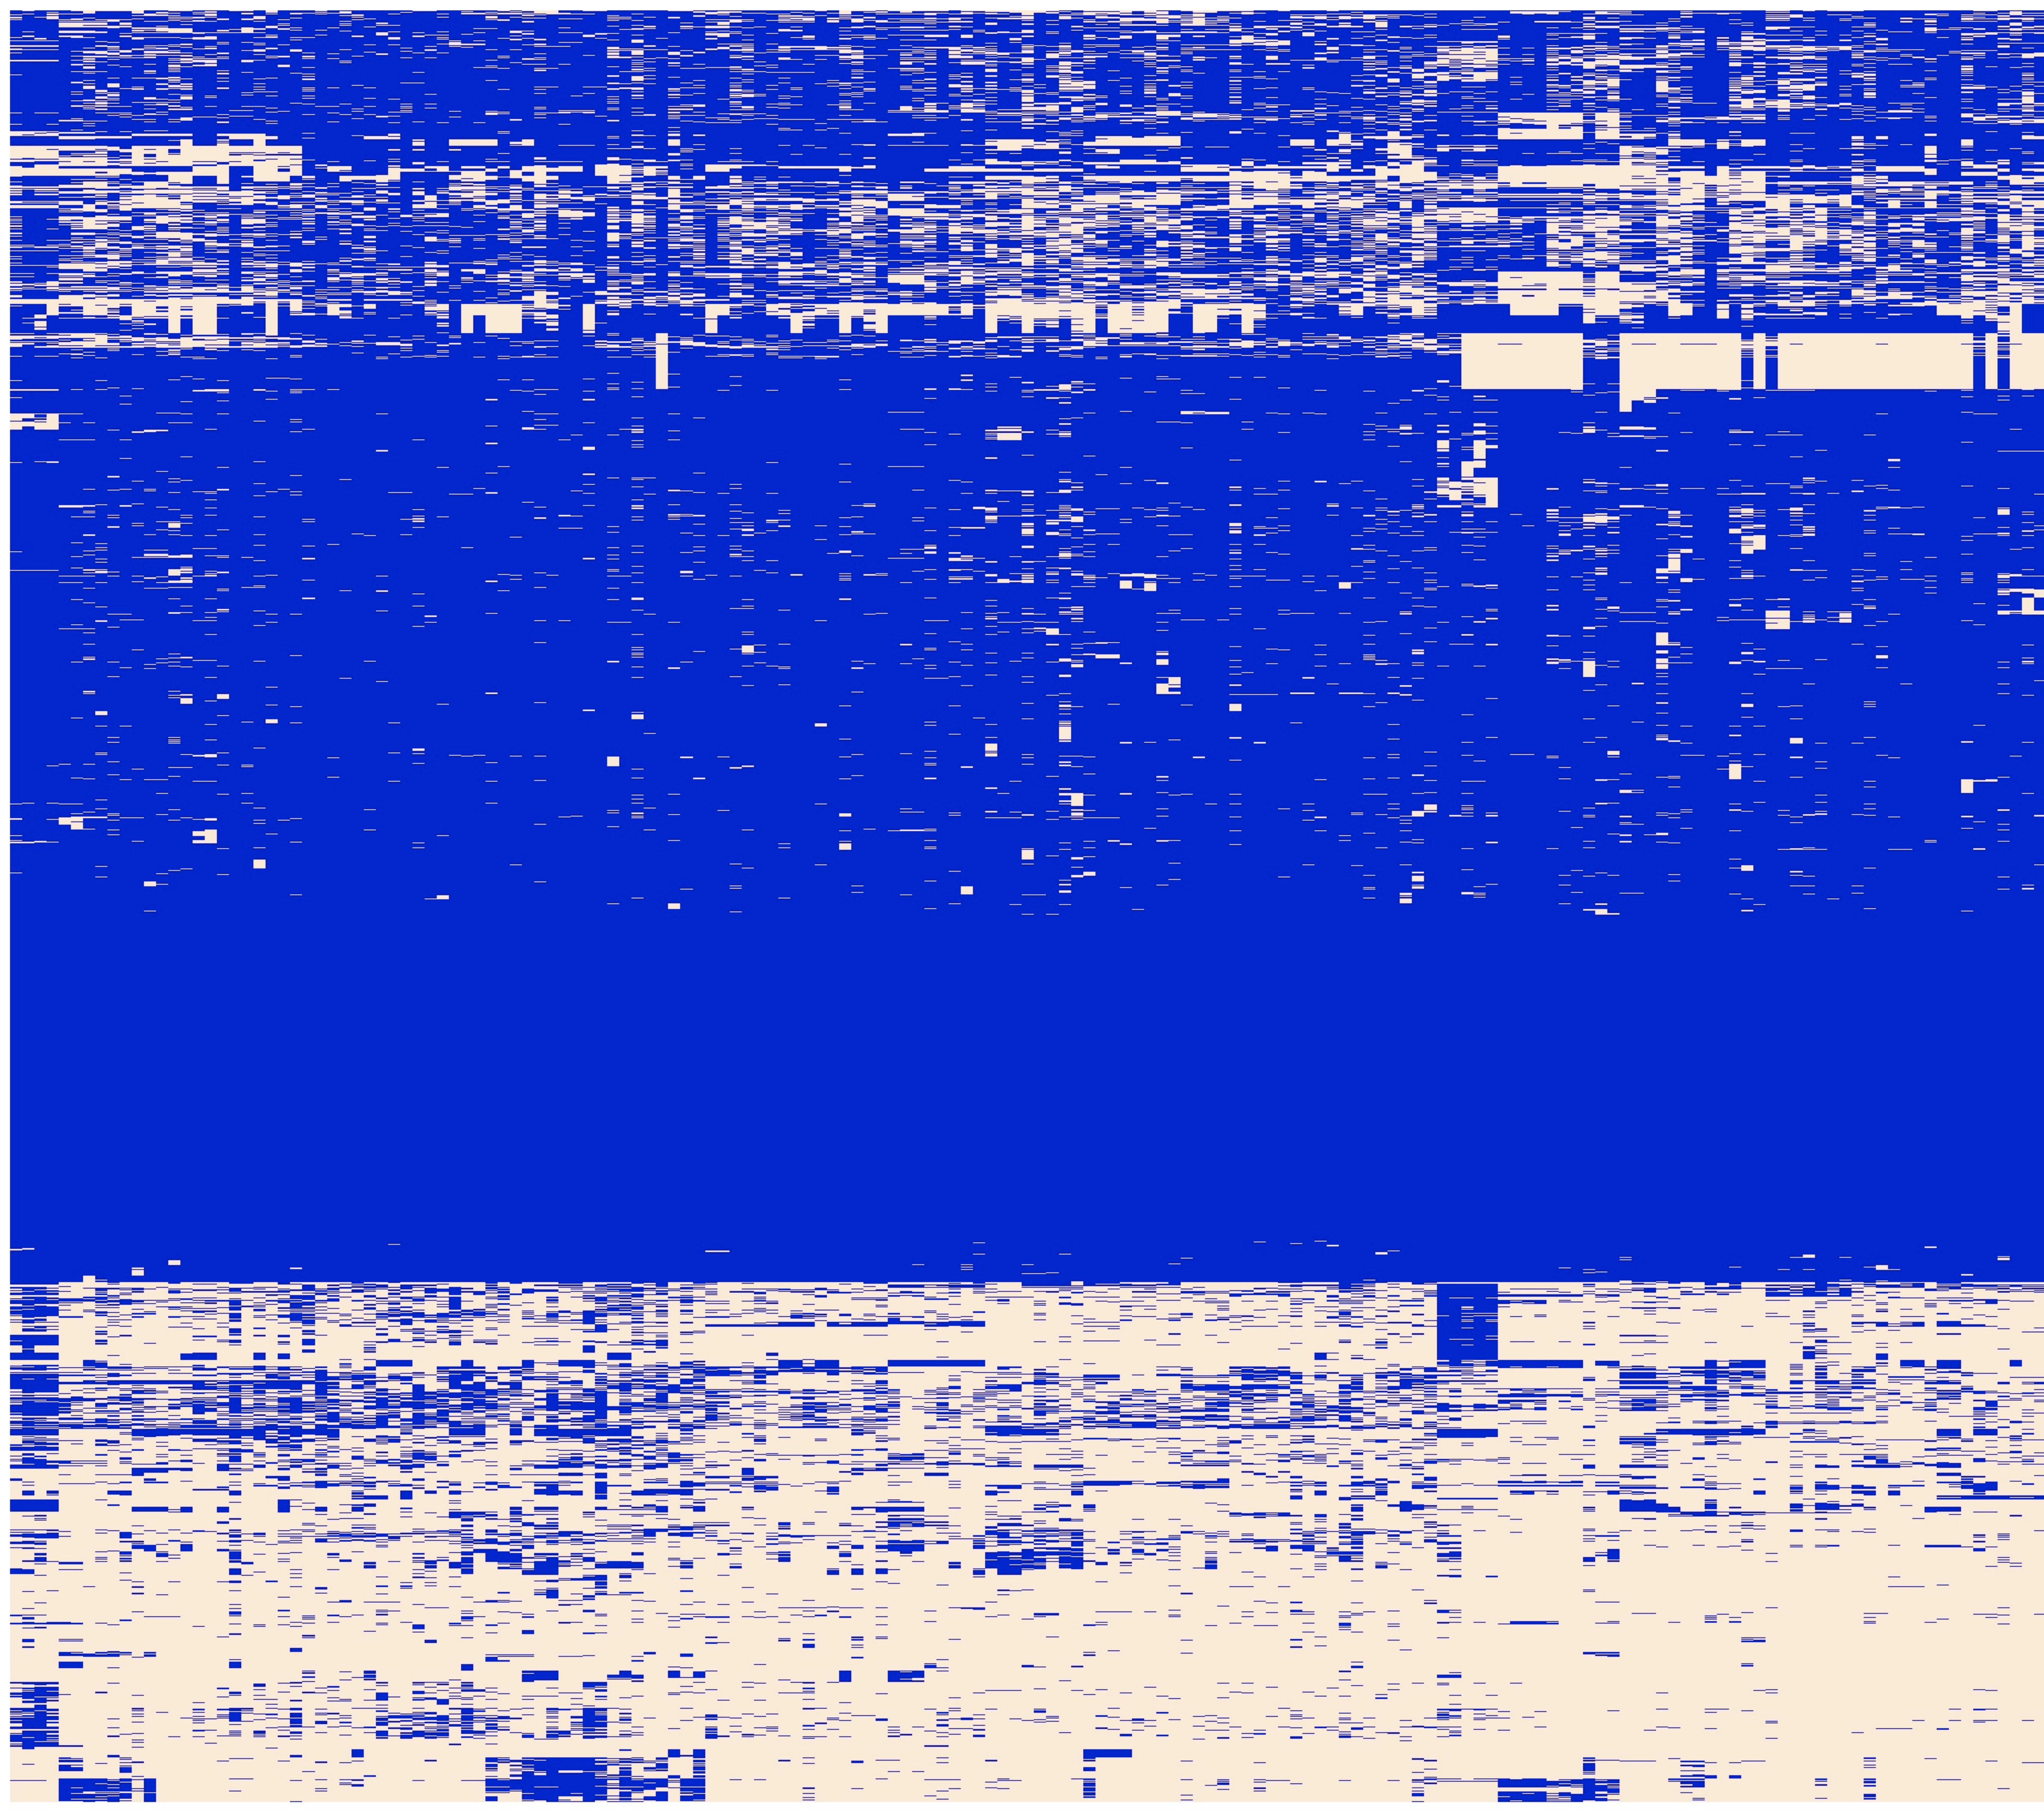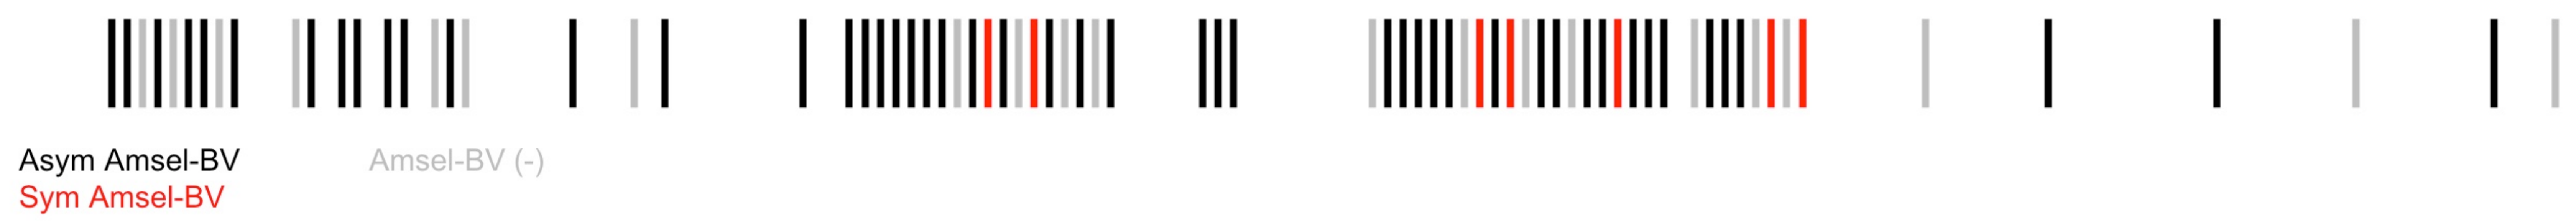

Atopobium vaginae mgSs  
Number of Samples=595, Number of Genes=10434

mgSs 1  
mgSs 2

Gene Clusters

- 1 6
- 2 7
- 3 8
- 4 9
- 5 10

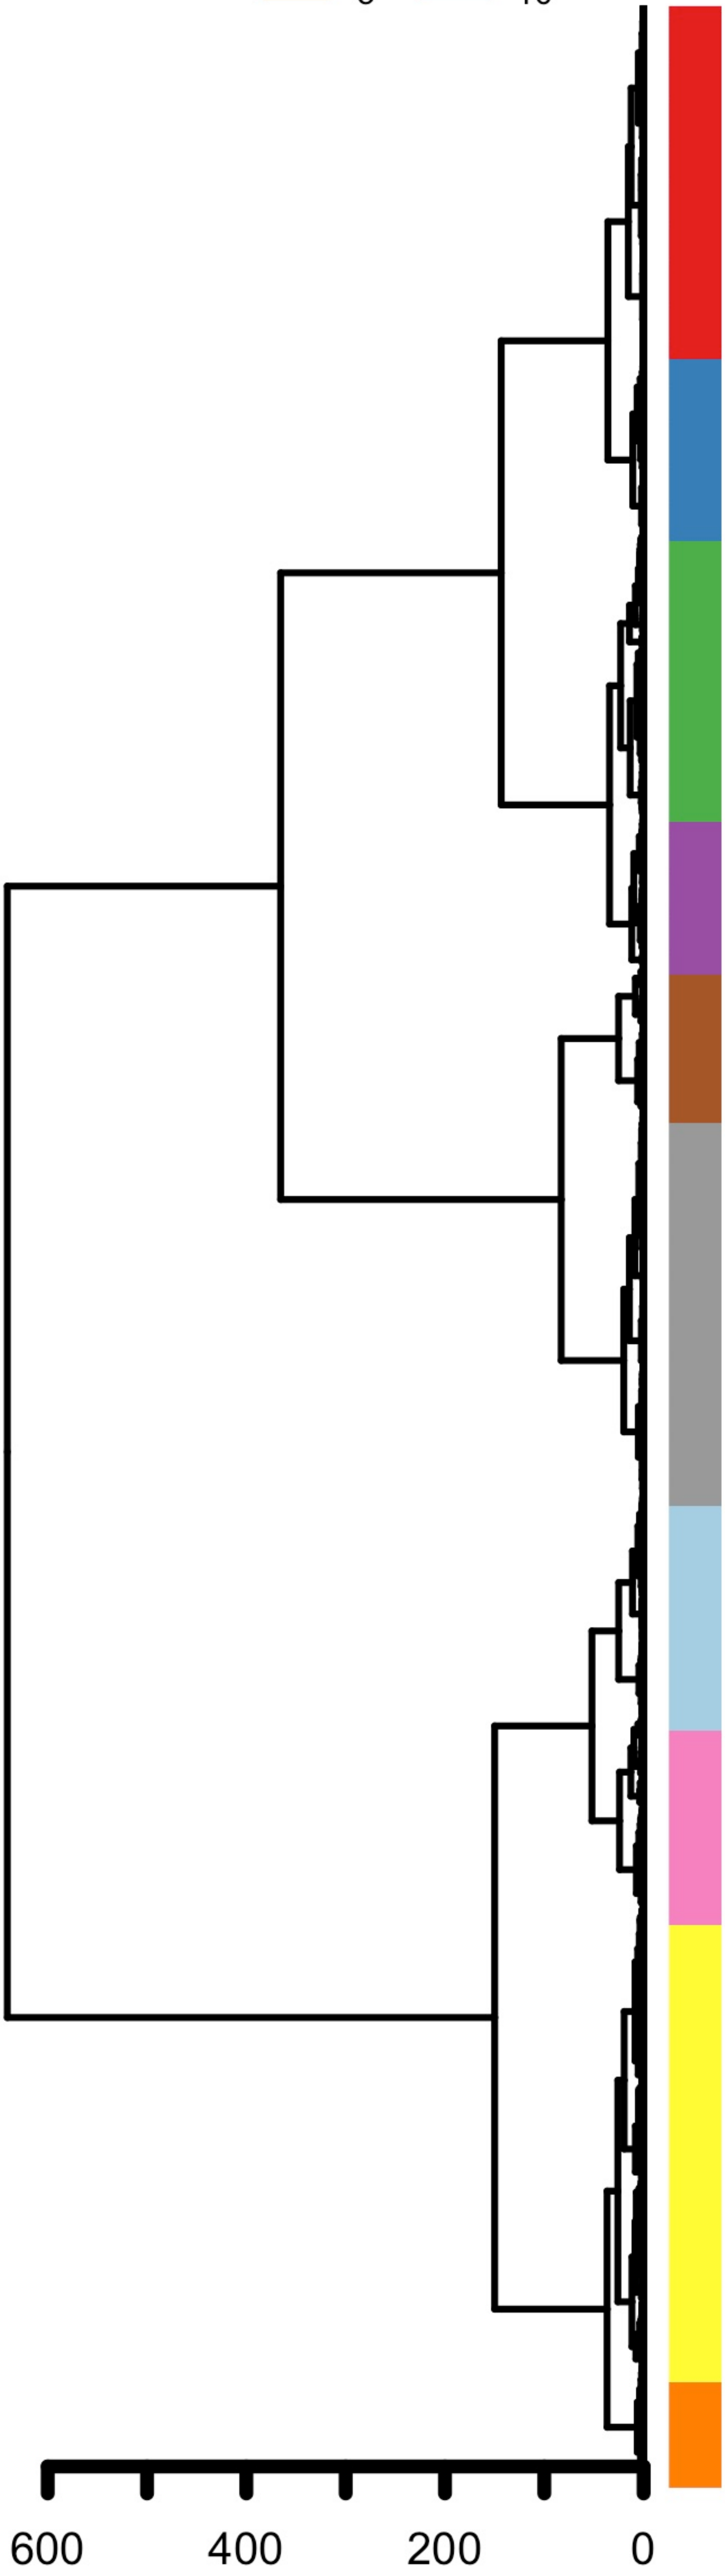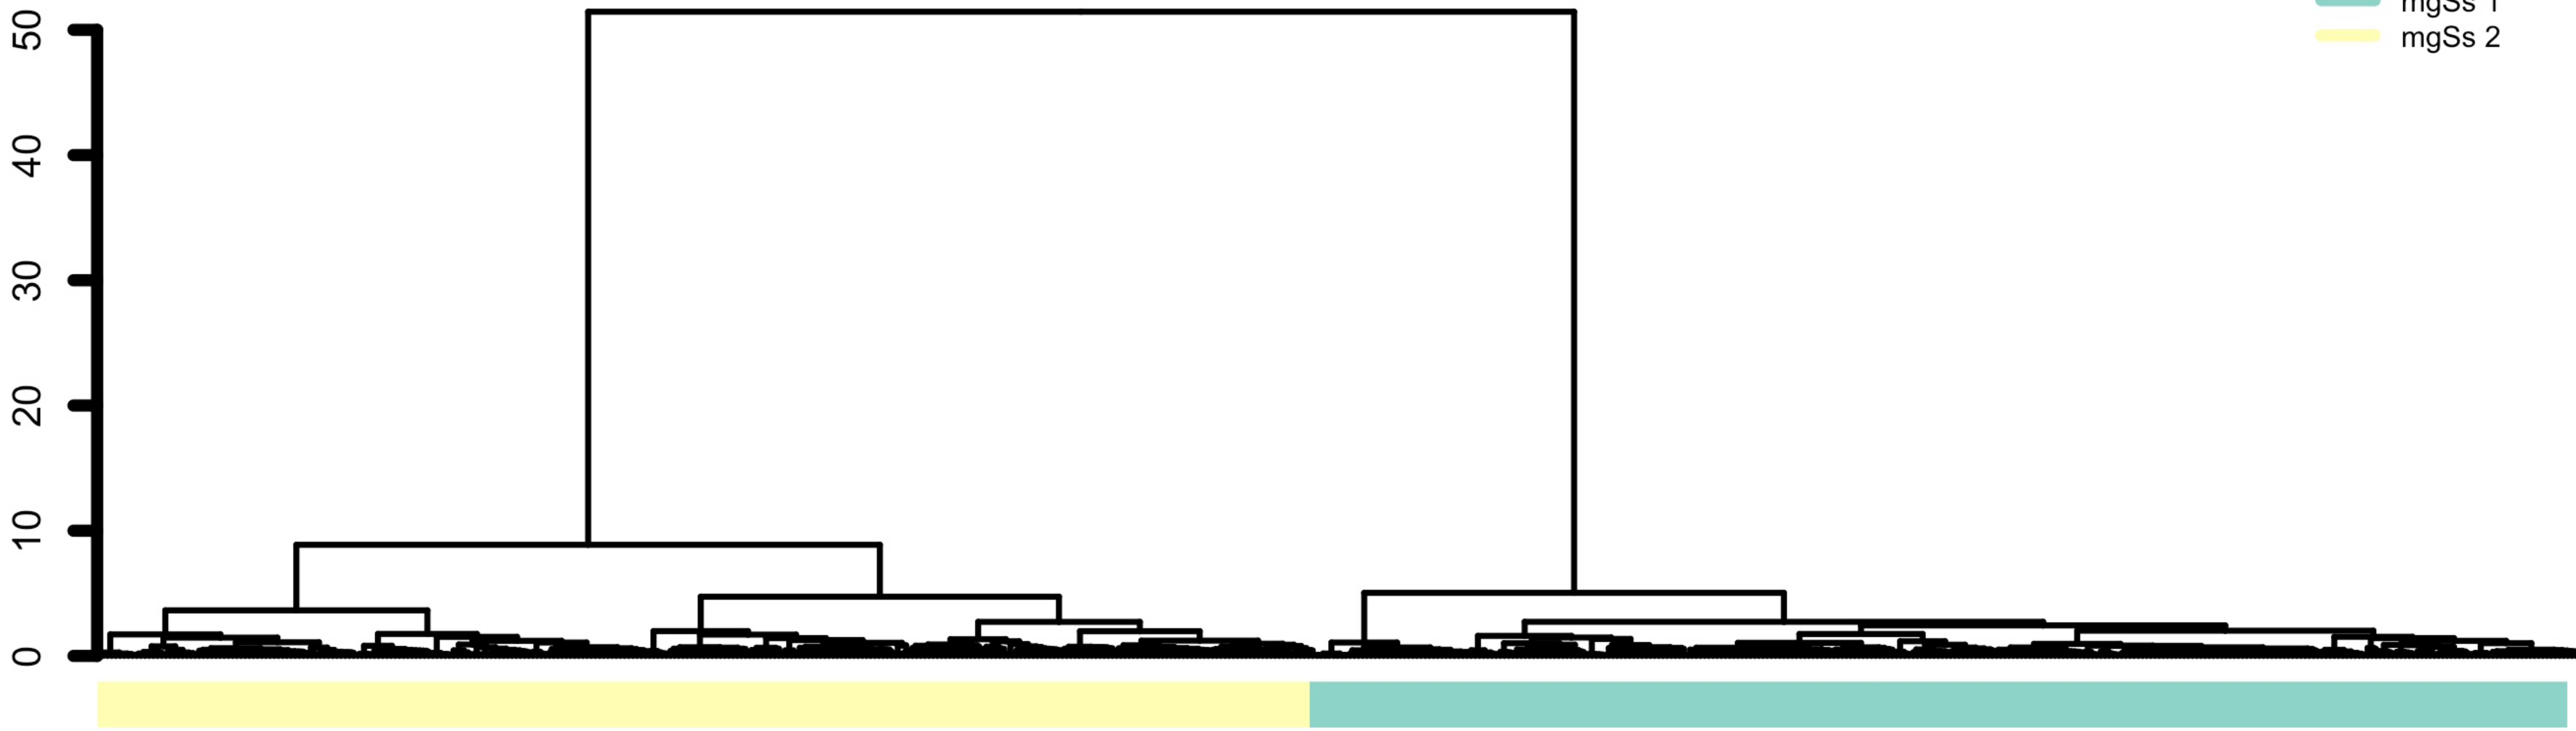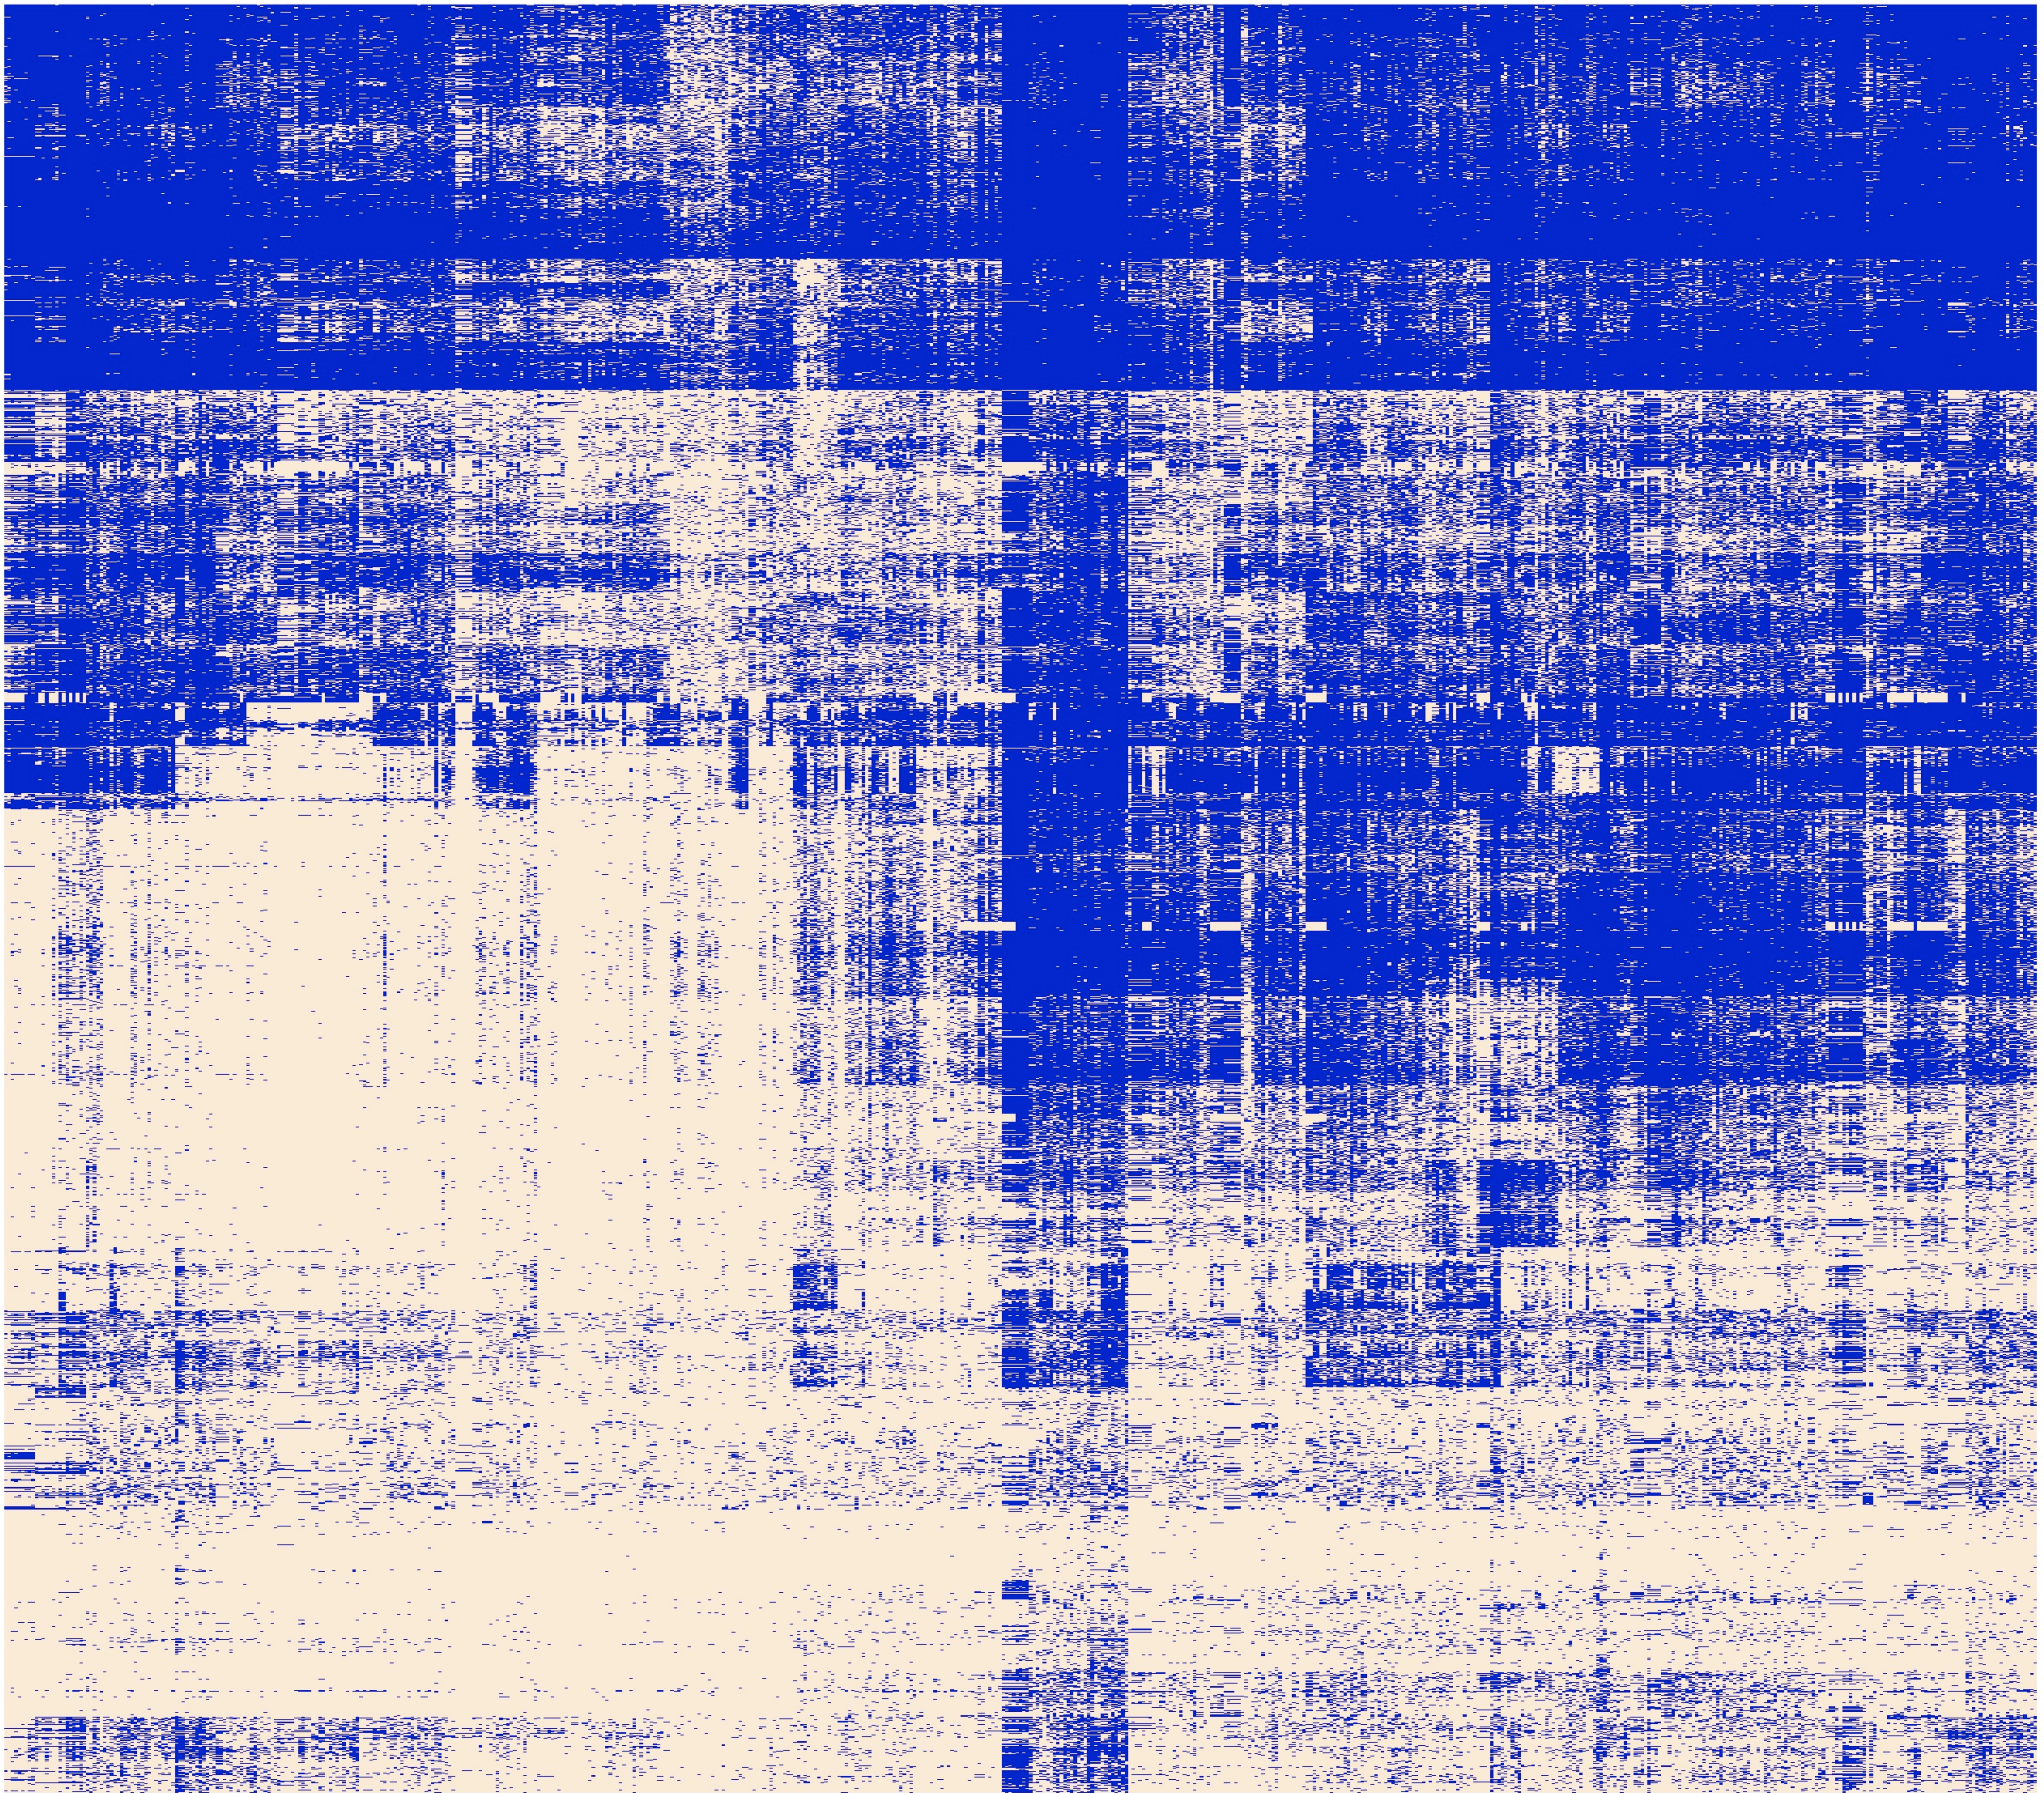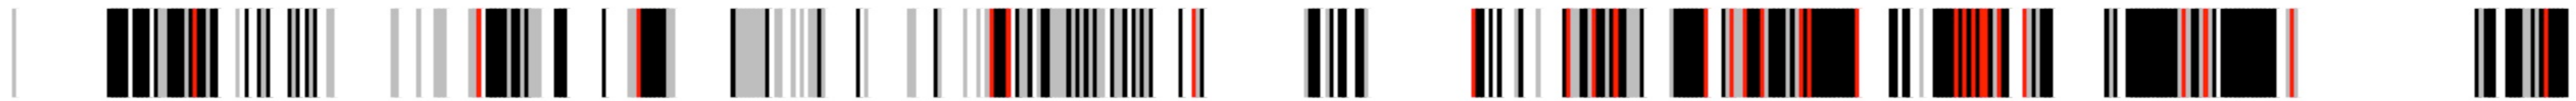

Asym Amsel-BV  
Sym Amsel-BV  
Amsel-BV (-)

Ca. Lachnocurva vaginae mgSs  
Number of Samples=299, Number of Genes=1356

- mgSs 1
- mgSs 2
- mgSs 3
- mgSs 4
- mgSs 5

- Gene Clusters
- |   |    |
|---|----|
| 1 | 6  |
| 2 | 7  |
| 3 | 8  |
| 4 | 9  |
| 5 | 10 |

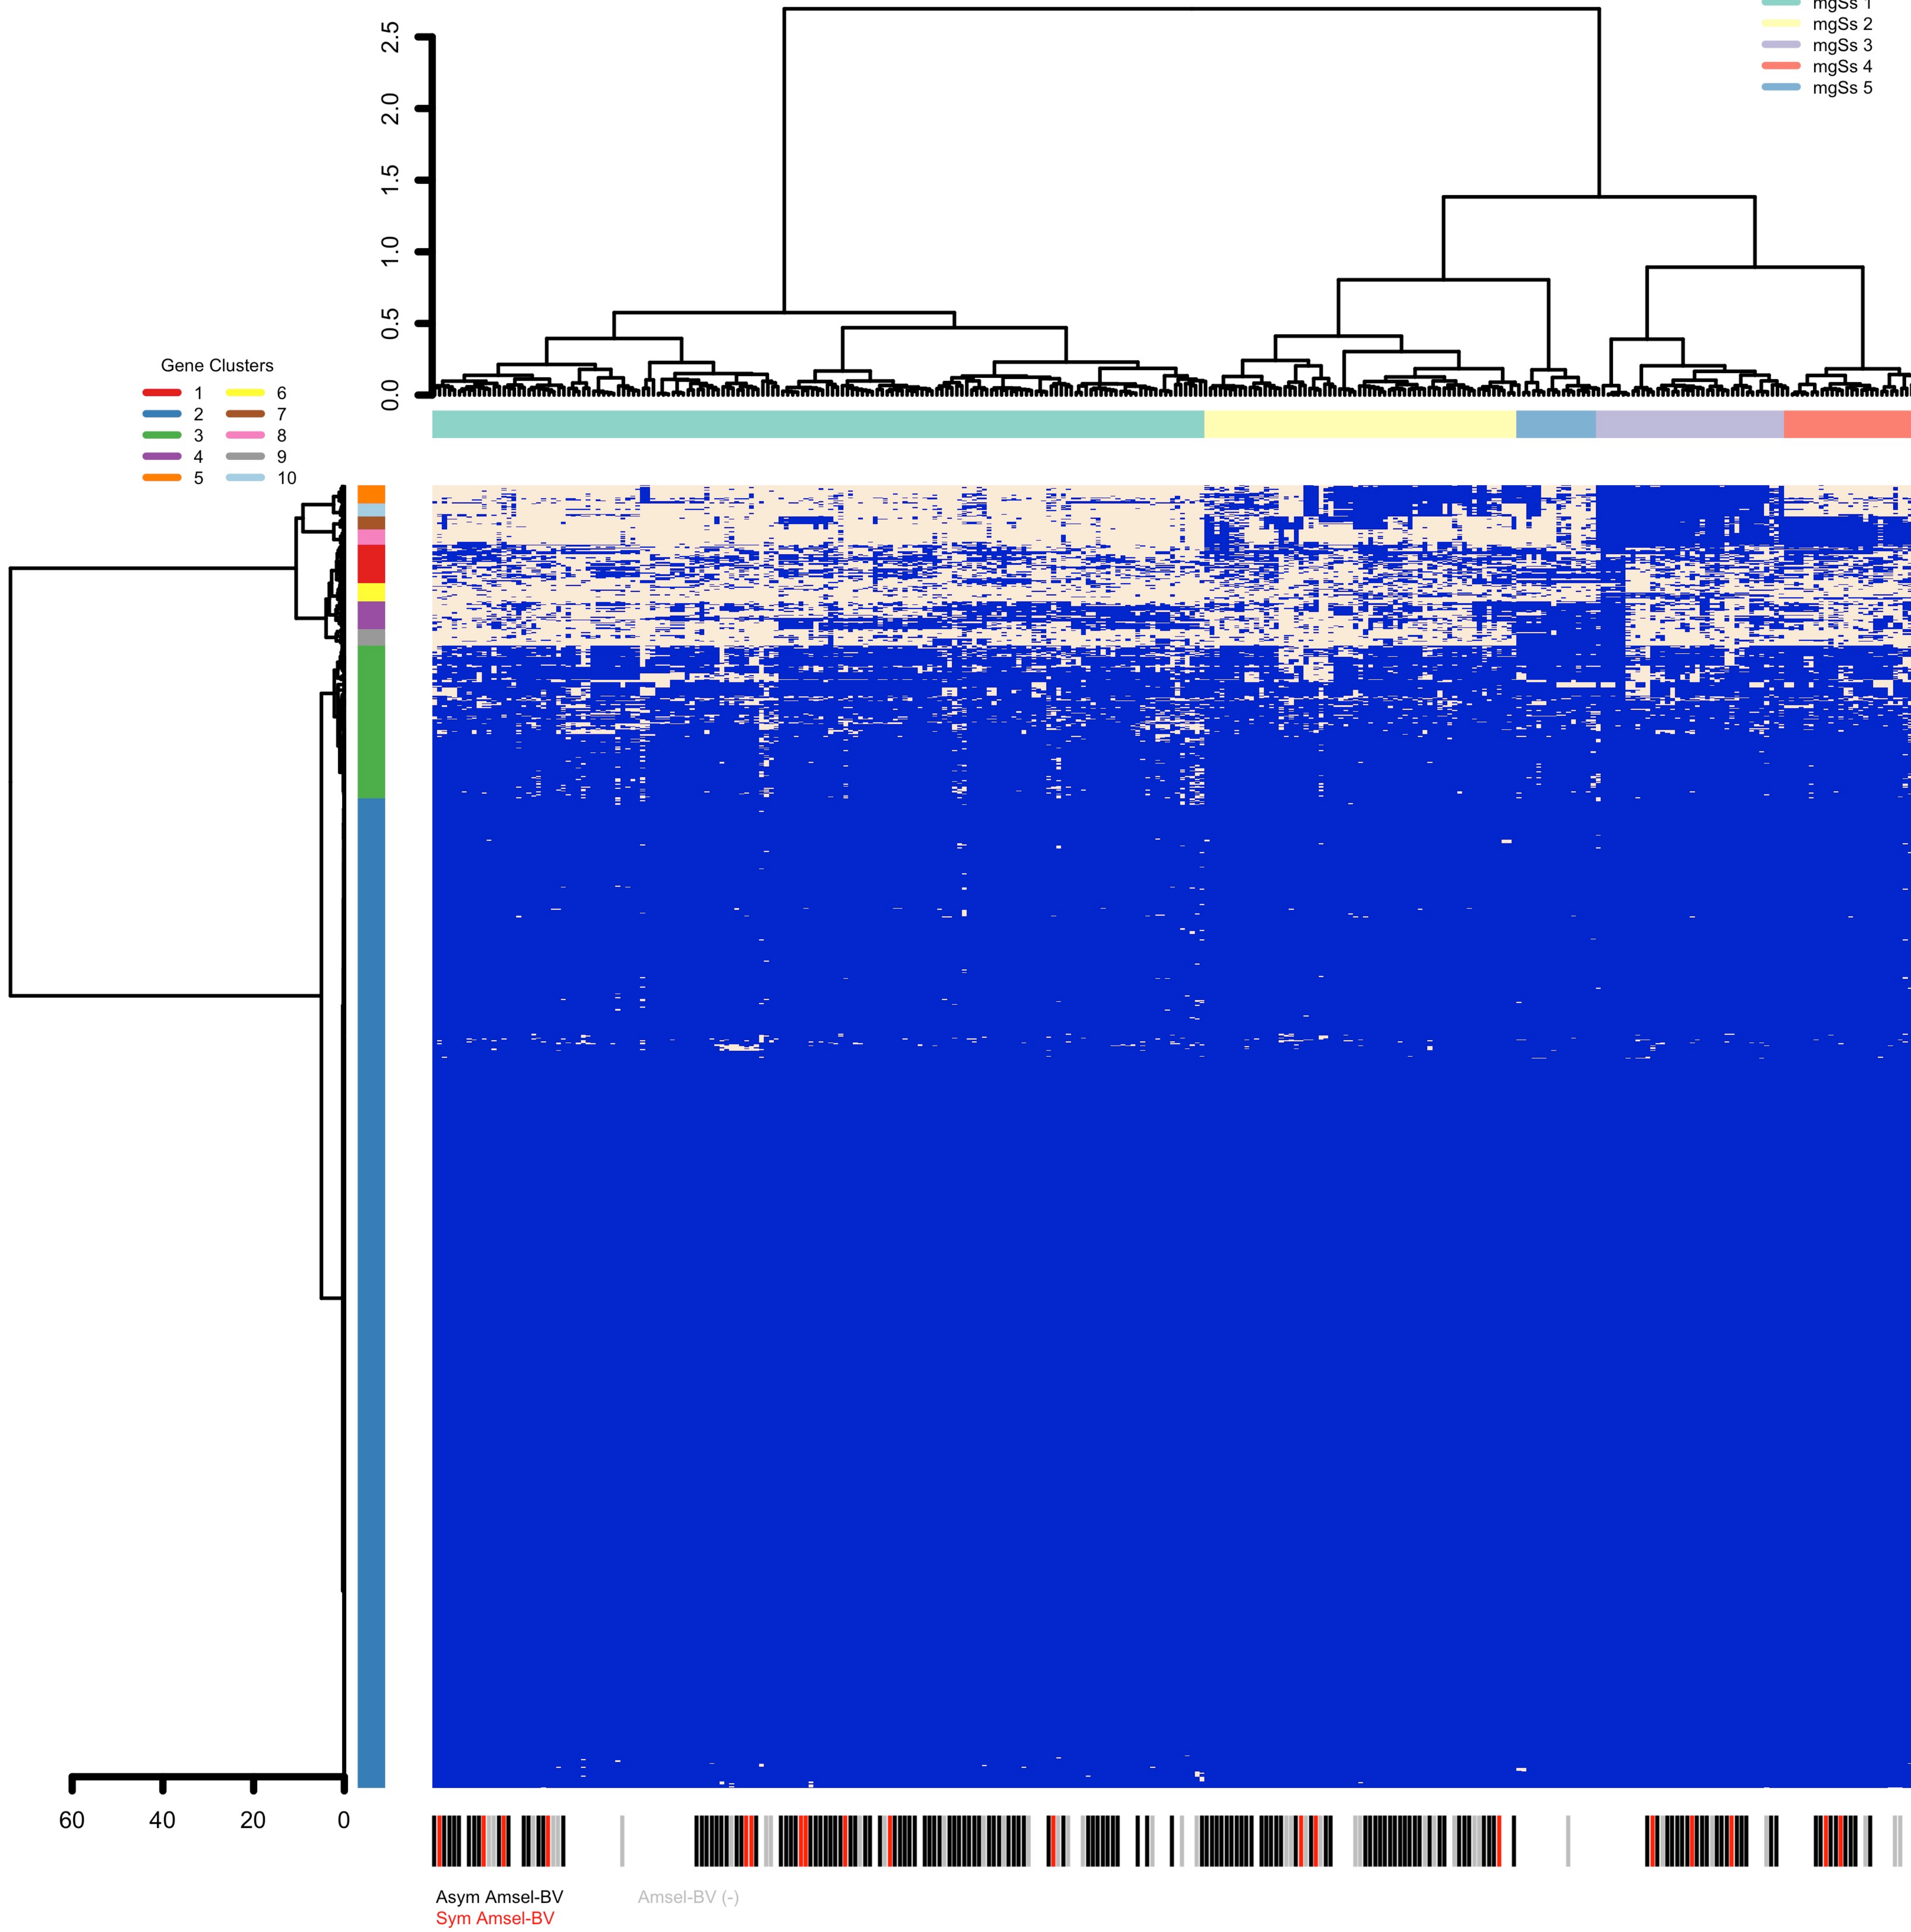

Clostridiales Family mgSs  
Number of Samples=40, Number of Genes=5505

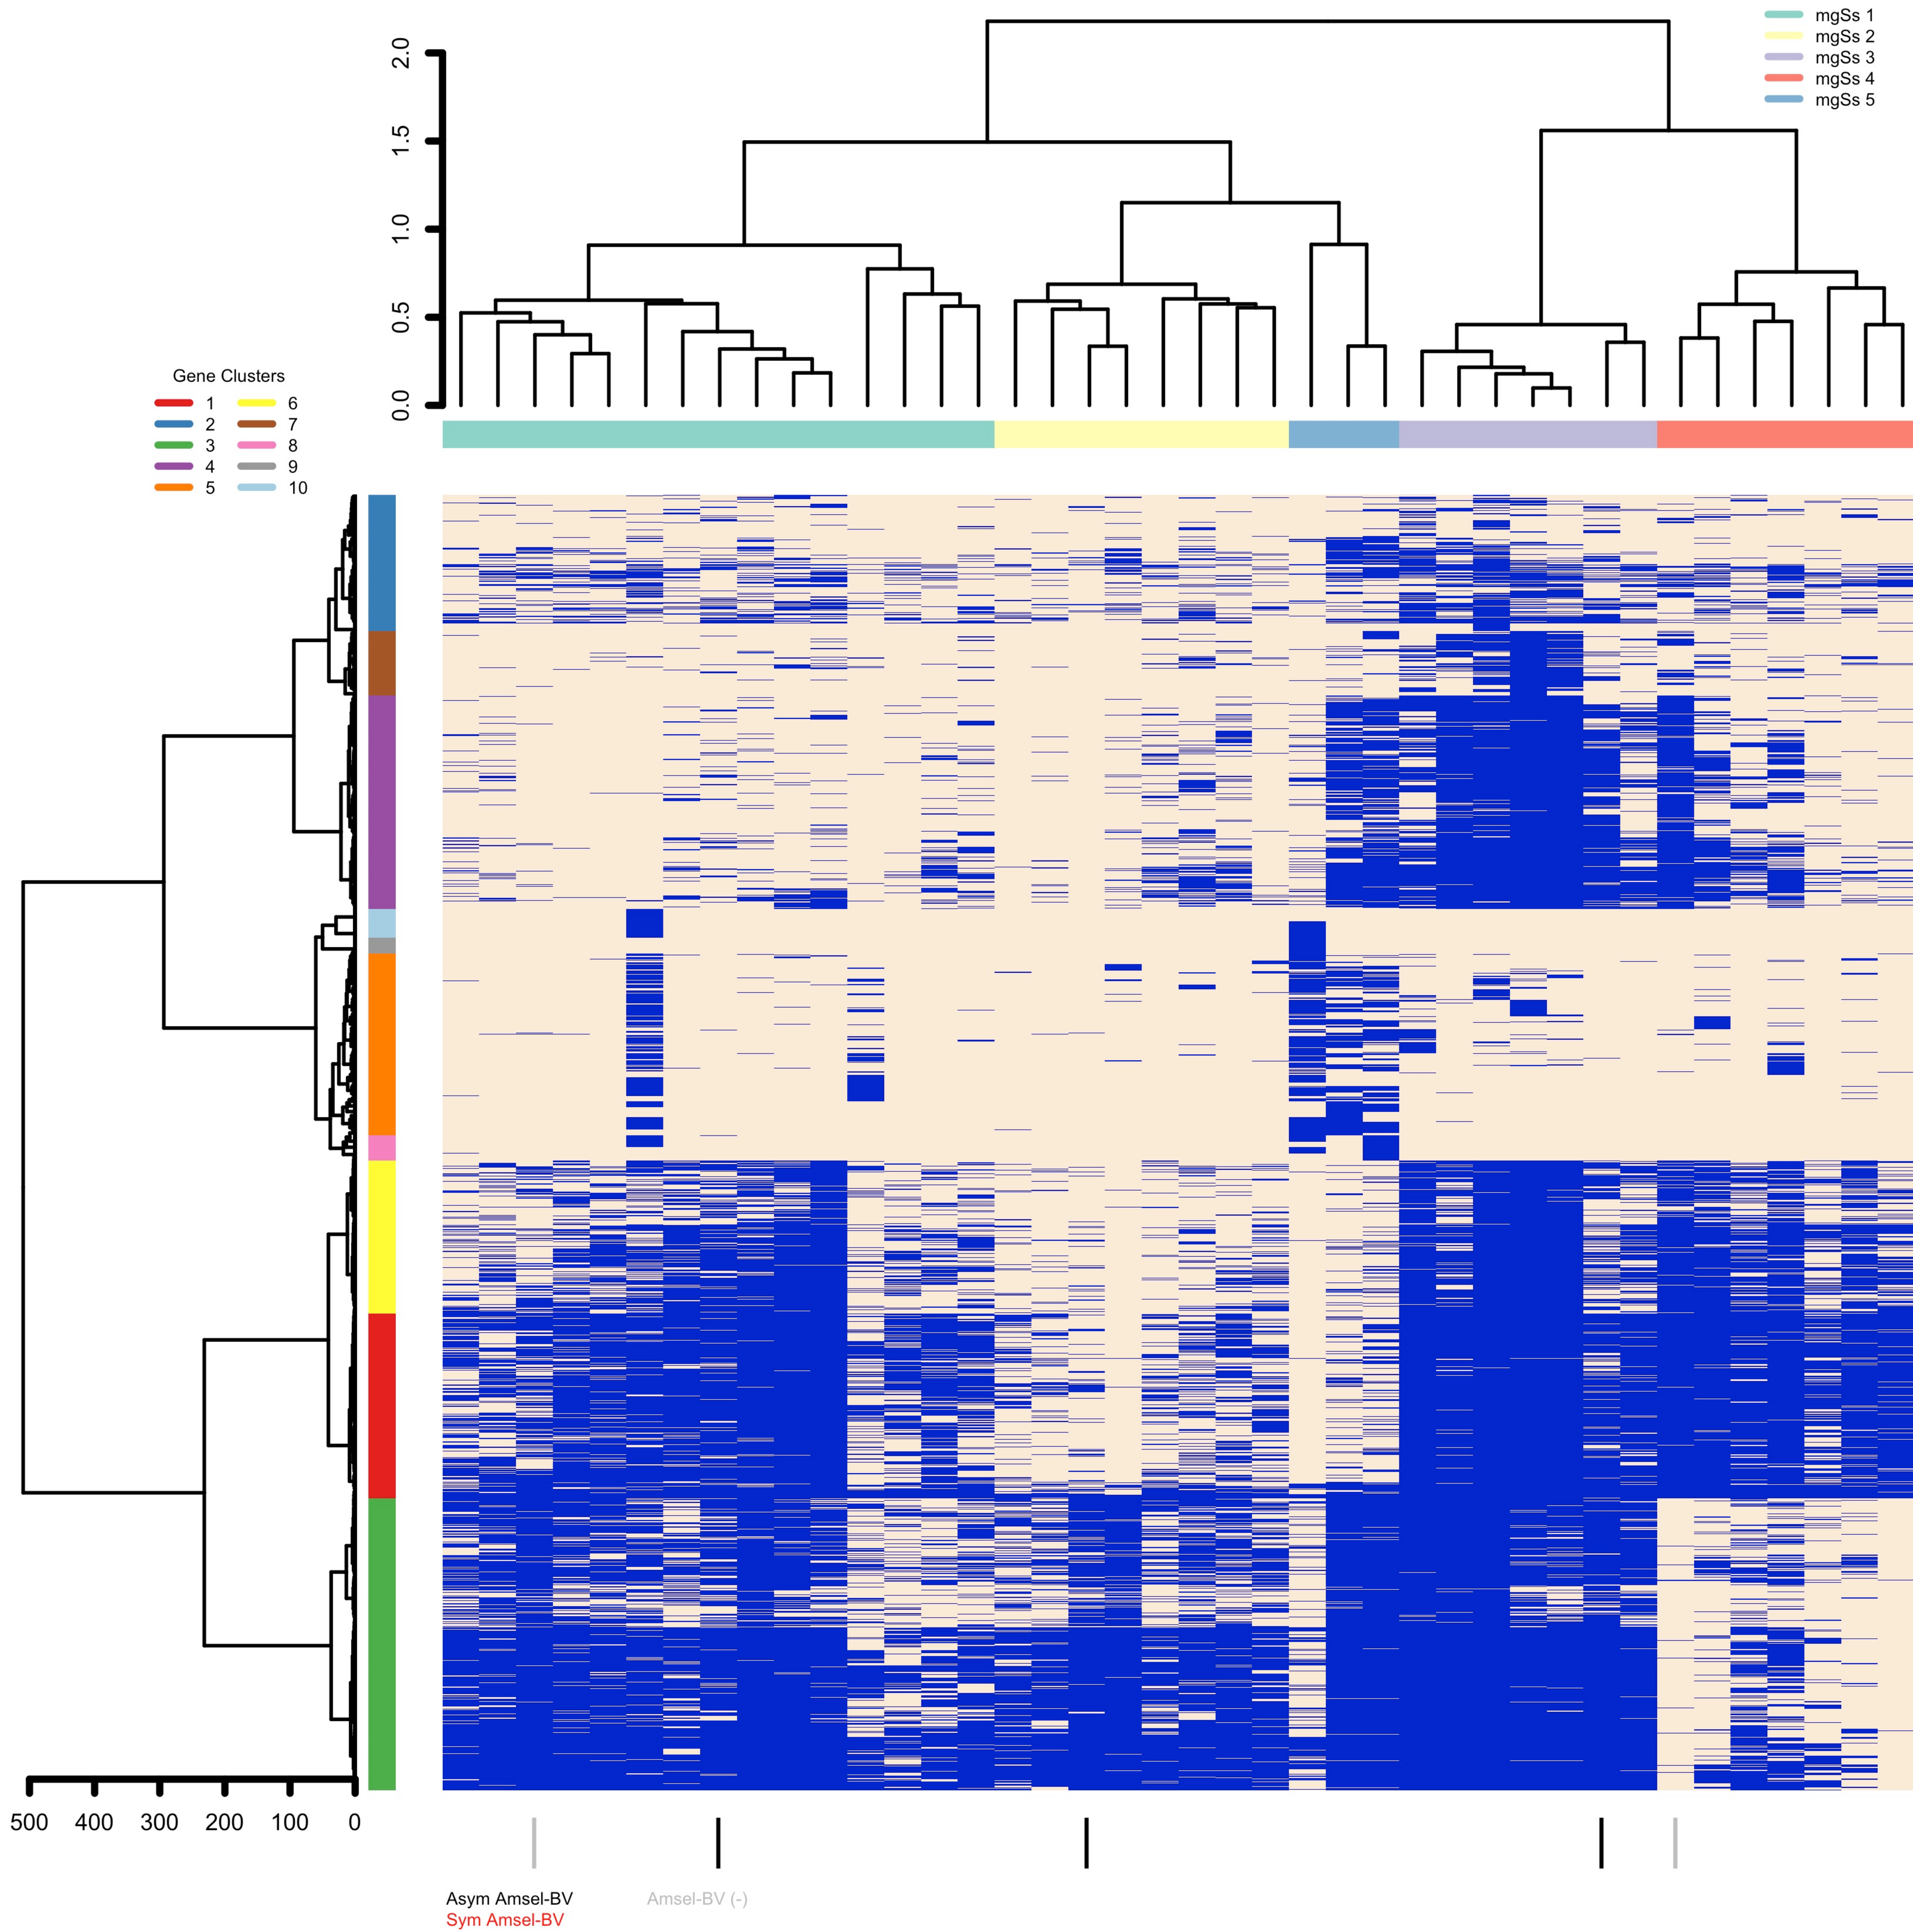

Enterococcus faecalis mgSs  
Number of Samples=22, Number of Genes=4551

mgSs 1

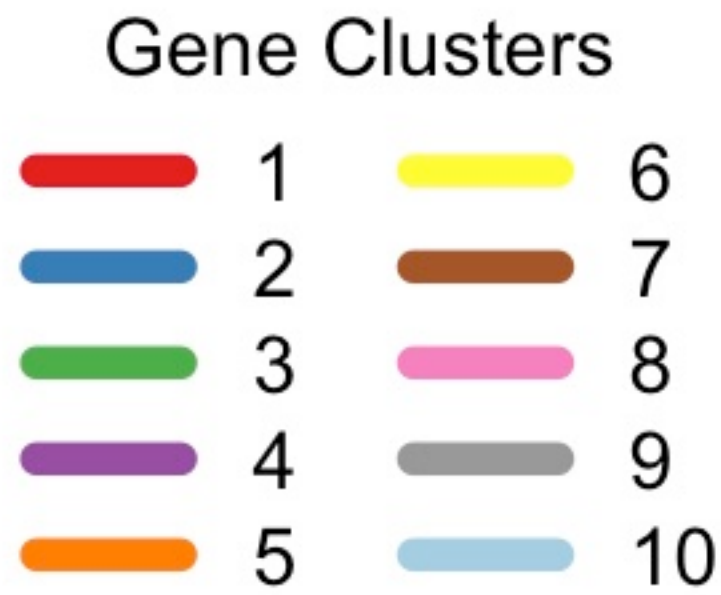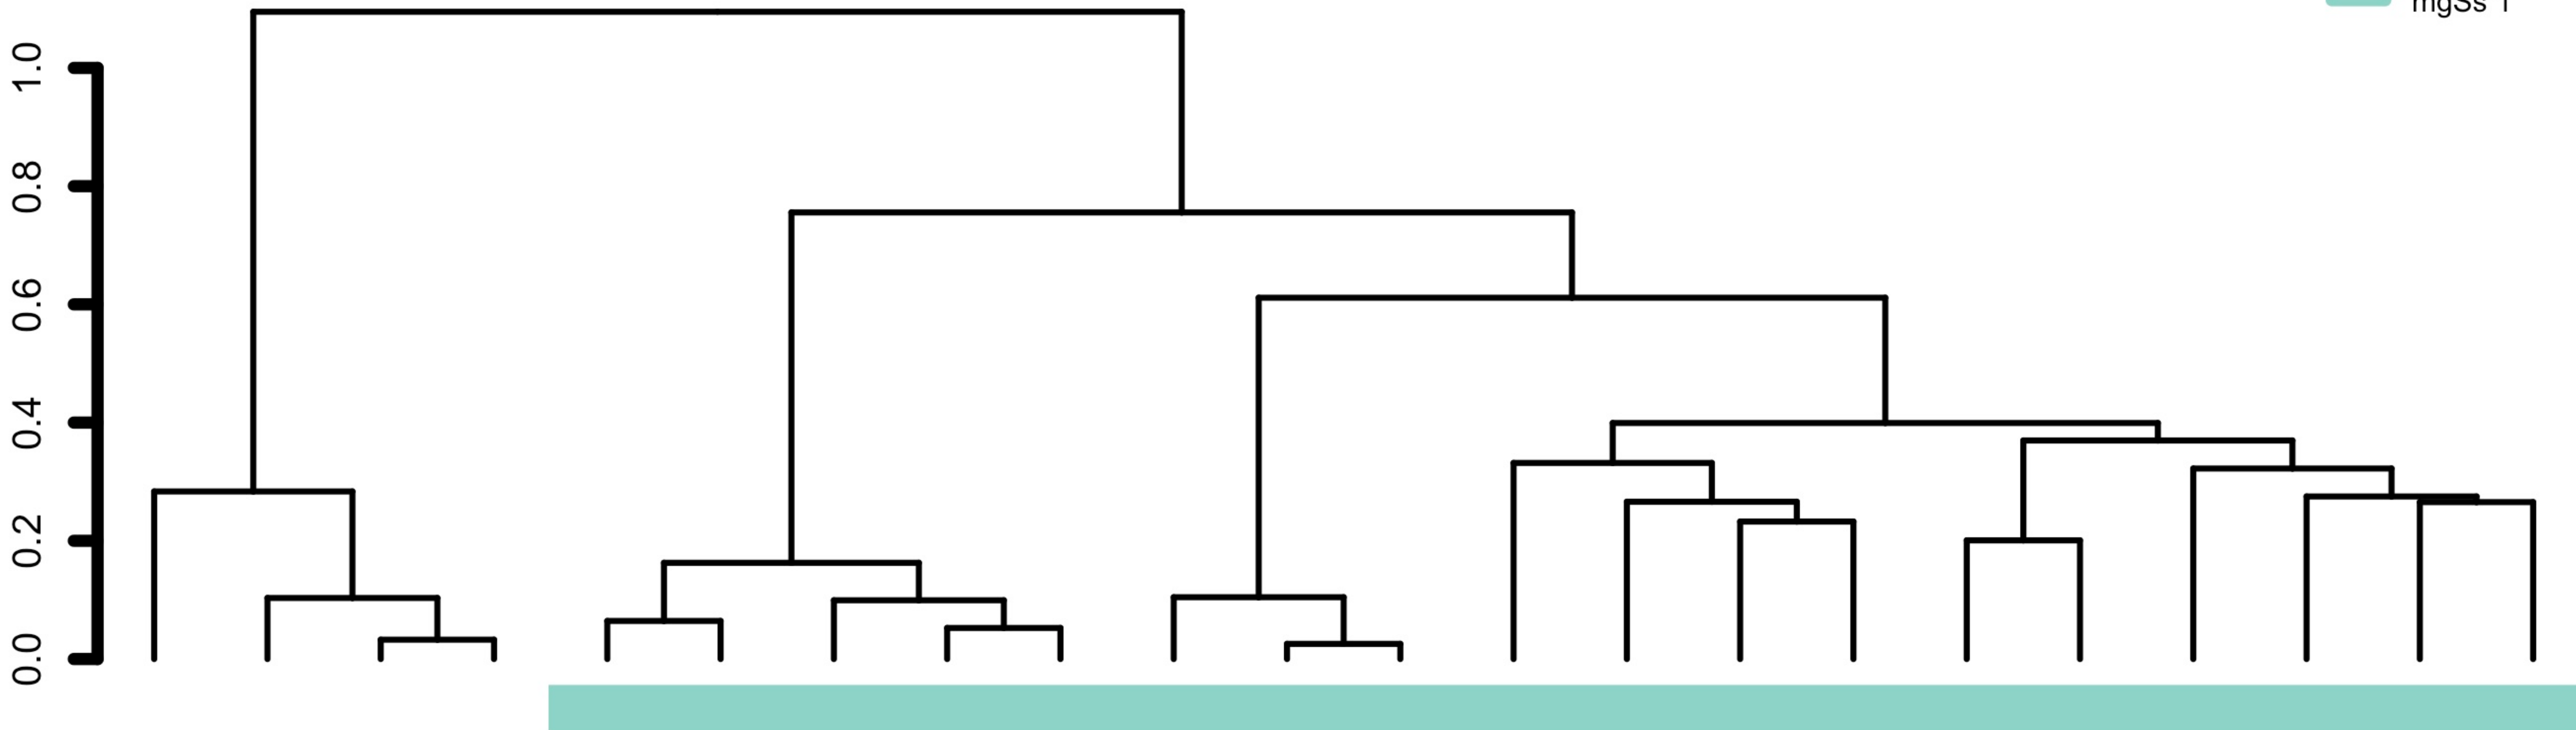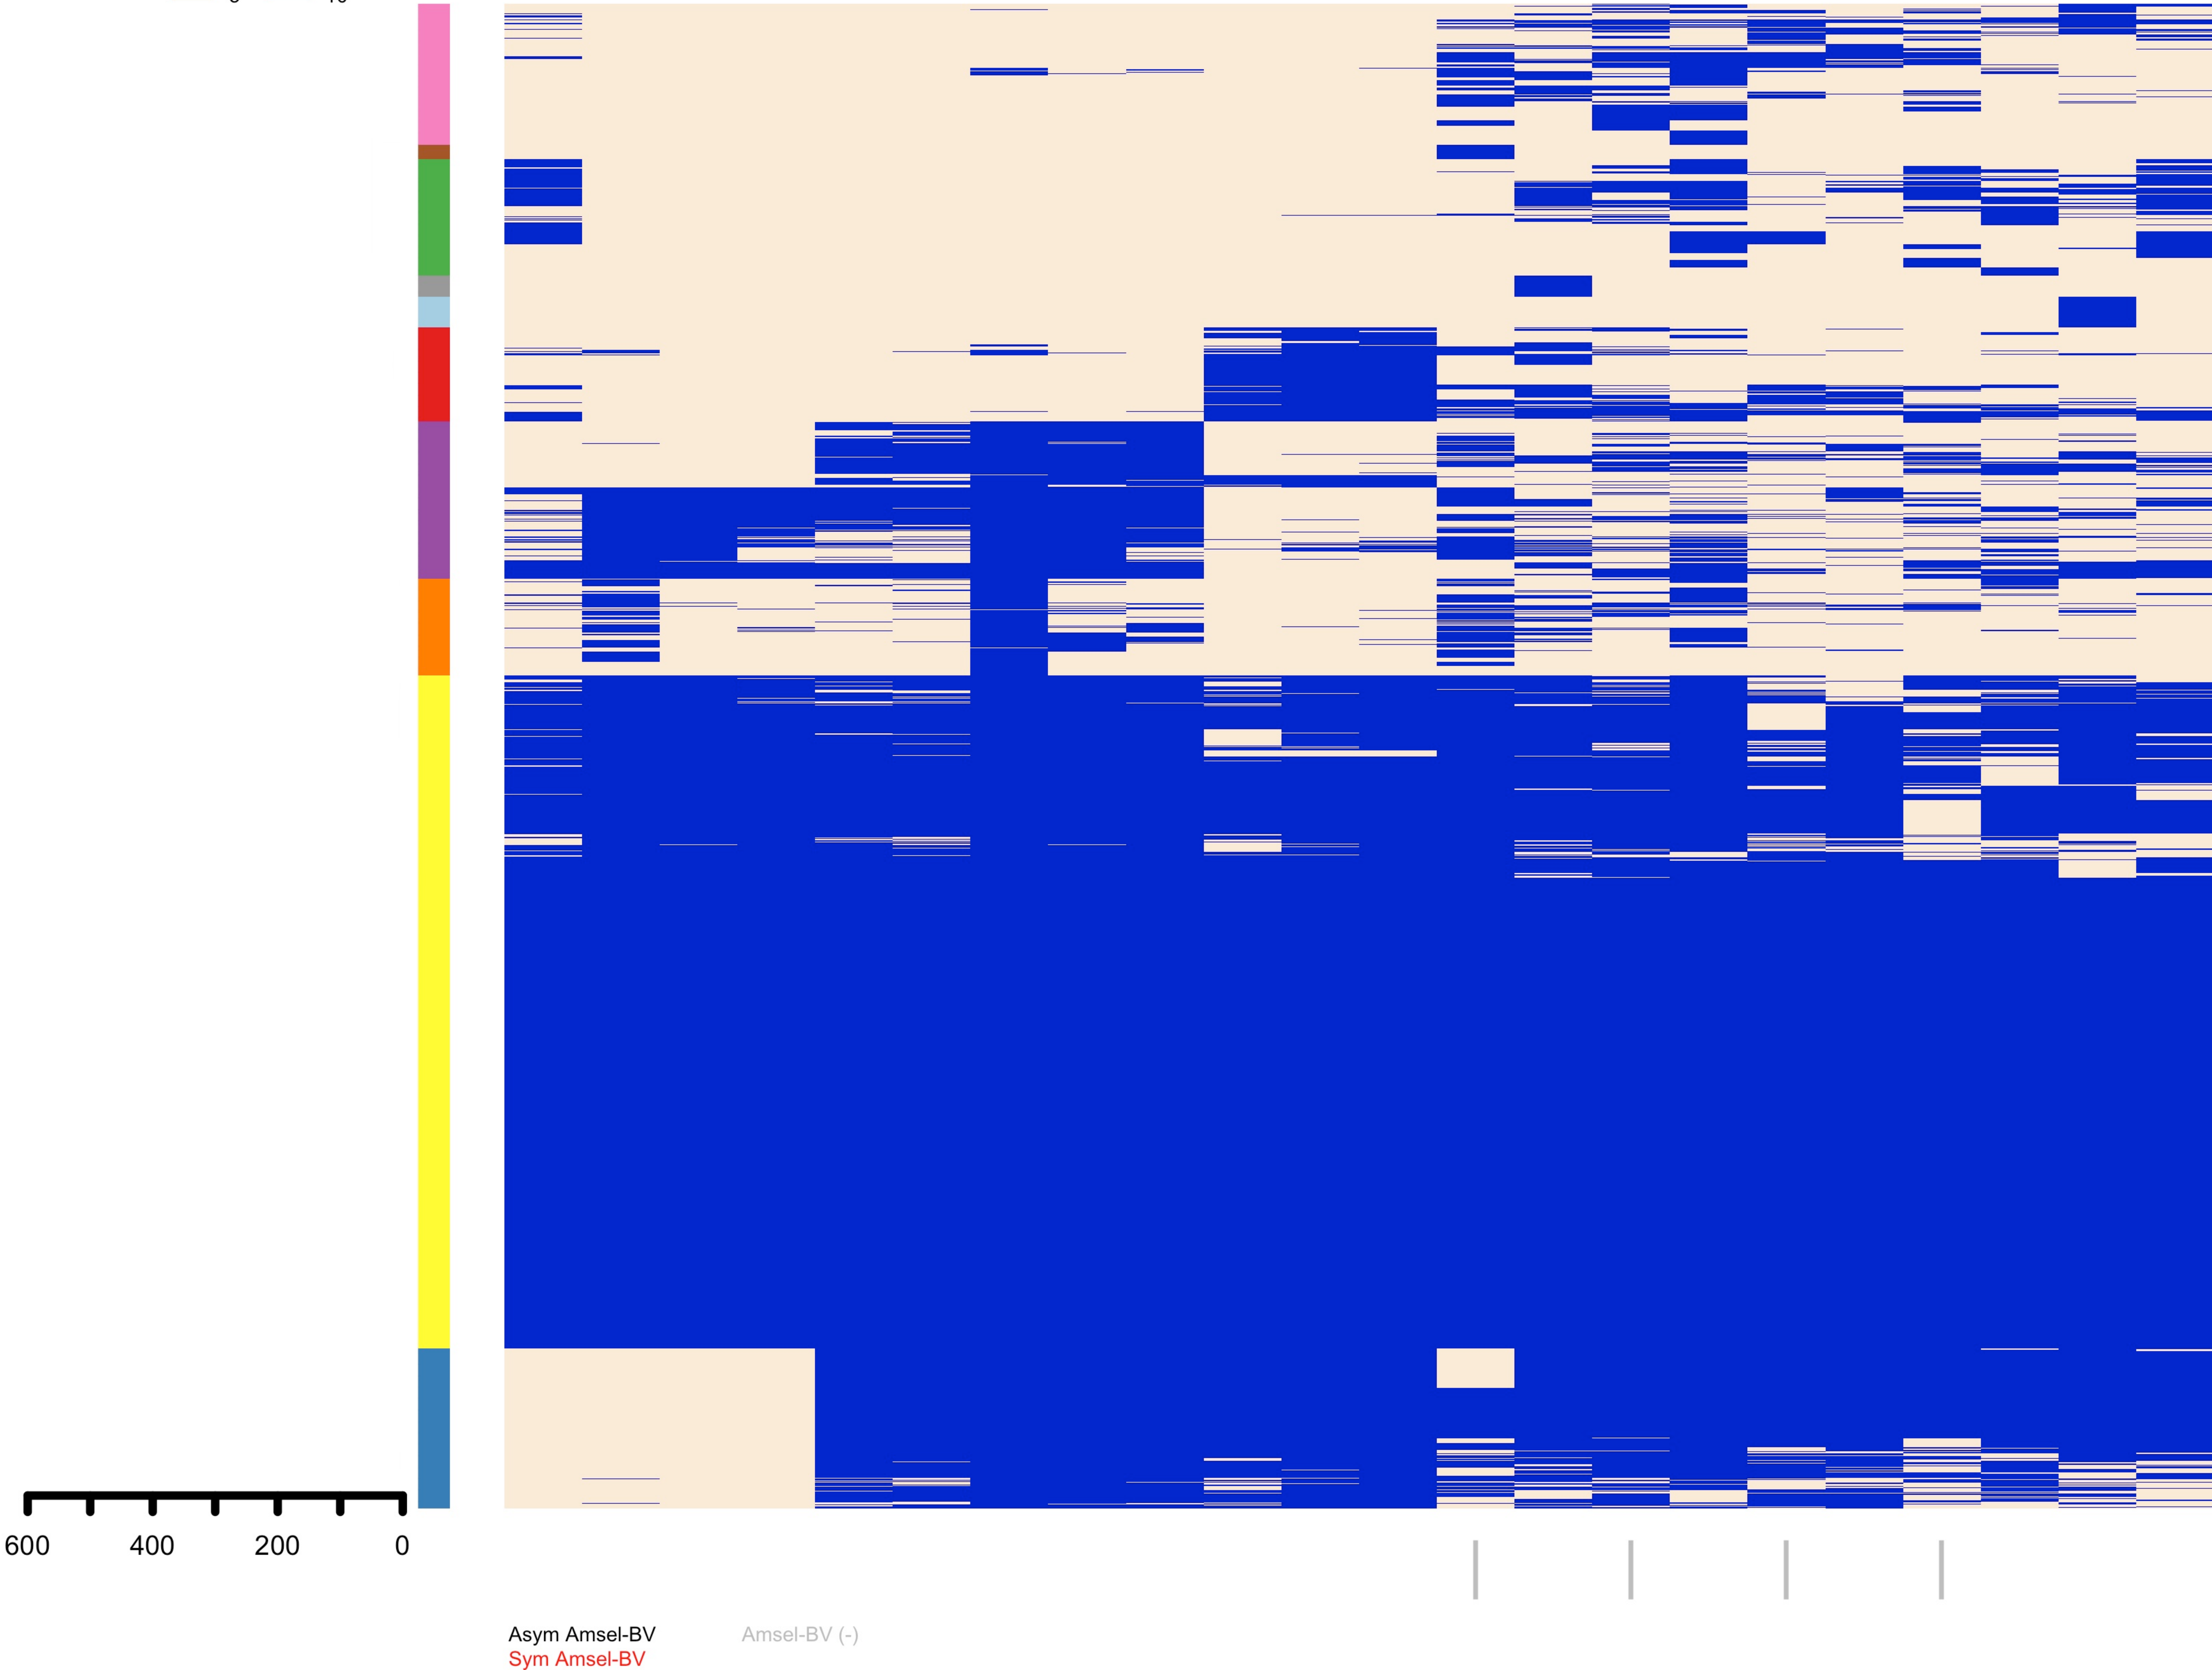

Gardnerella vaginalis mgSs  
Number of Samples=1213, Number of Genes=32030

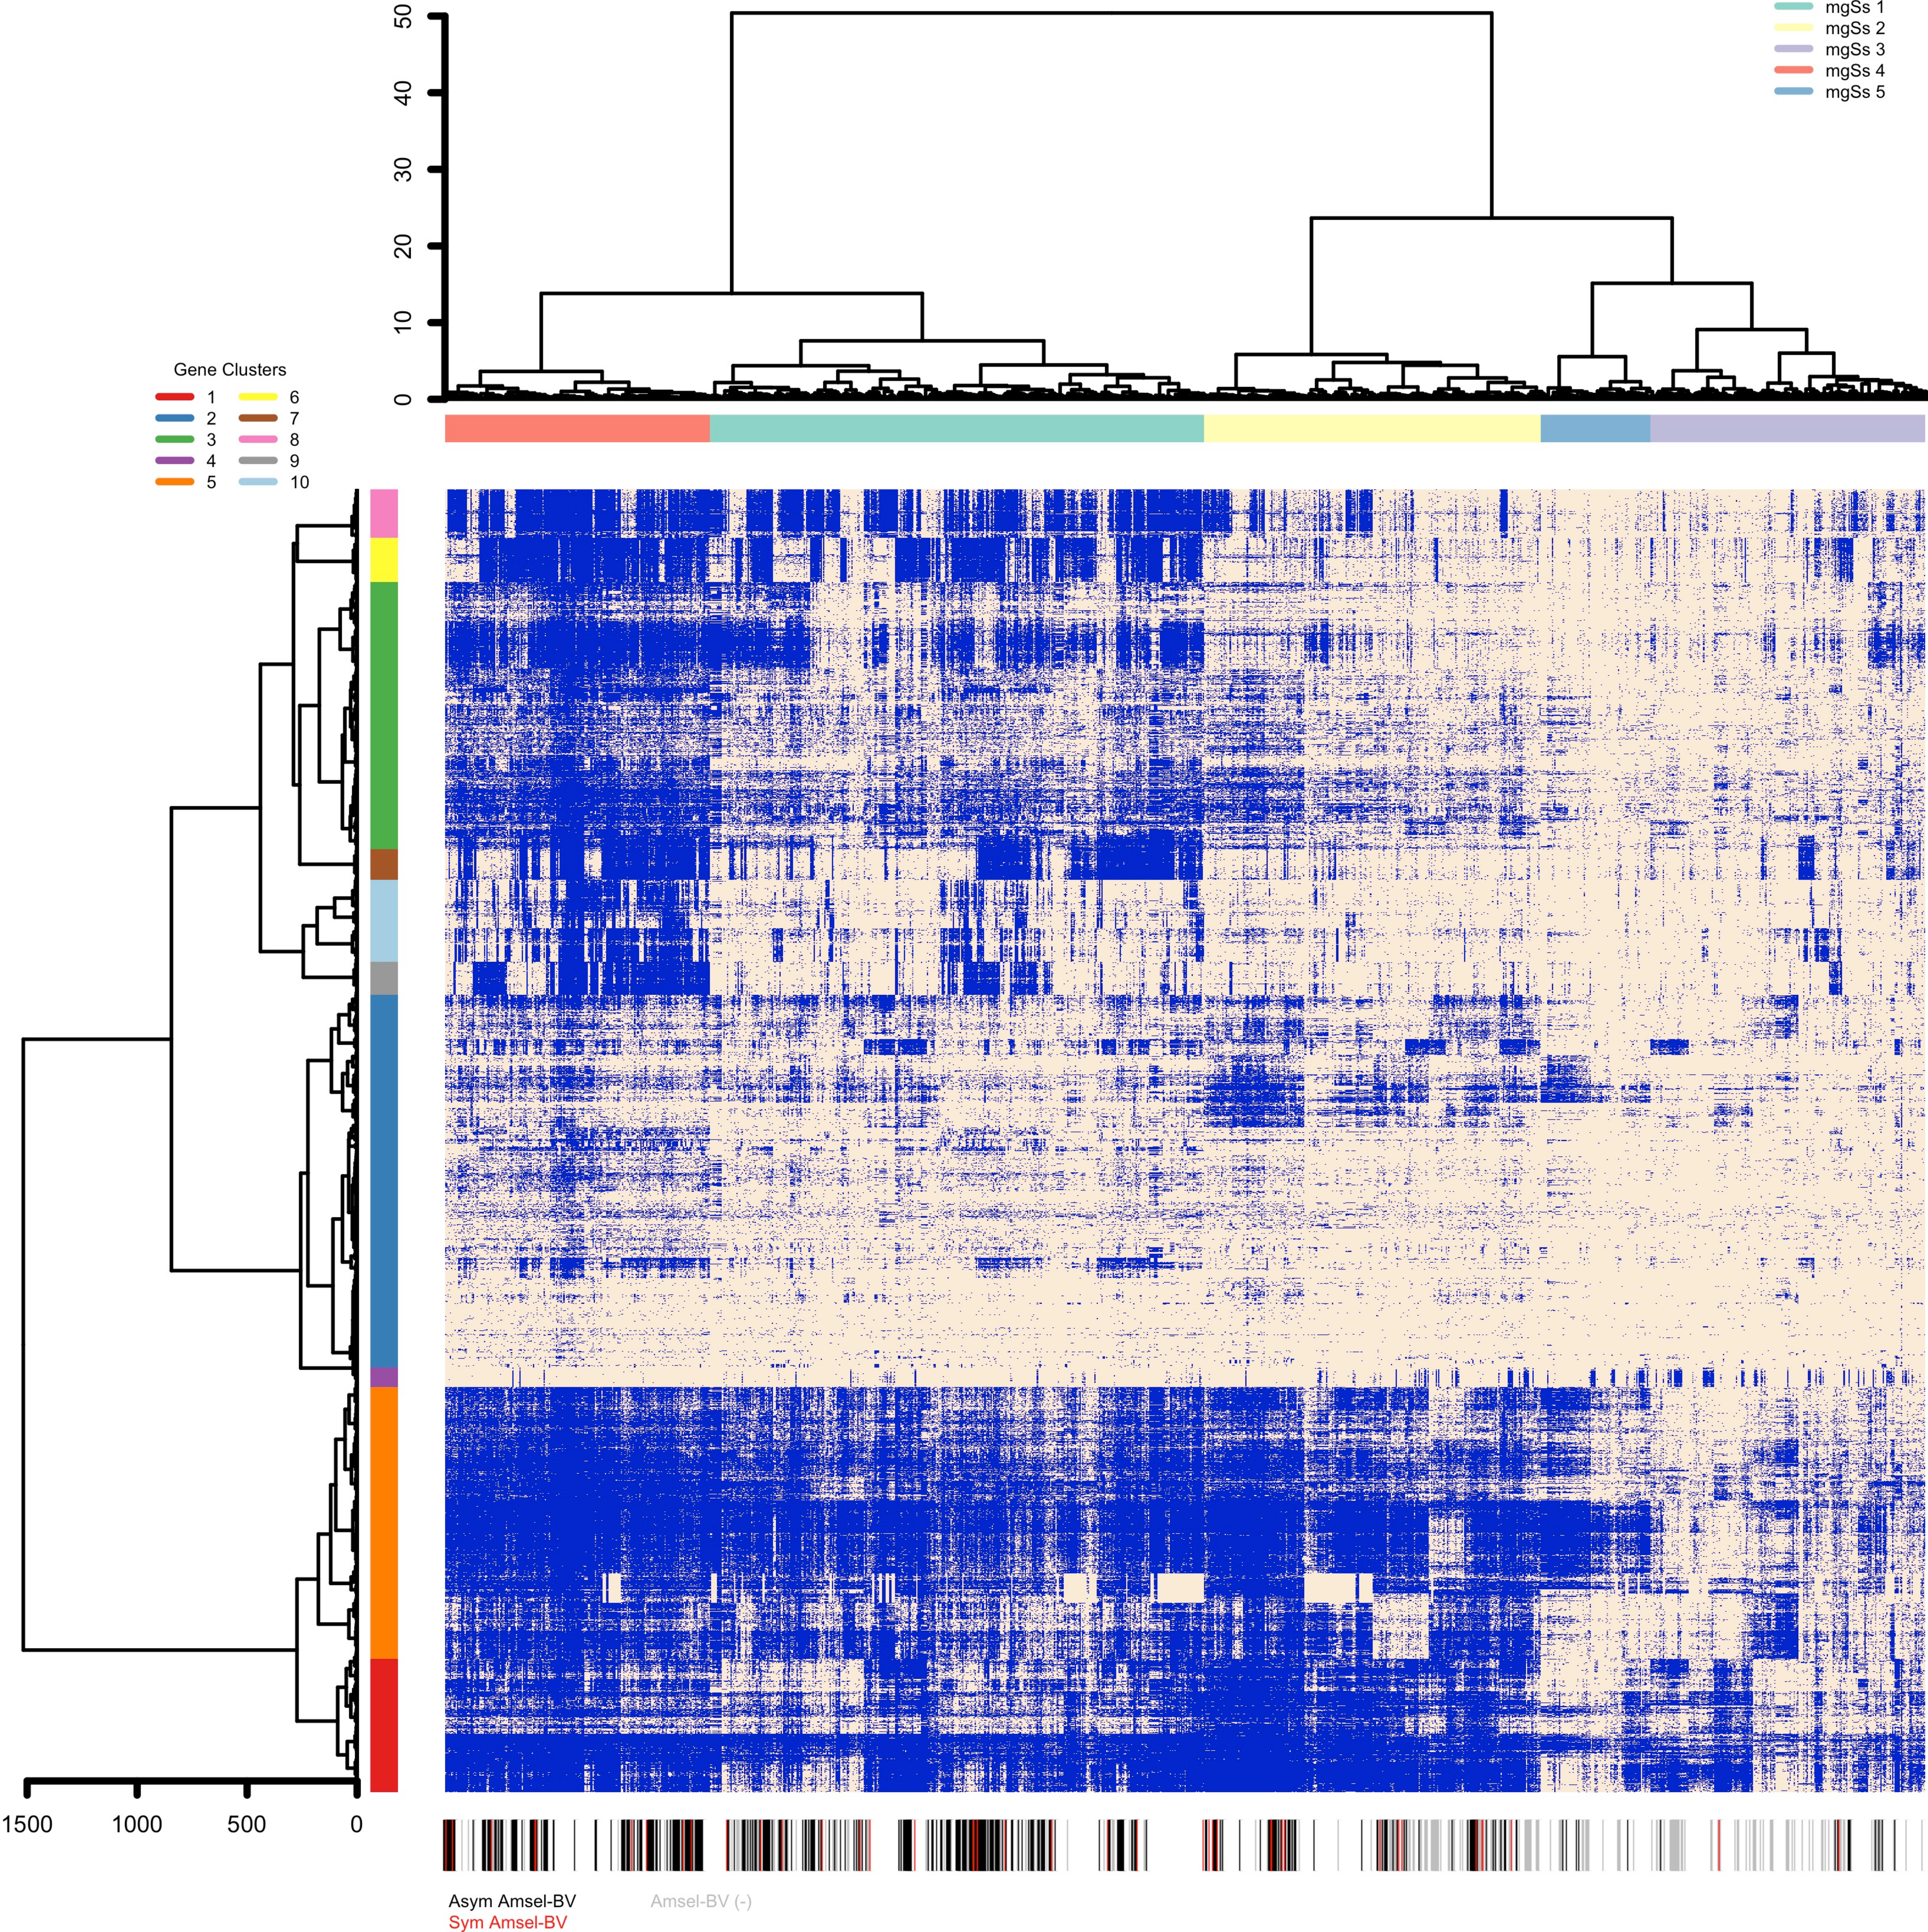

Lactobacillus crispatus mgSs  
Number of Samples=564, Number of Genes=6455

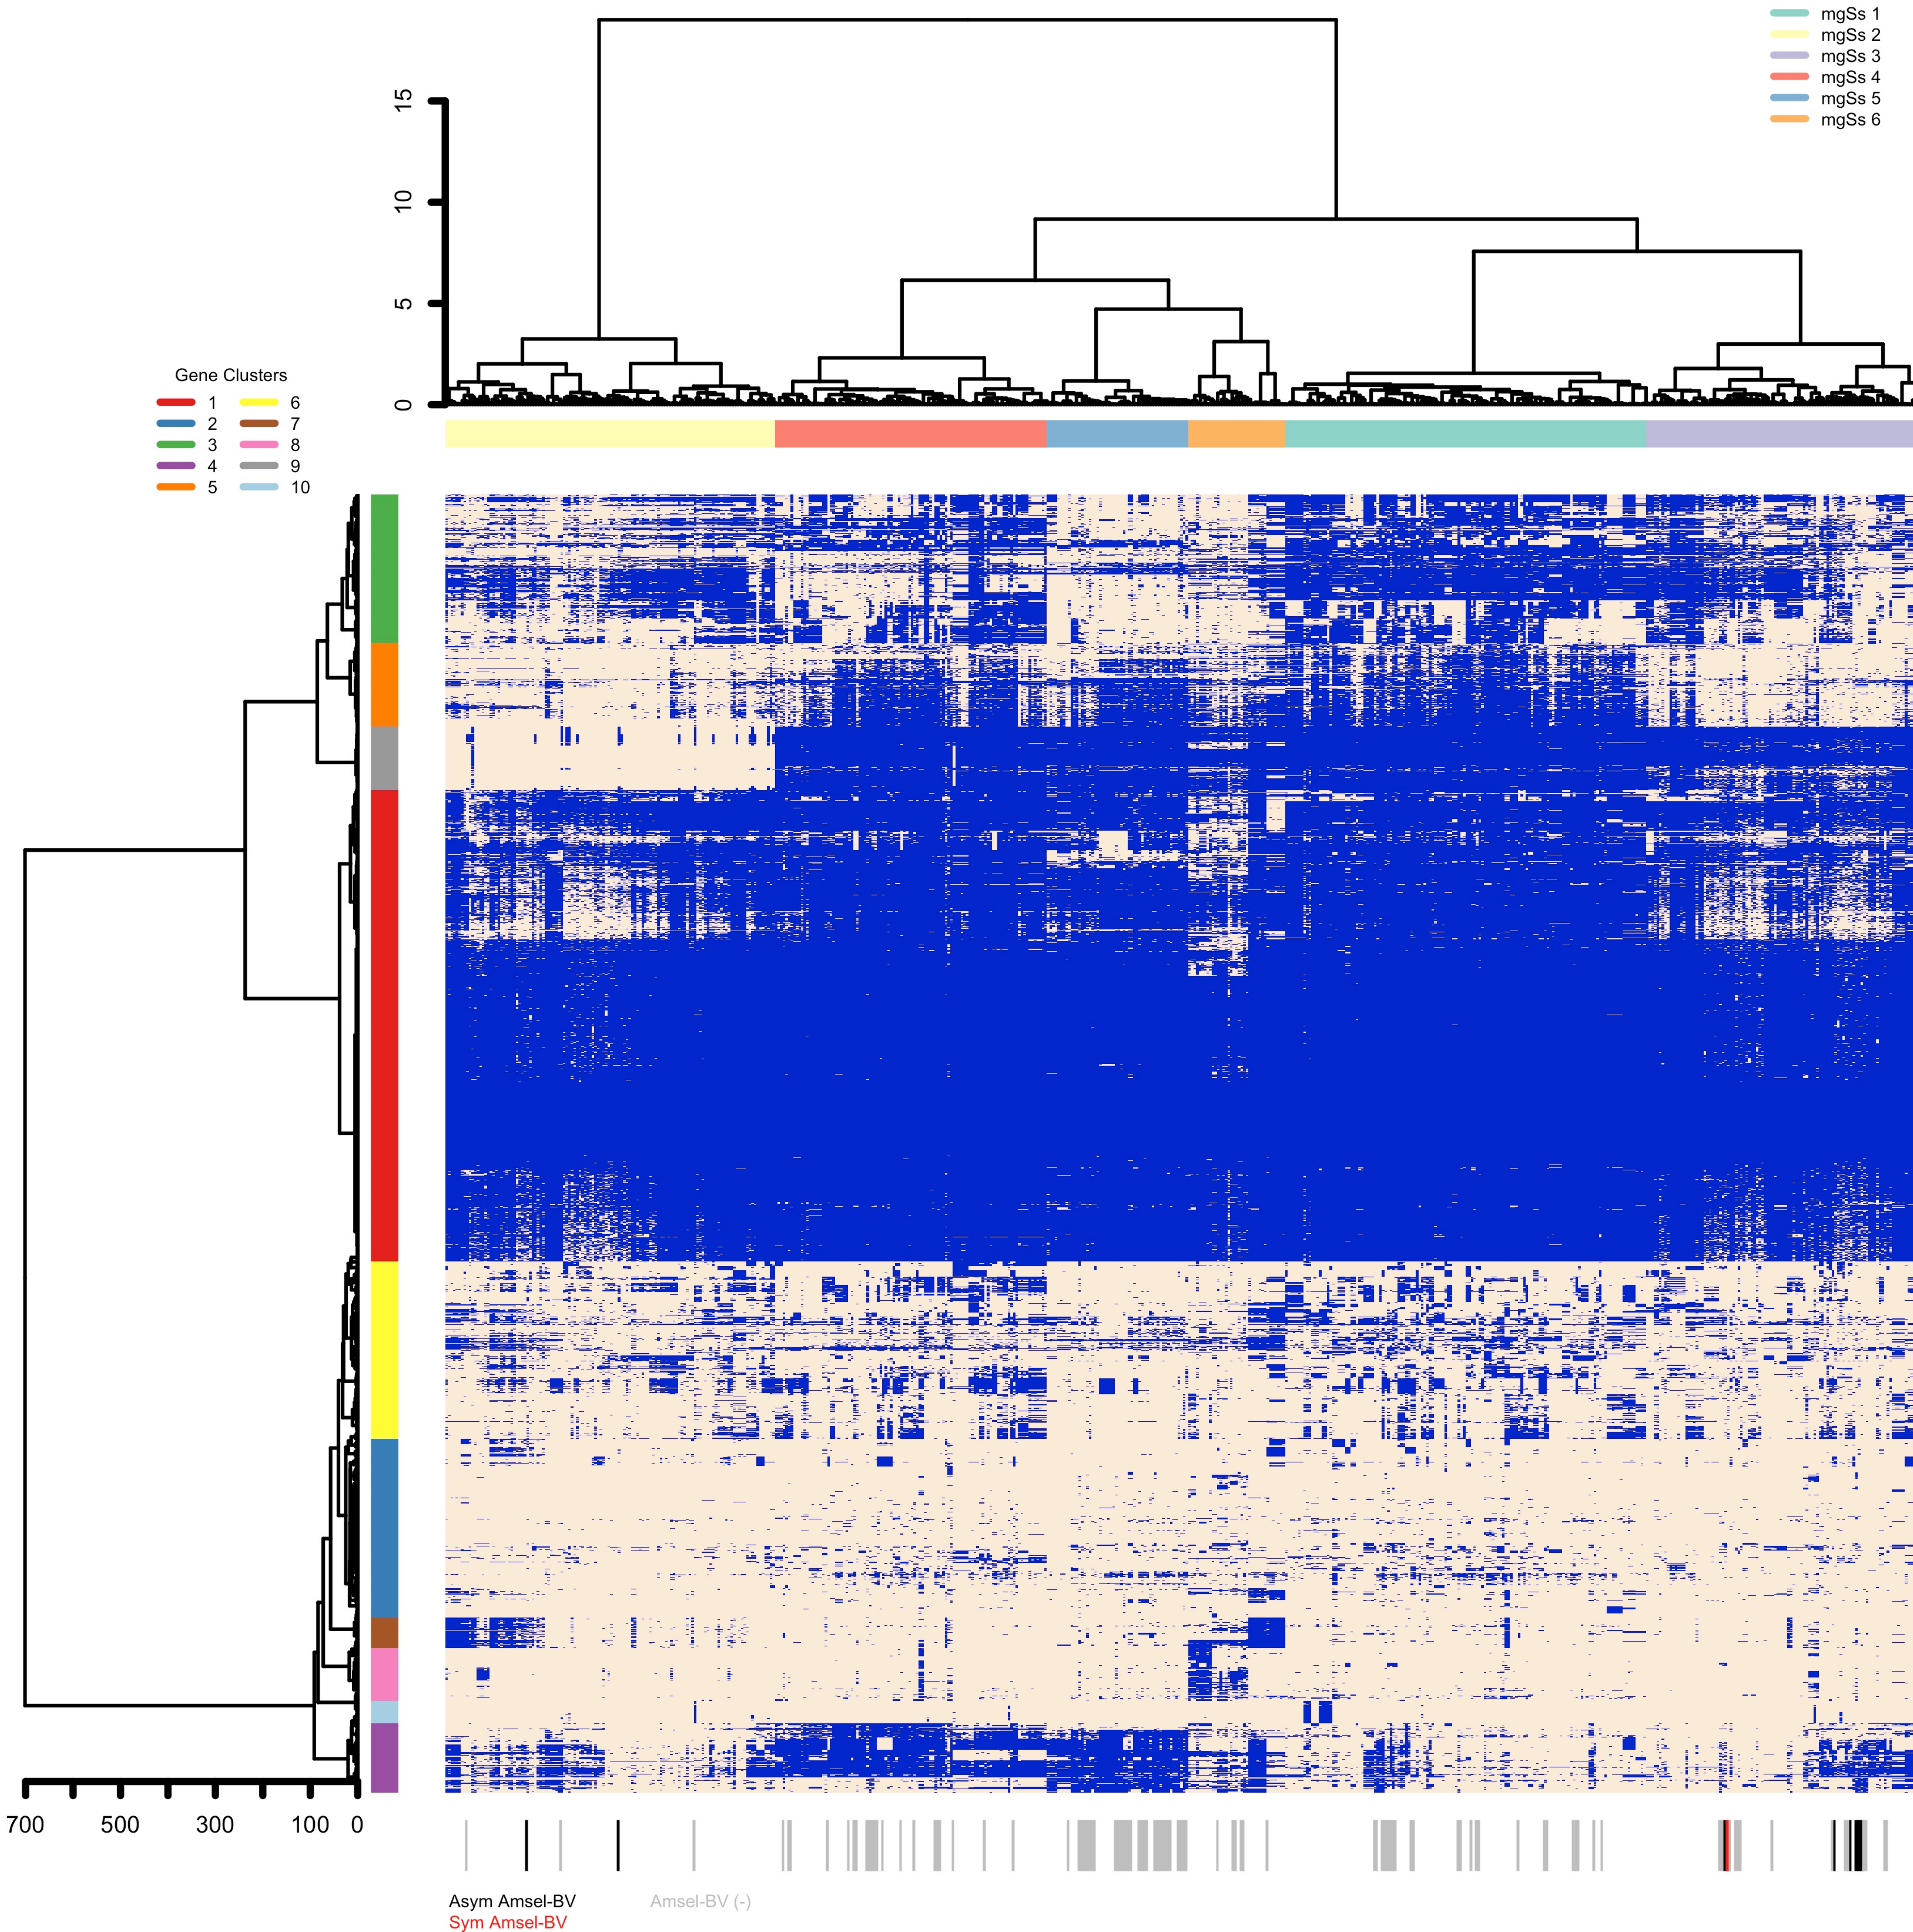

Lactobacillus gasseri mgSs  
Number of Samples=229, Number of Genes=4456

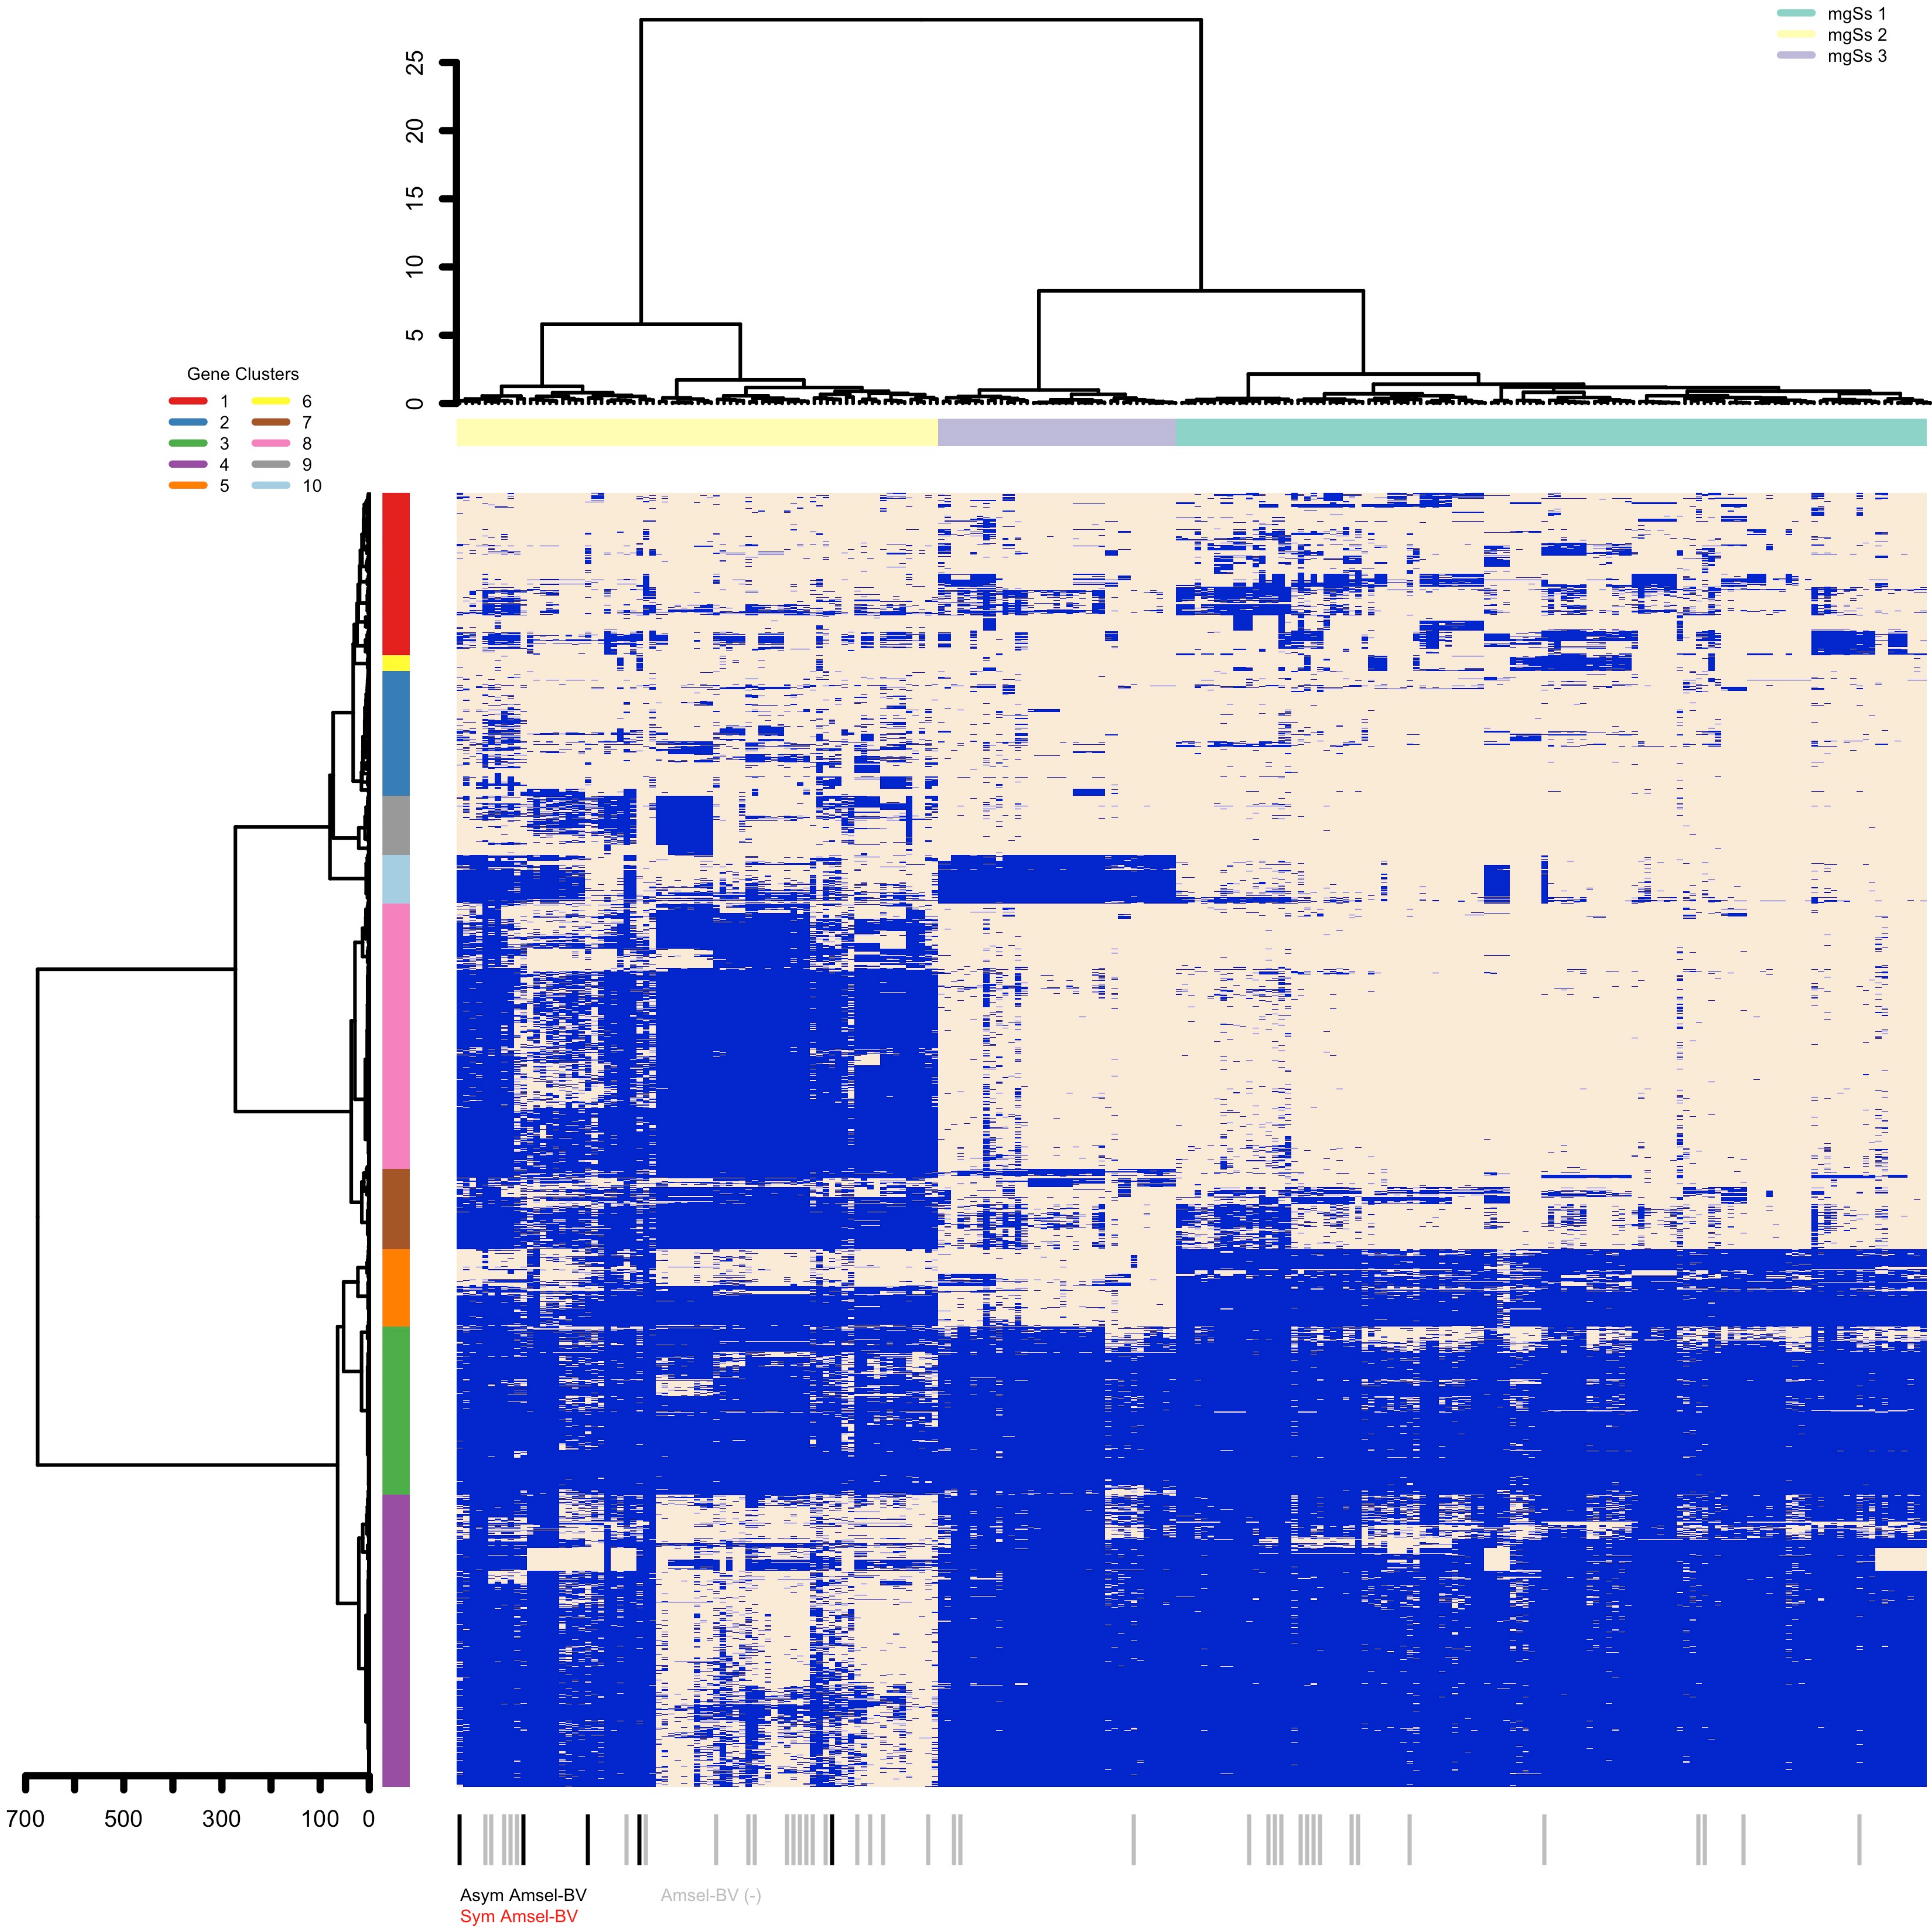

Lactobacillus iners mgSs  
Number of Samples=1325, Number of Genes=5011

- mgSs 1
- mgSs 2
- mgSs 3
- mgSs 4
- mgSs 5
- mgSs 6

- Gene Clusters
- 1
  - 2
  - 3
  - 4
  - 5
  - 6
  - 7
  - 8
  - 9
  - 10

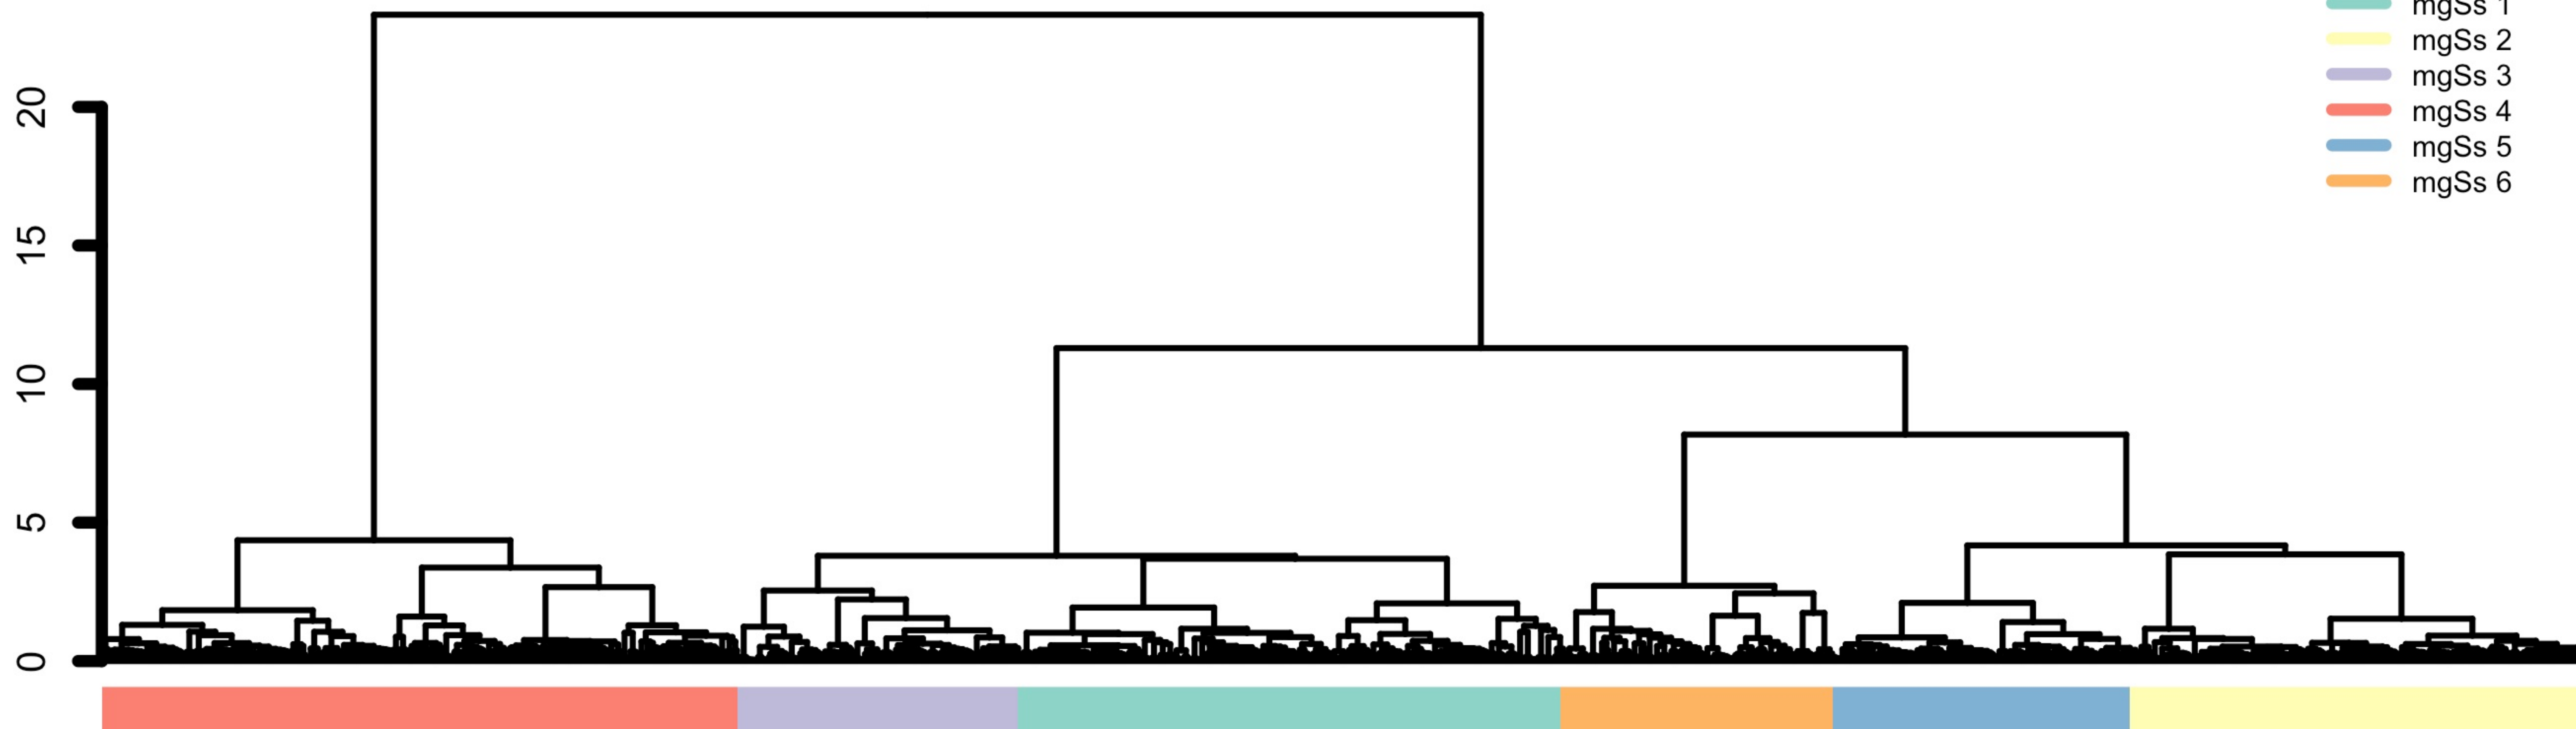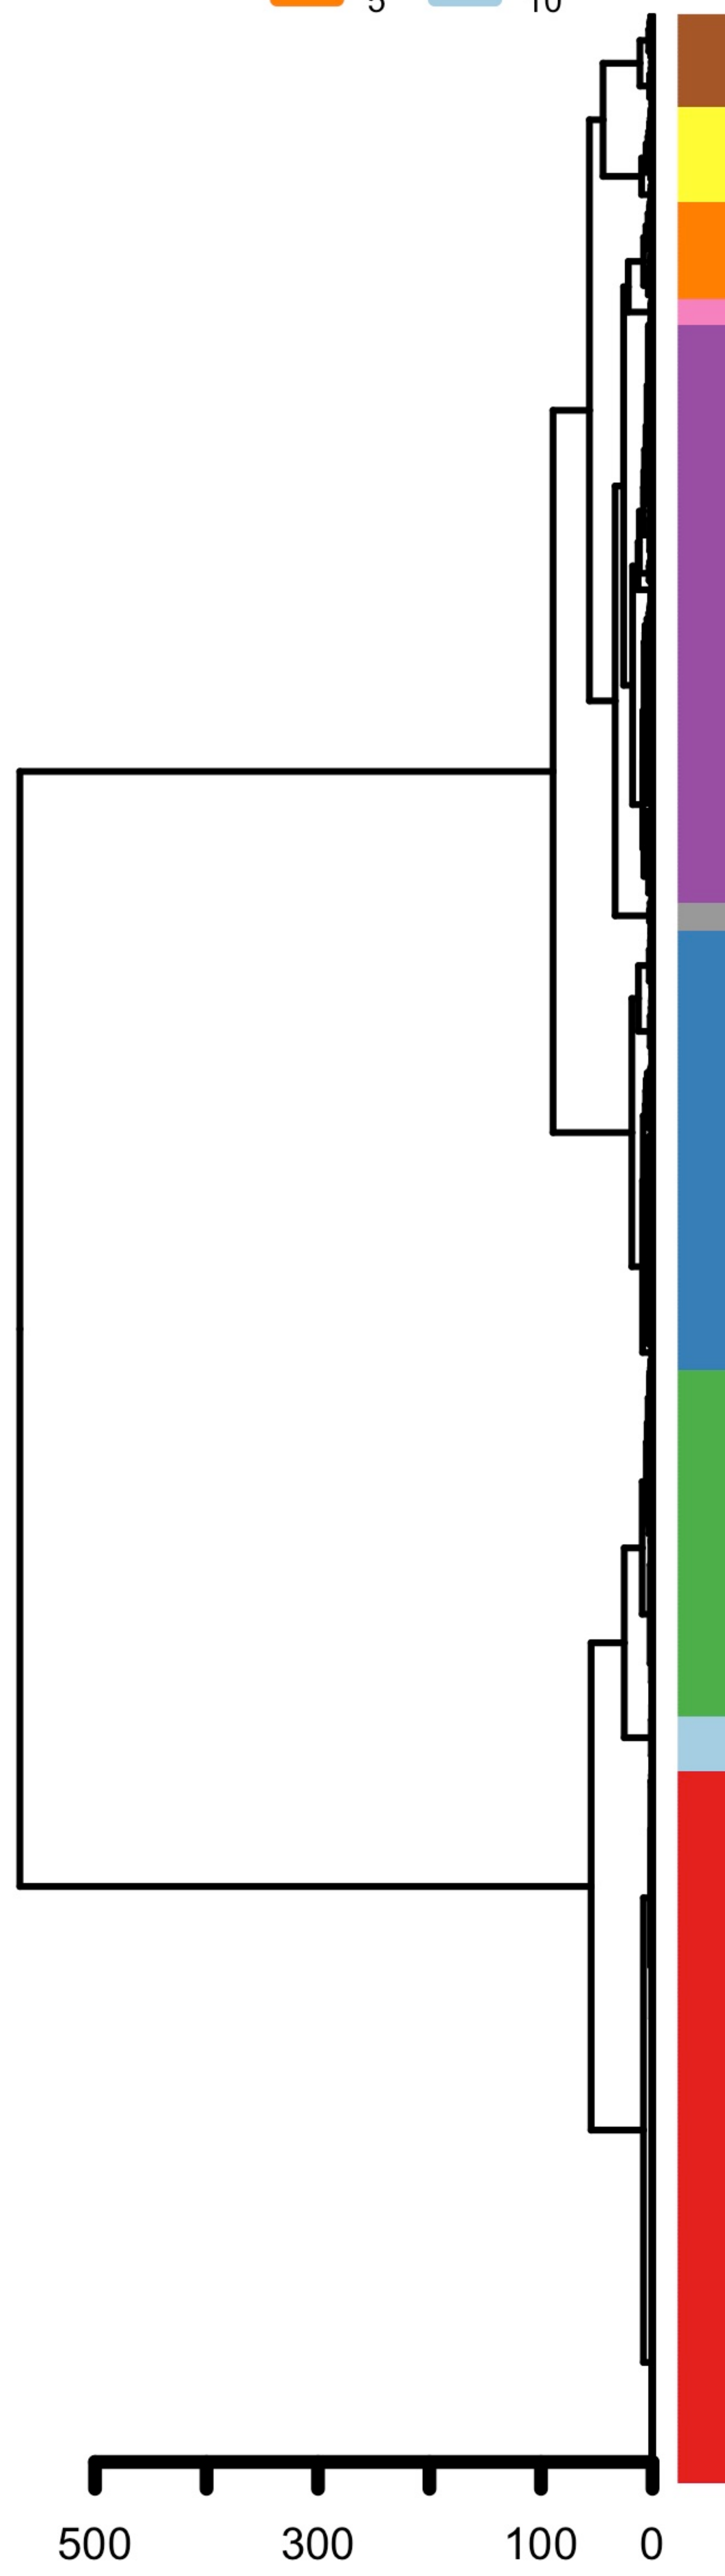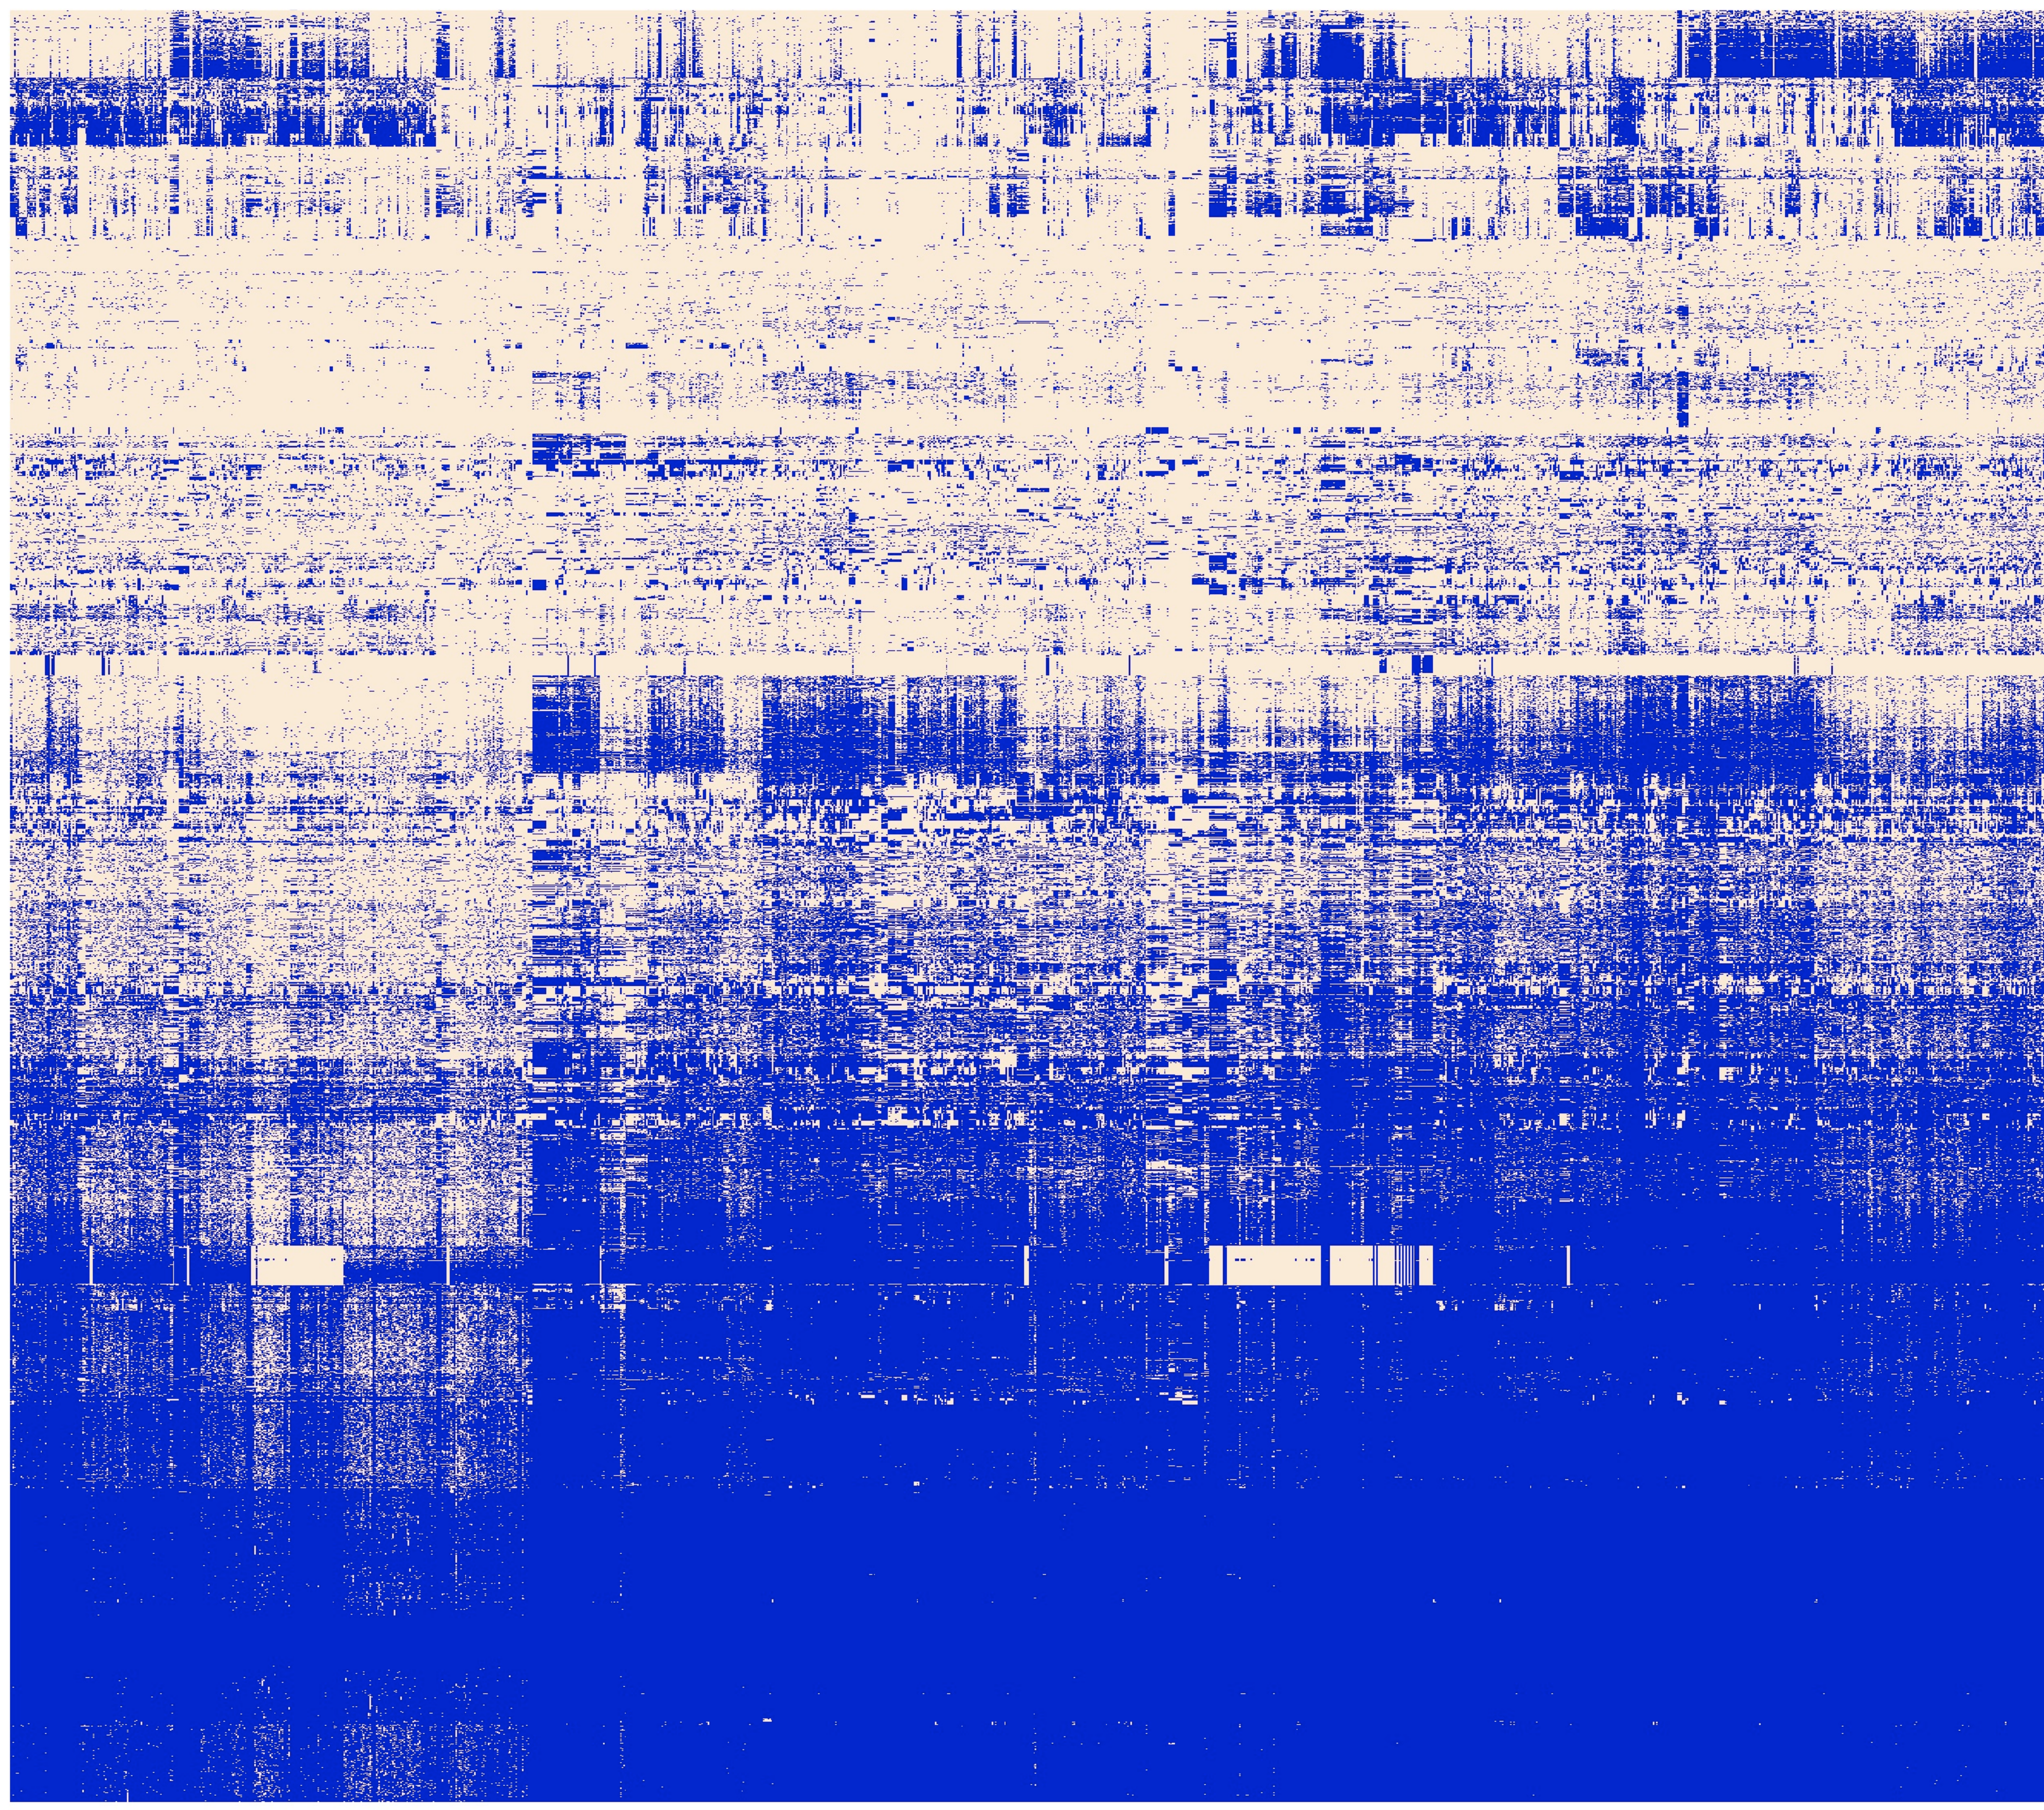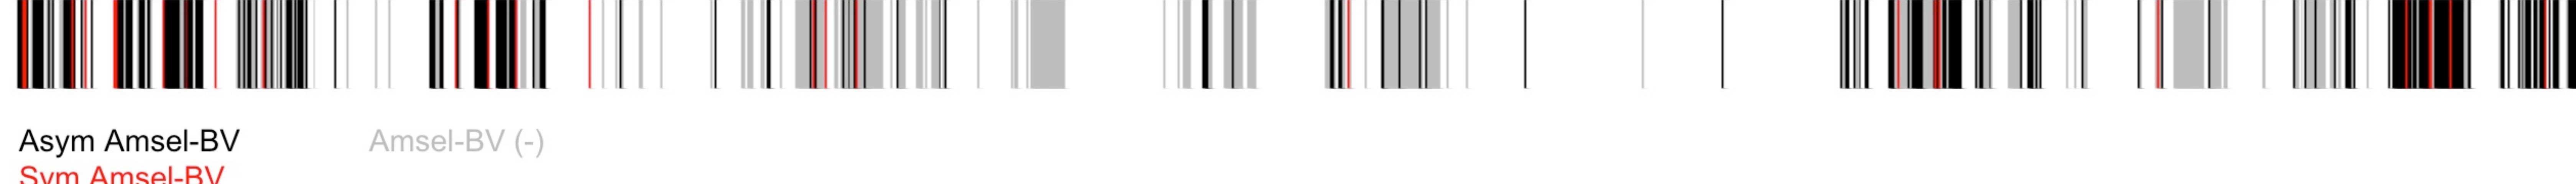

Asym Amsel-BV  
Sym Amsel-BV

Amsel-BV (-)

Megasphaera genomosp. mgSs  
Number of Samples=326, Number of Genes=3086

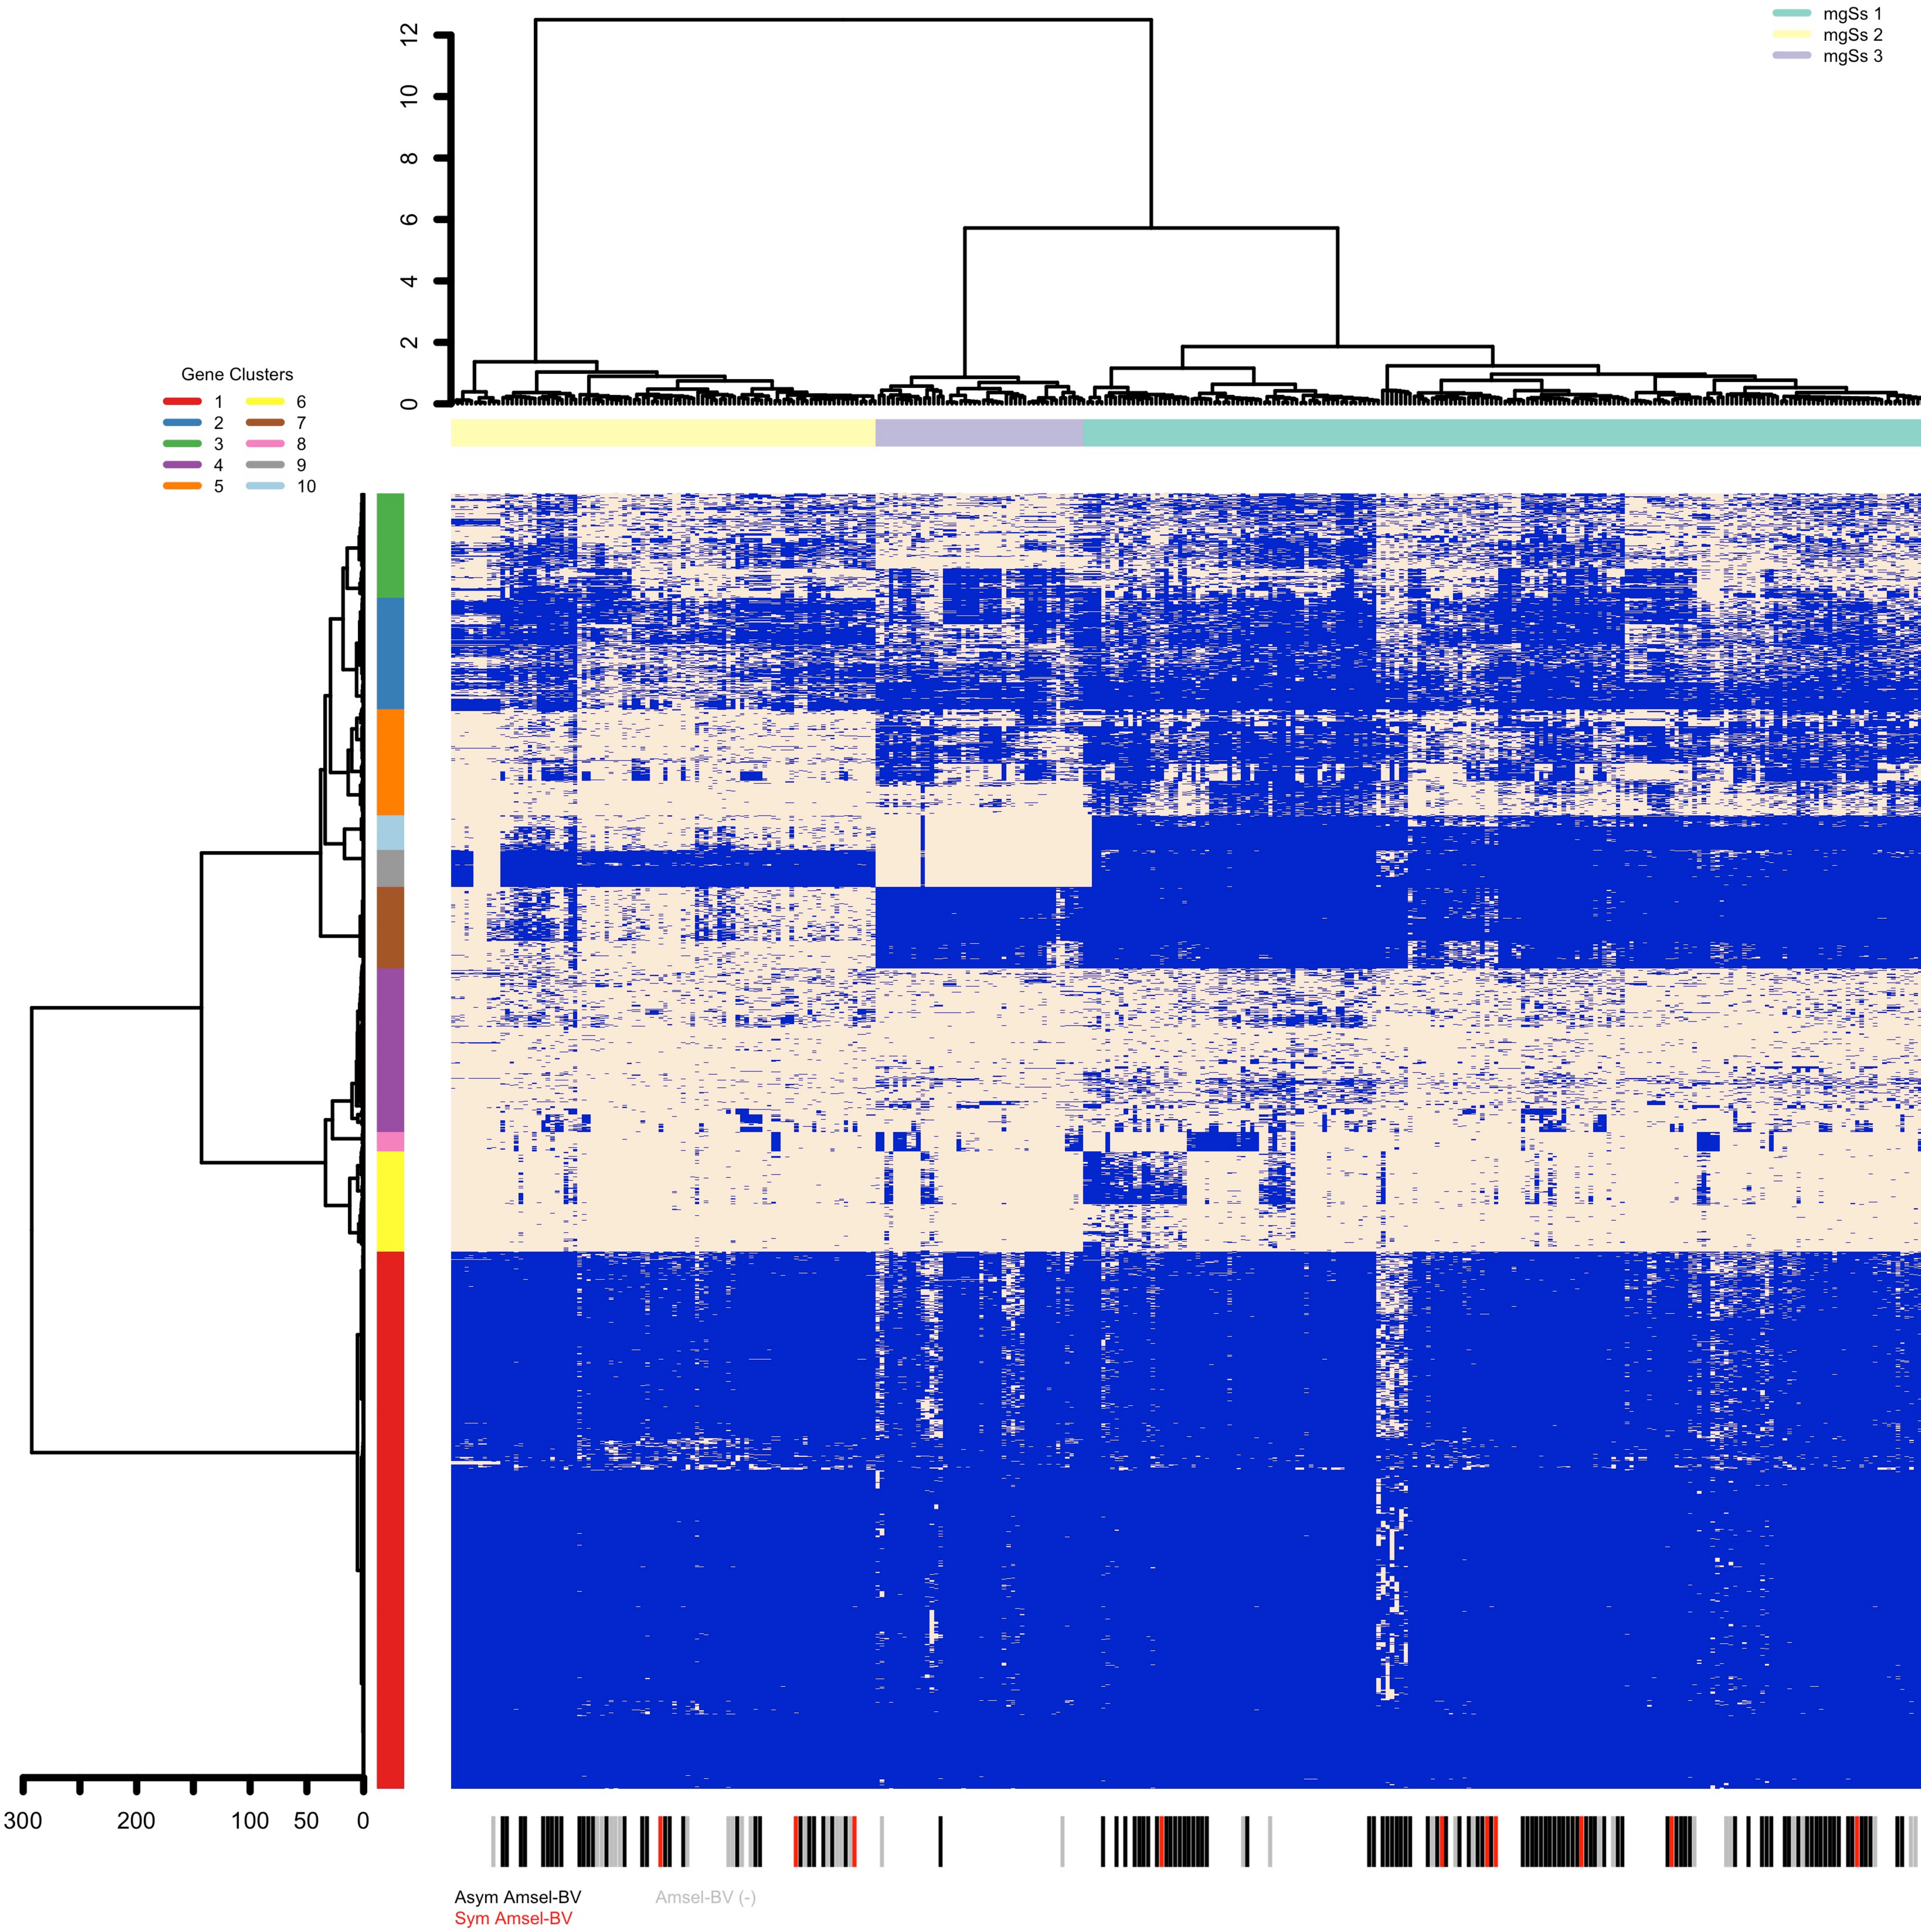

Mobiluncus curtisii mgSs  
Number of Samples=78, Number of Genes=2646

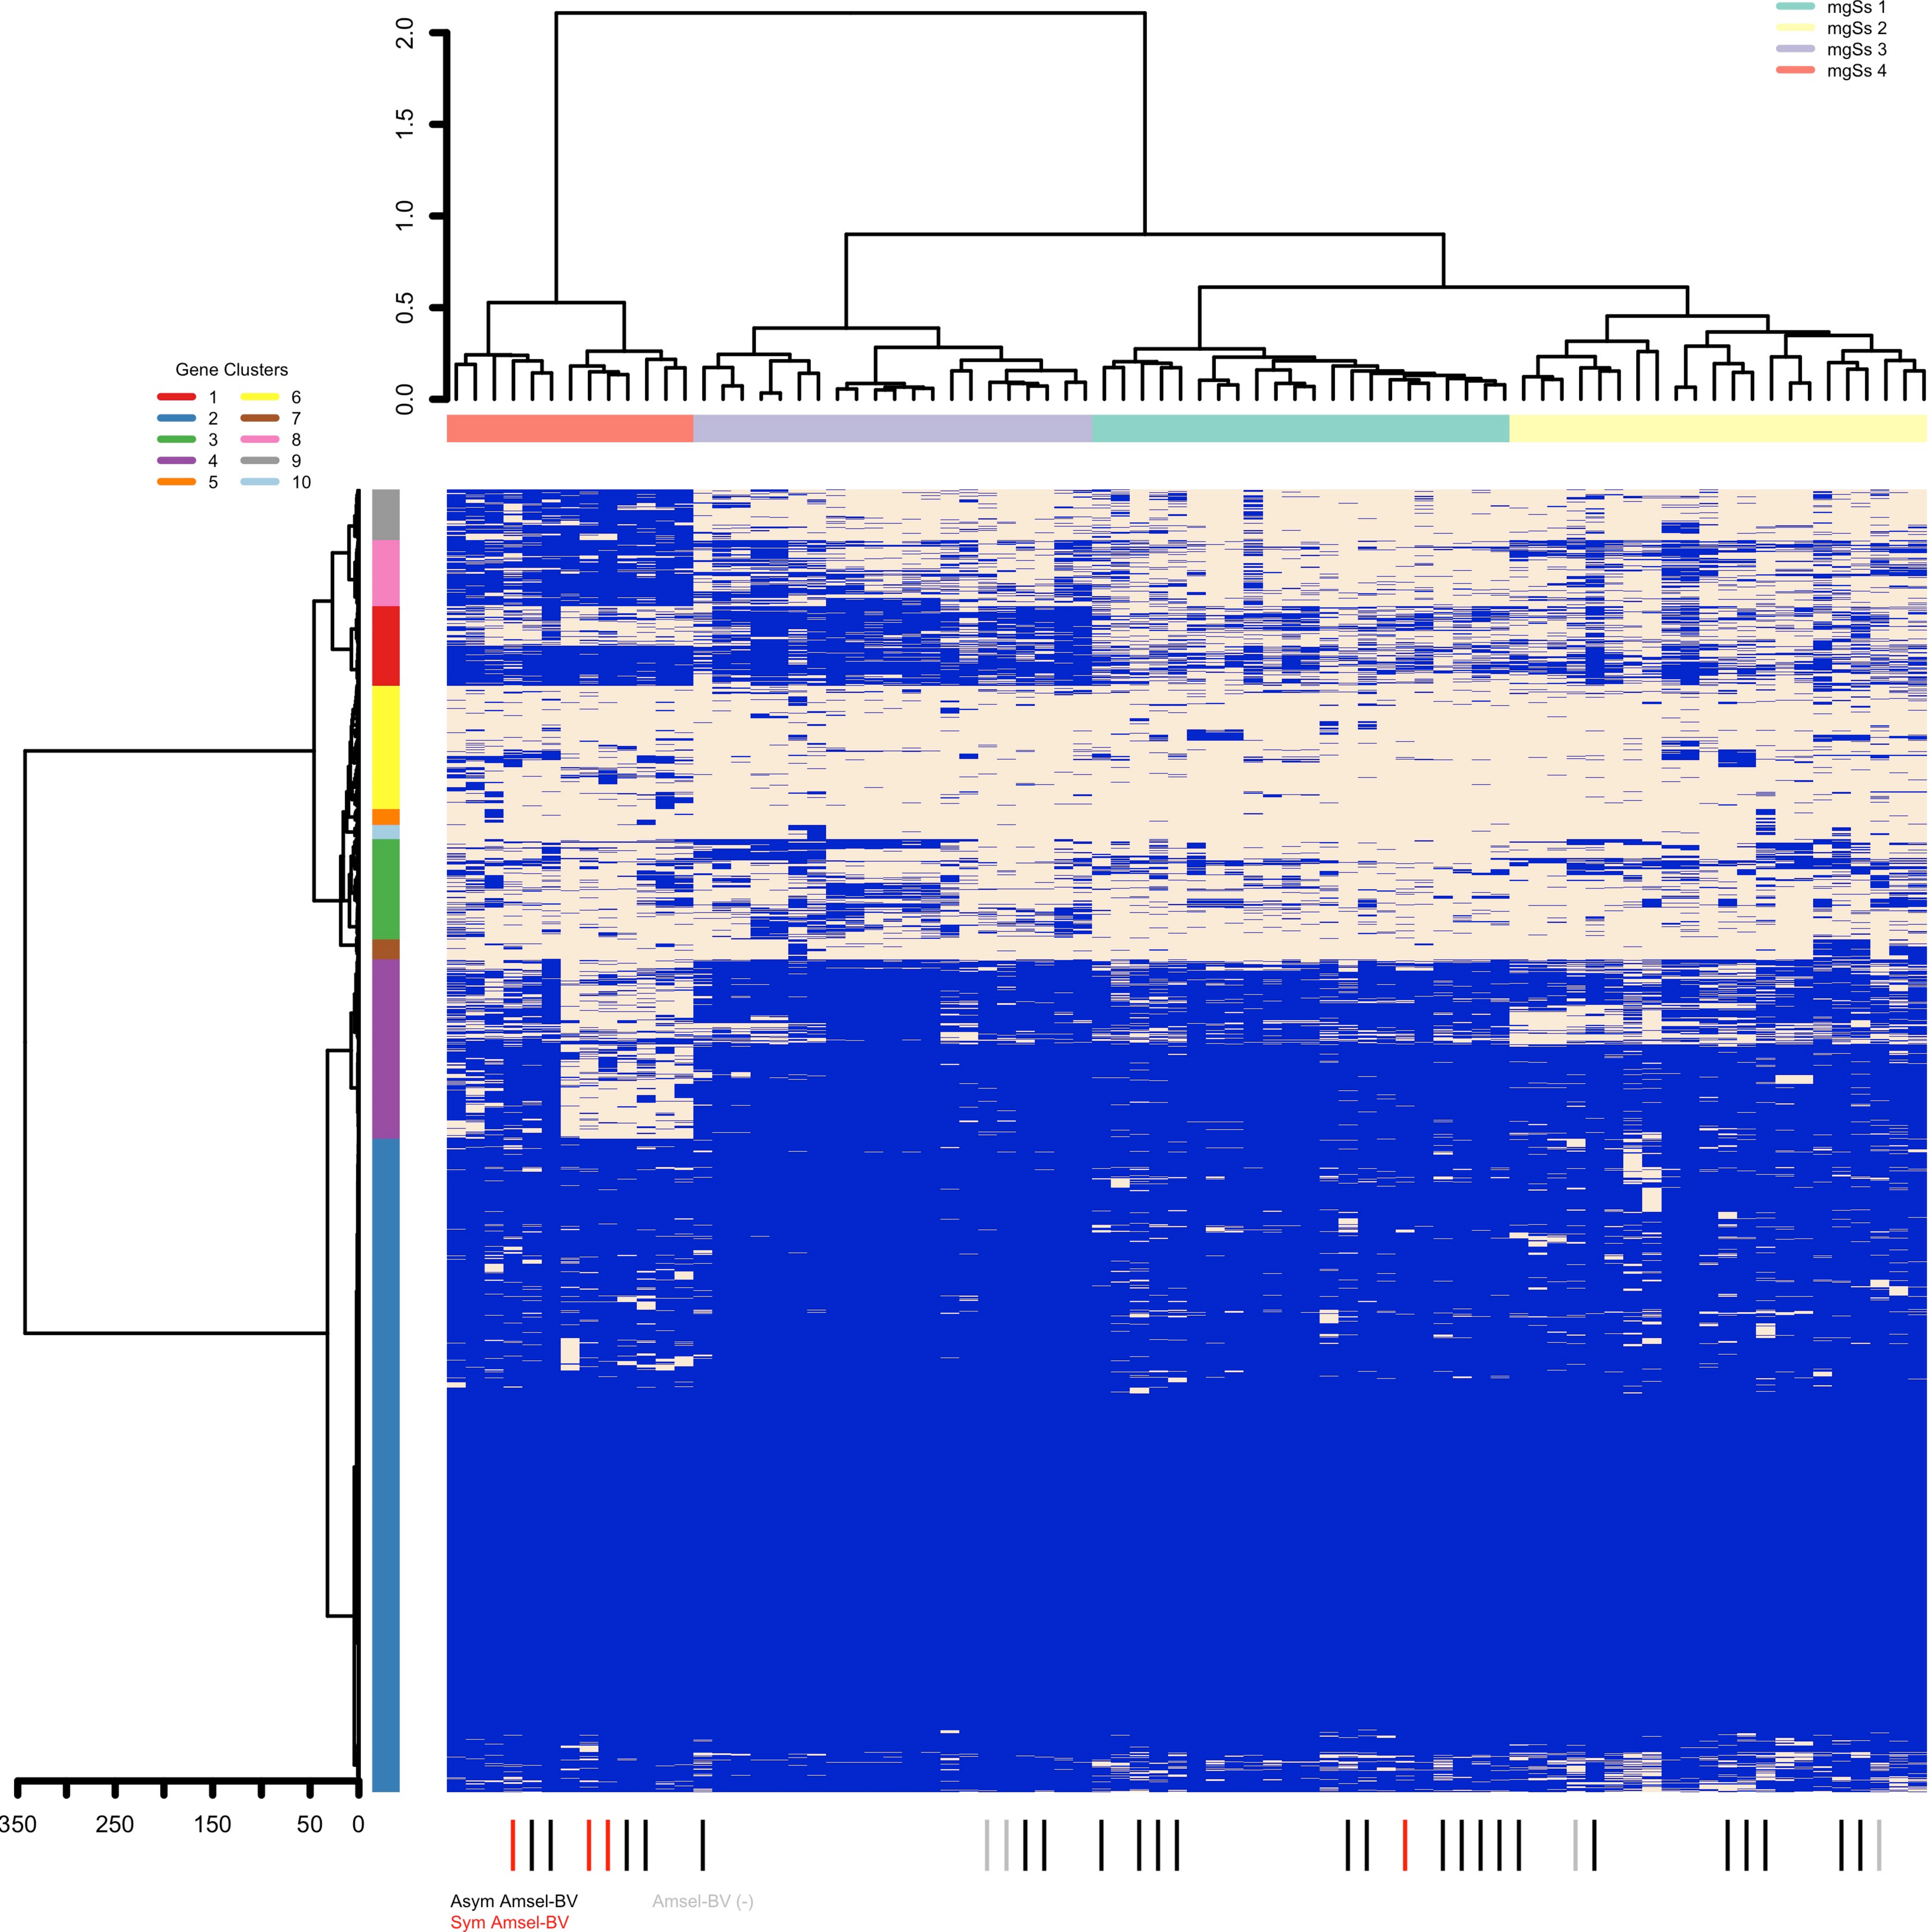

Mobiluncus mulieris mgSs  
Number of Samples=205, Number of Genes=3978

- mgSs 1
- mgSs 2
- mgSs 3
- mgSs 4
- mgSs 5

- Gene Clusters
- 1
  - 2
  - 3
  - 4
  - 5
  - 6
  - 7
  - 8
  - 9
  - 10

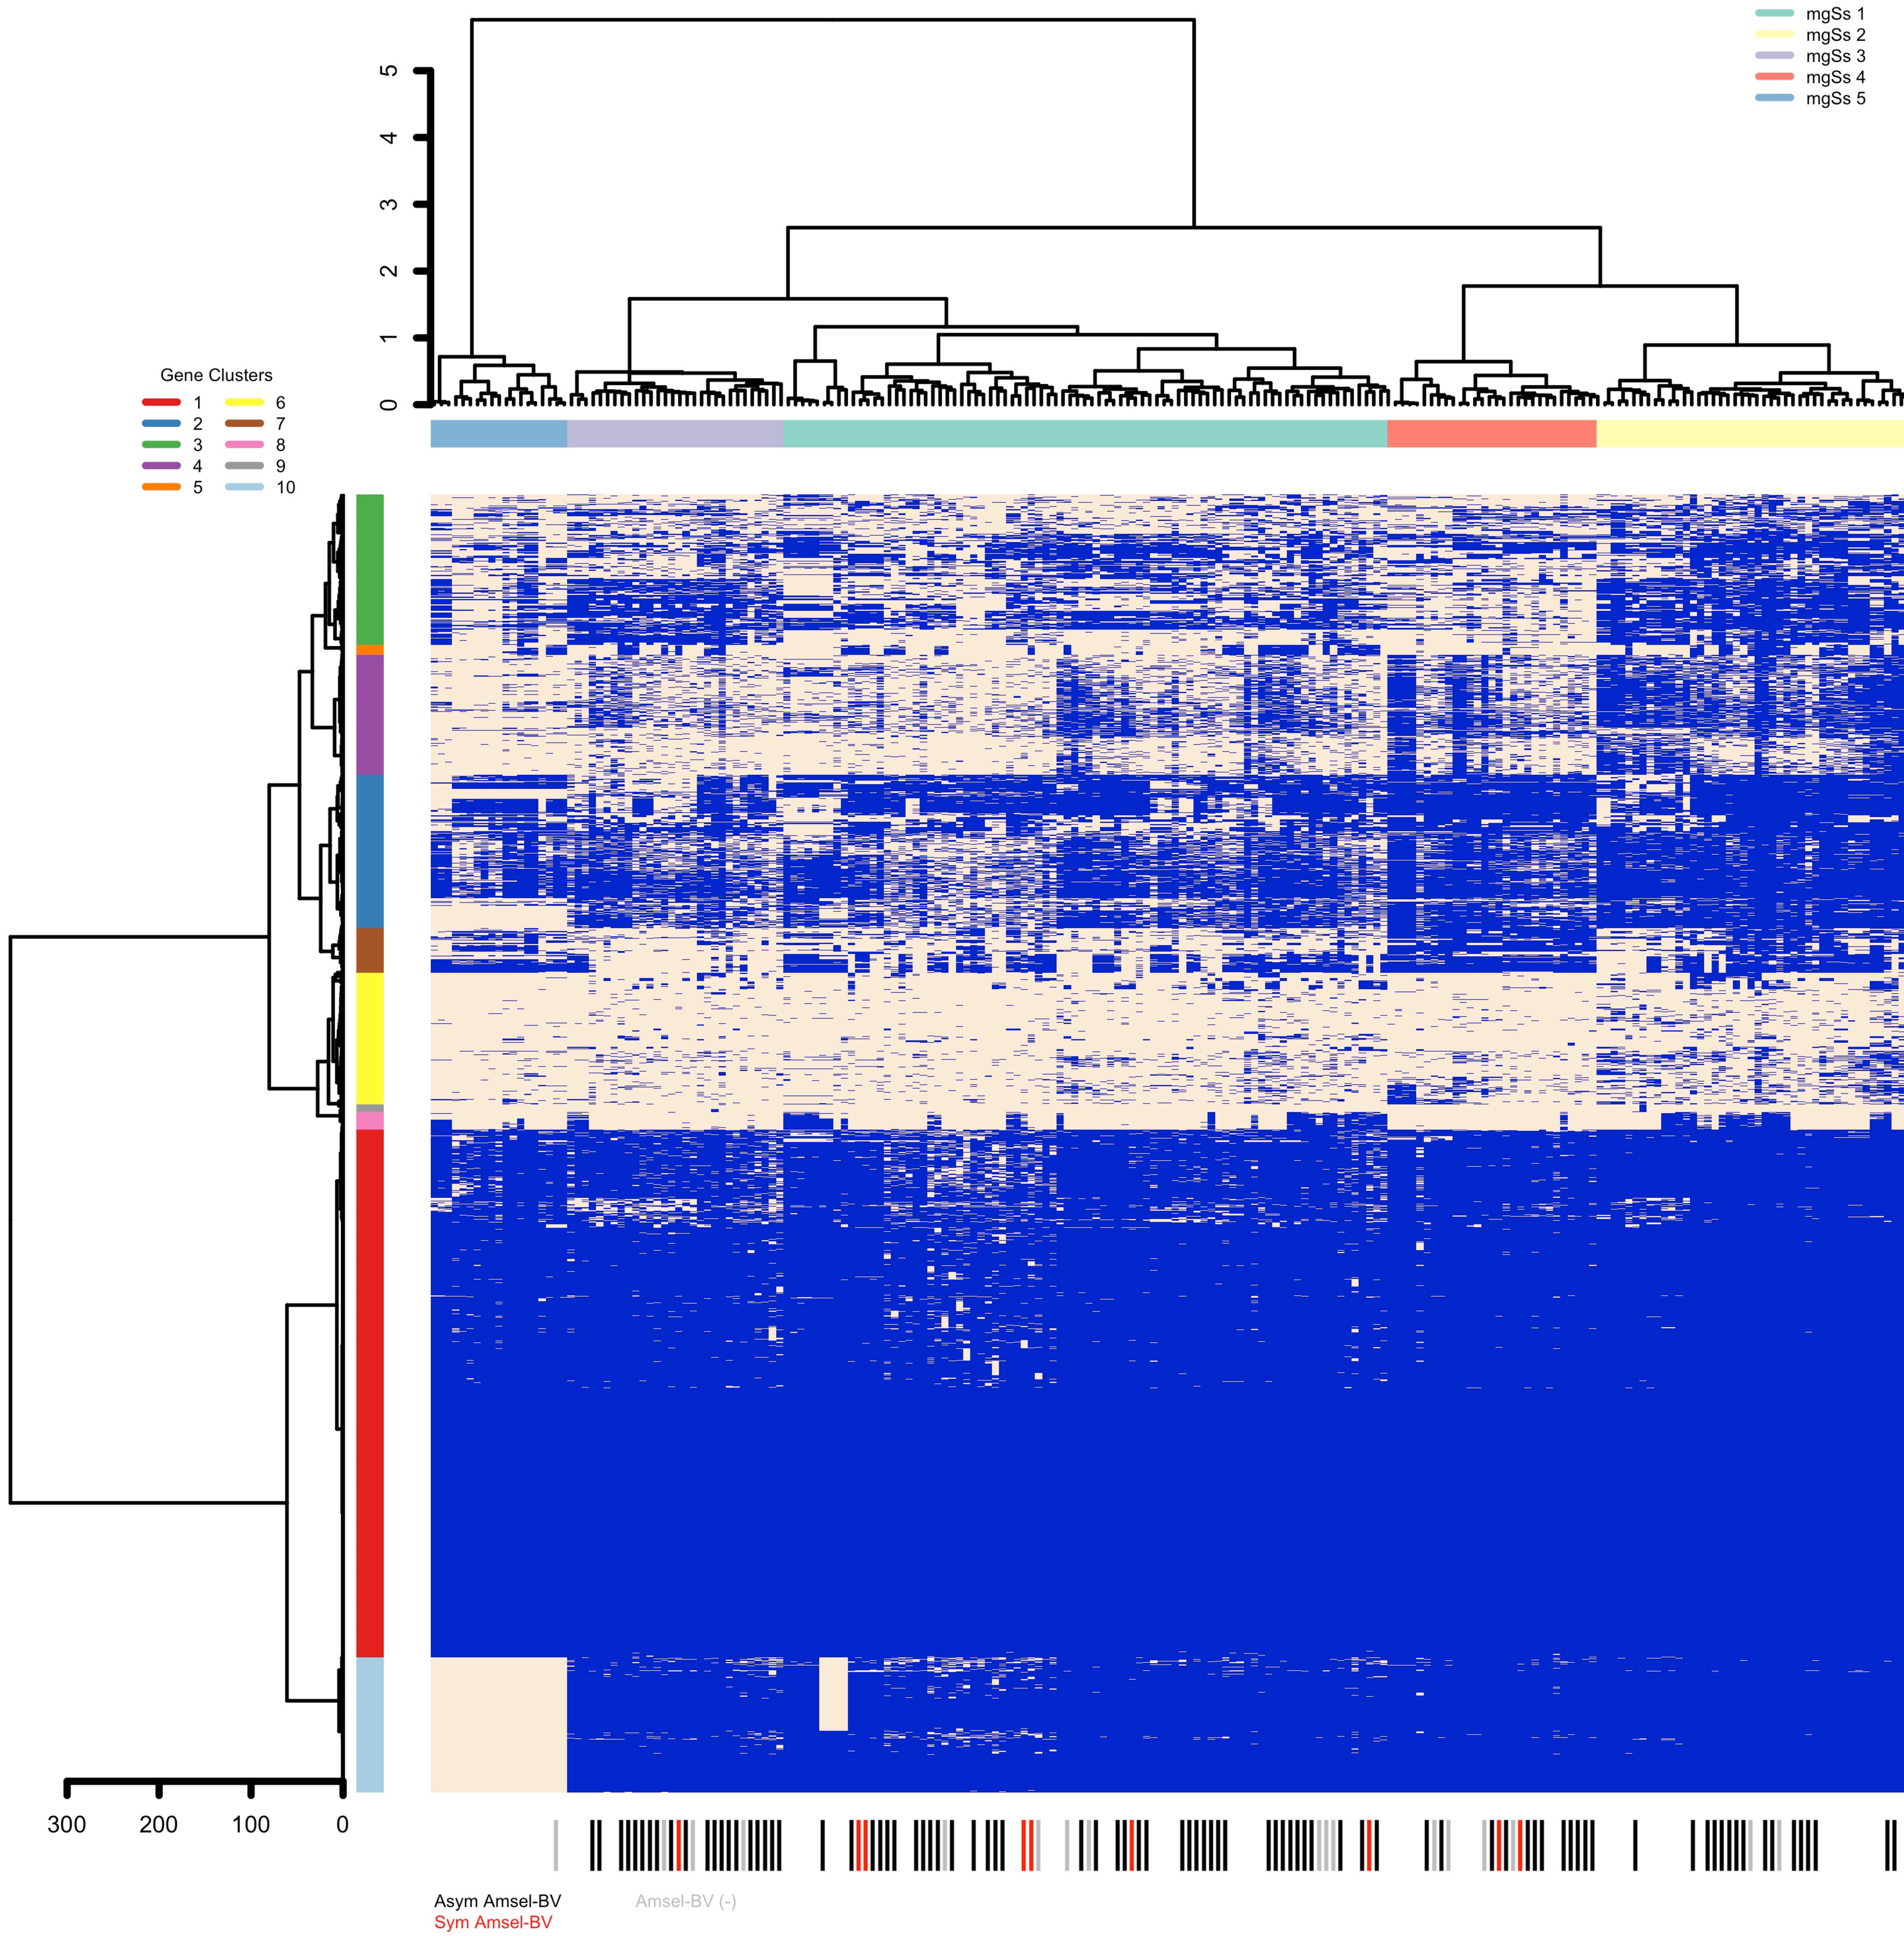

Mycoplasma hominis mgSs  
Number of Samples=152, Number of Genes=956

mgSs 1  
mgSs 2  
mgSs 3  
mgSs 4

Gene Clusters  
1 2 3 4 5 6 7 8 9 10

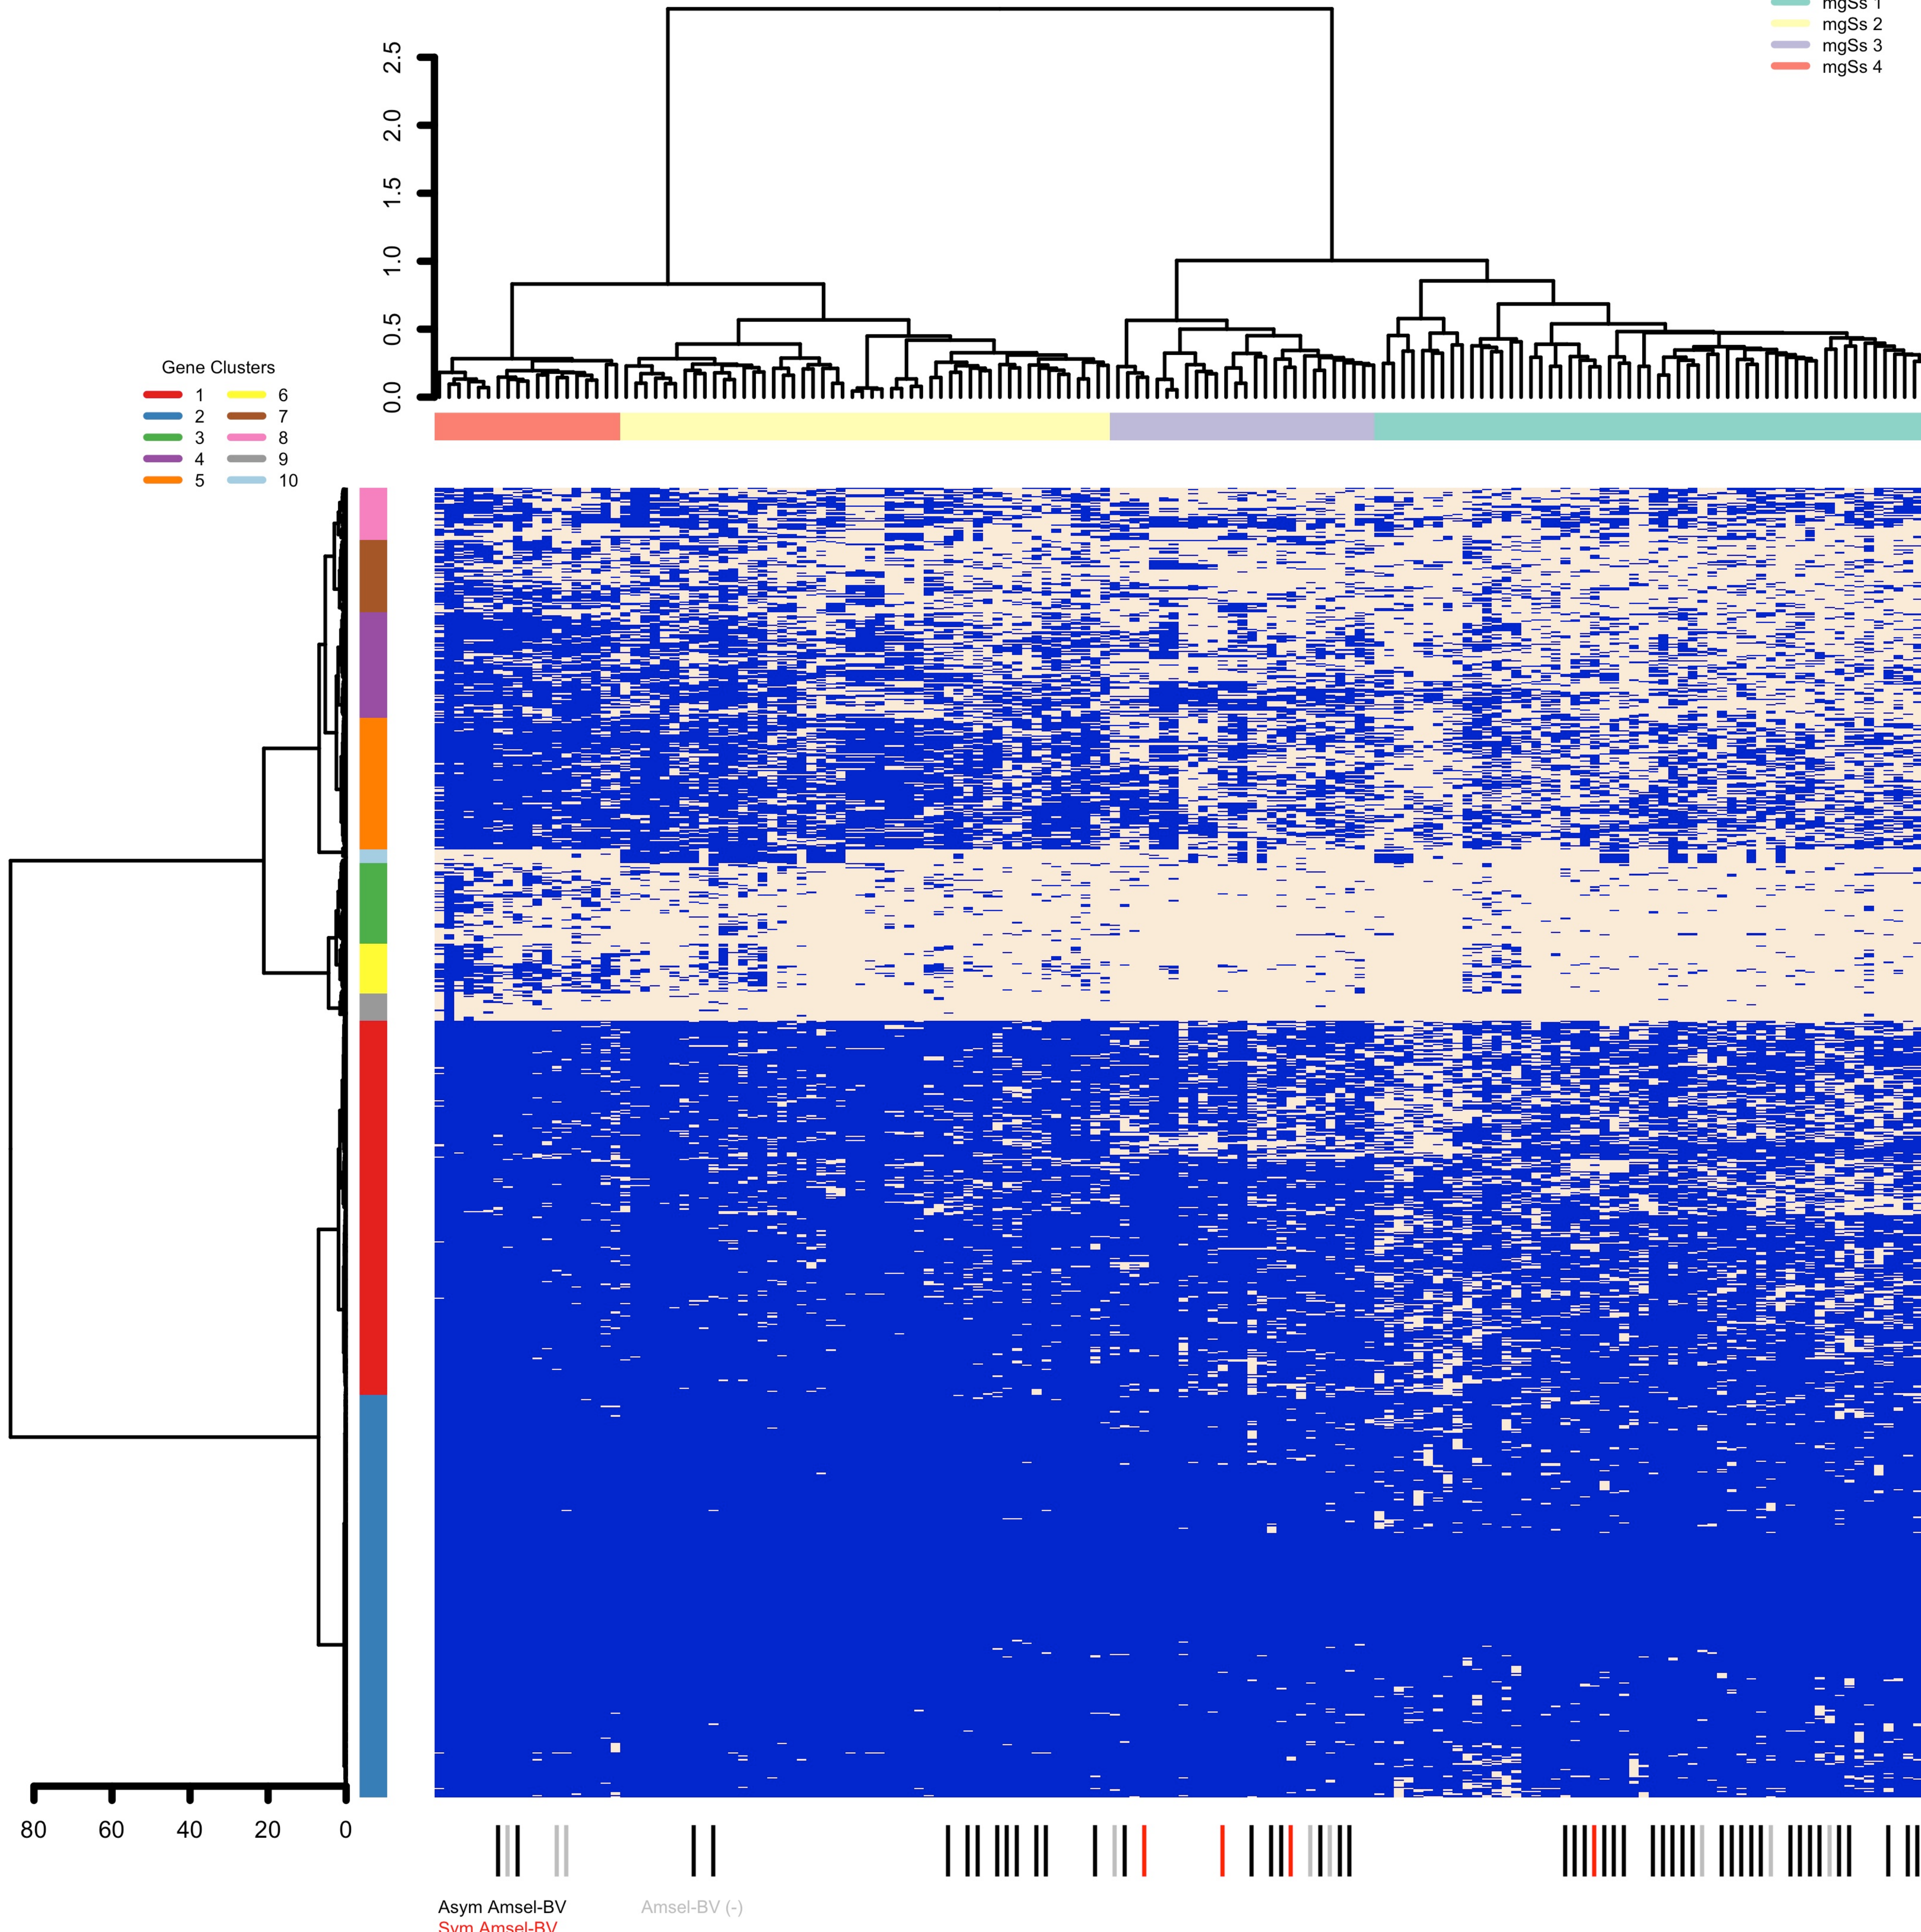

Peptoniphilus harei mgSs  
Number of Samples=55, Number of Genes=2604

mgSs 1  
mgSs 2  
mgSs 3

Gene Clusters

1 6  
2 7  
3 8  
4 9  
5 10

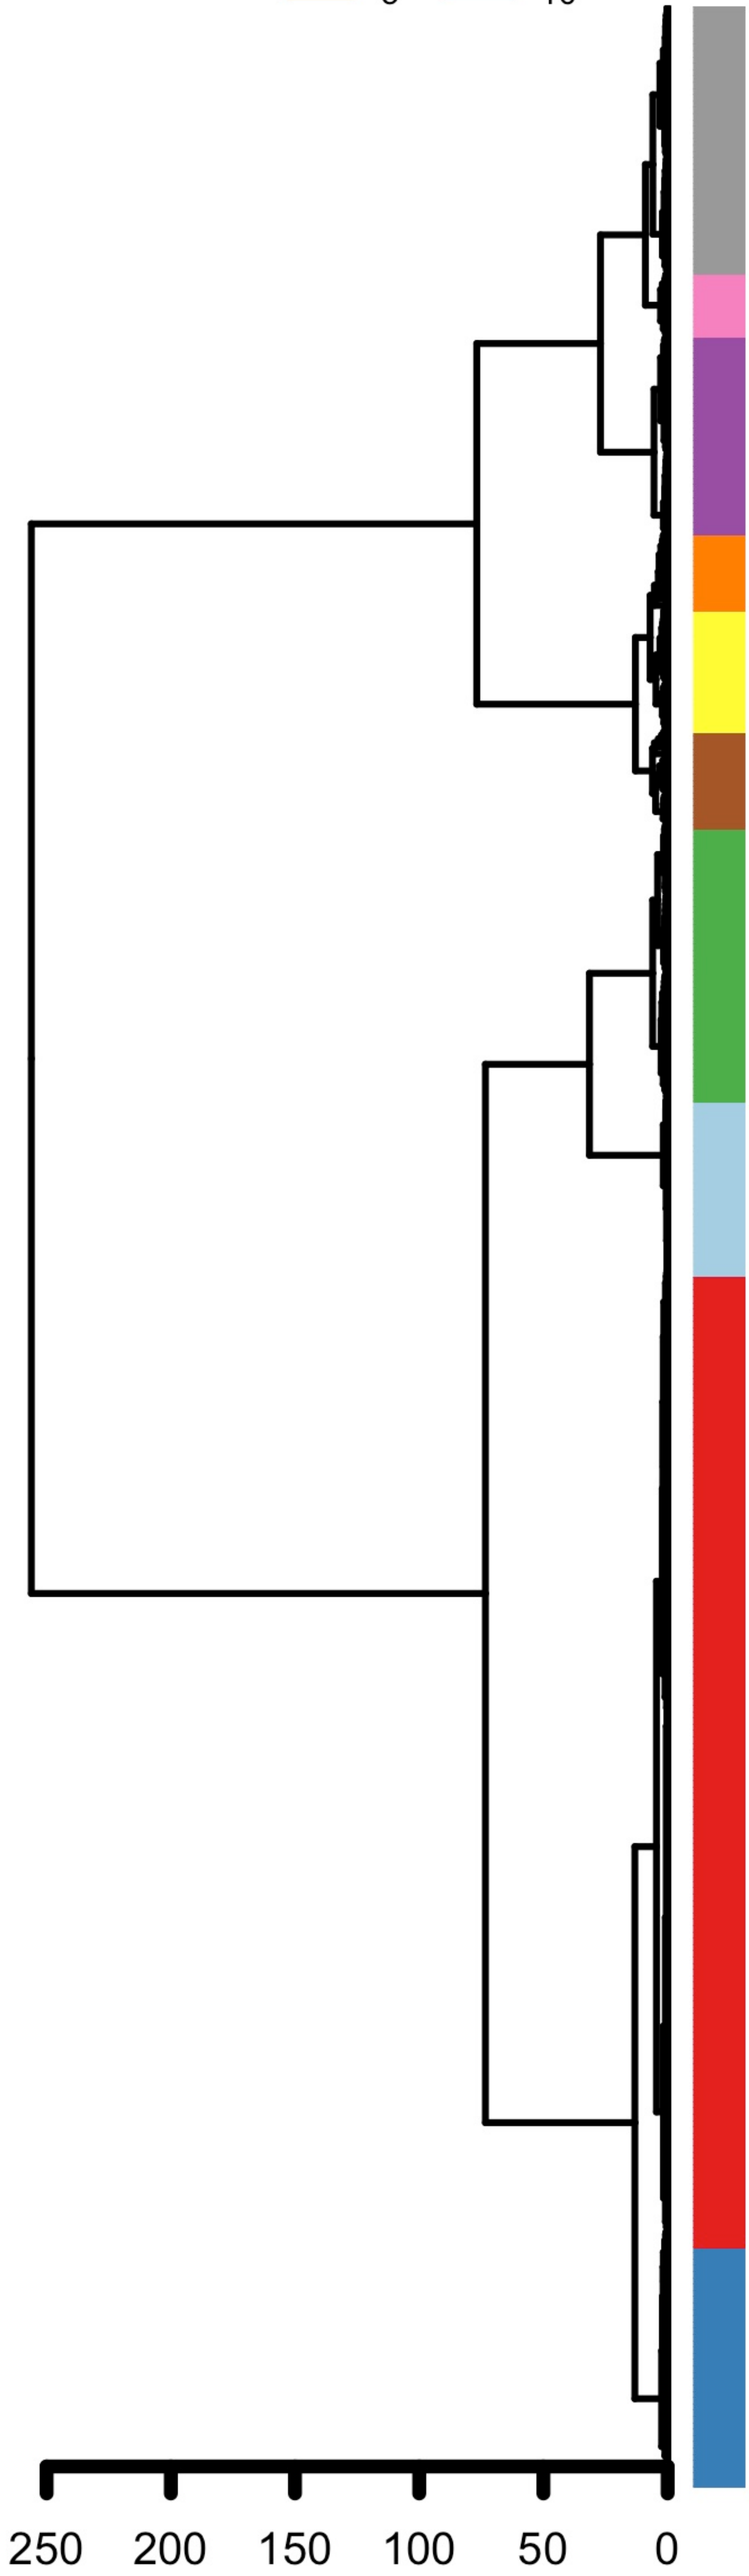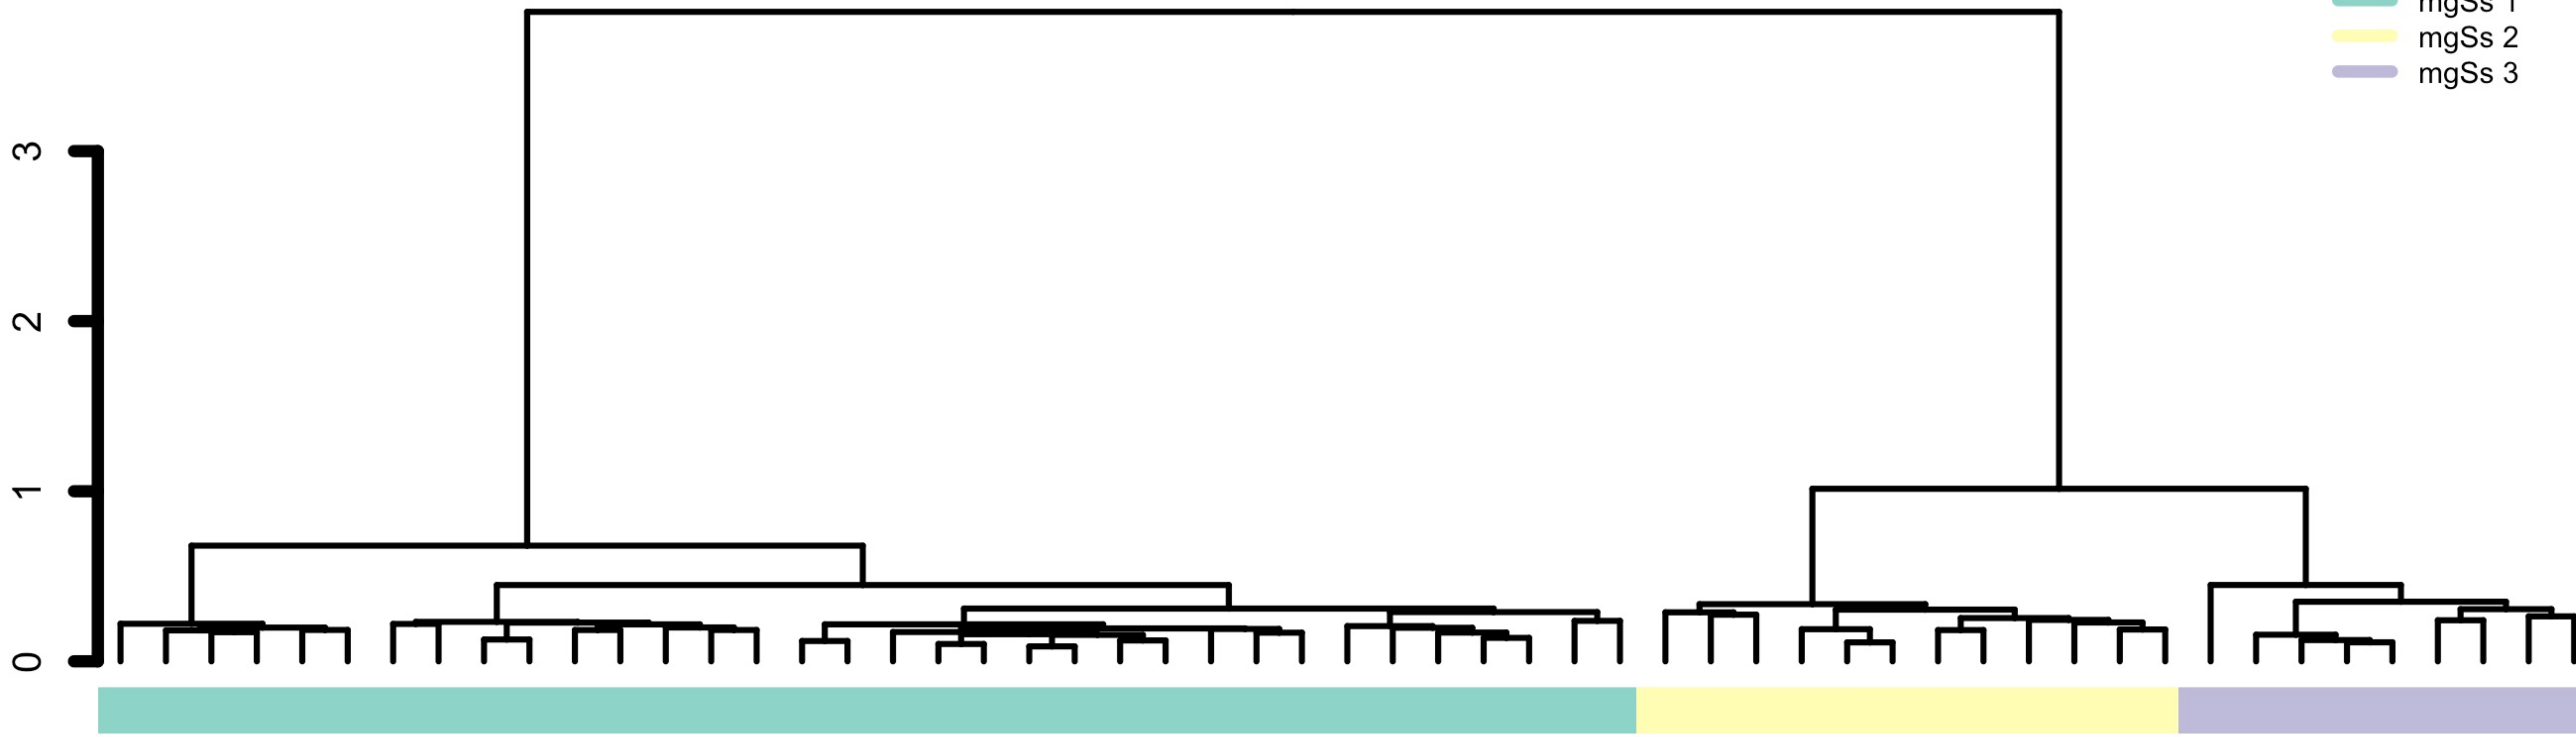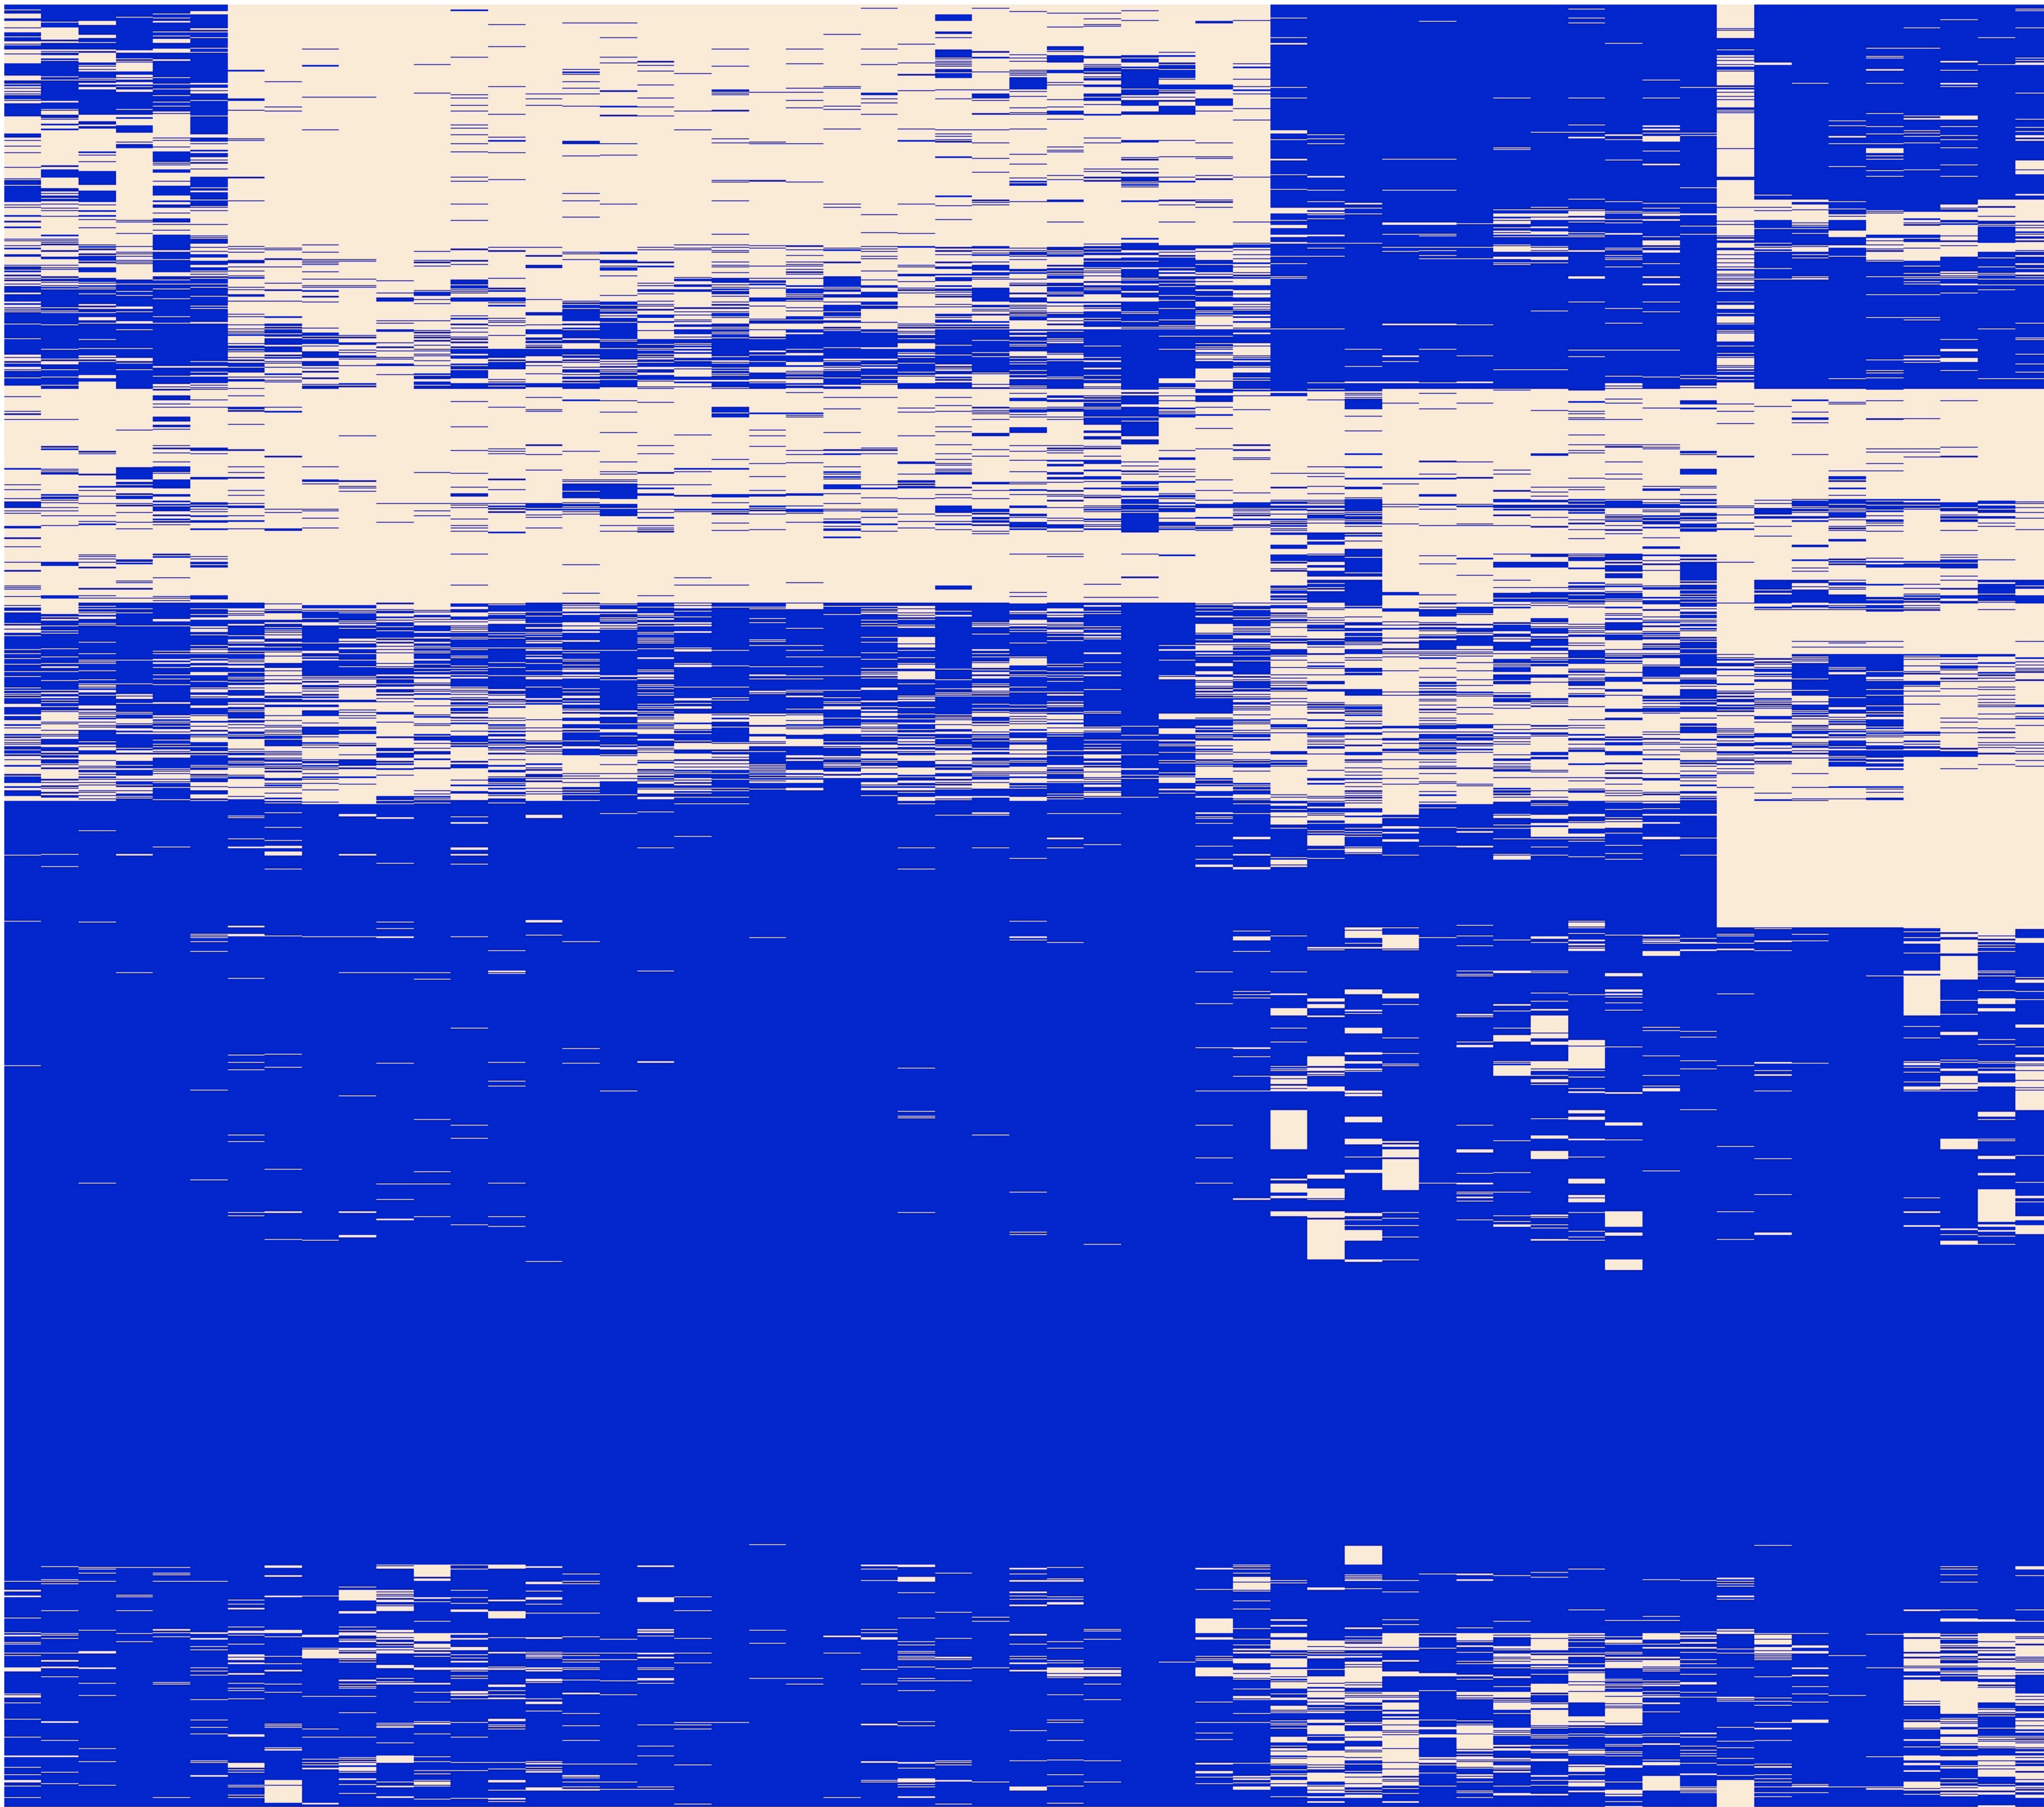

Asym Amsel-BV  
Sym Amsel-BV

Amsel-BV (-)

Peptoniphilus lacrimalis mgSs  
Number of Samples=167, Number of Genes=1676

mgSs 1  
mgSs 2  
mgSs 3  
mgSs 4

Gene Clusters

1 6  
2 7  
3 8  
4 9  
5 10

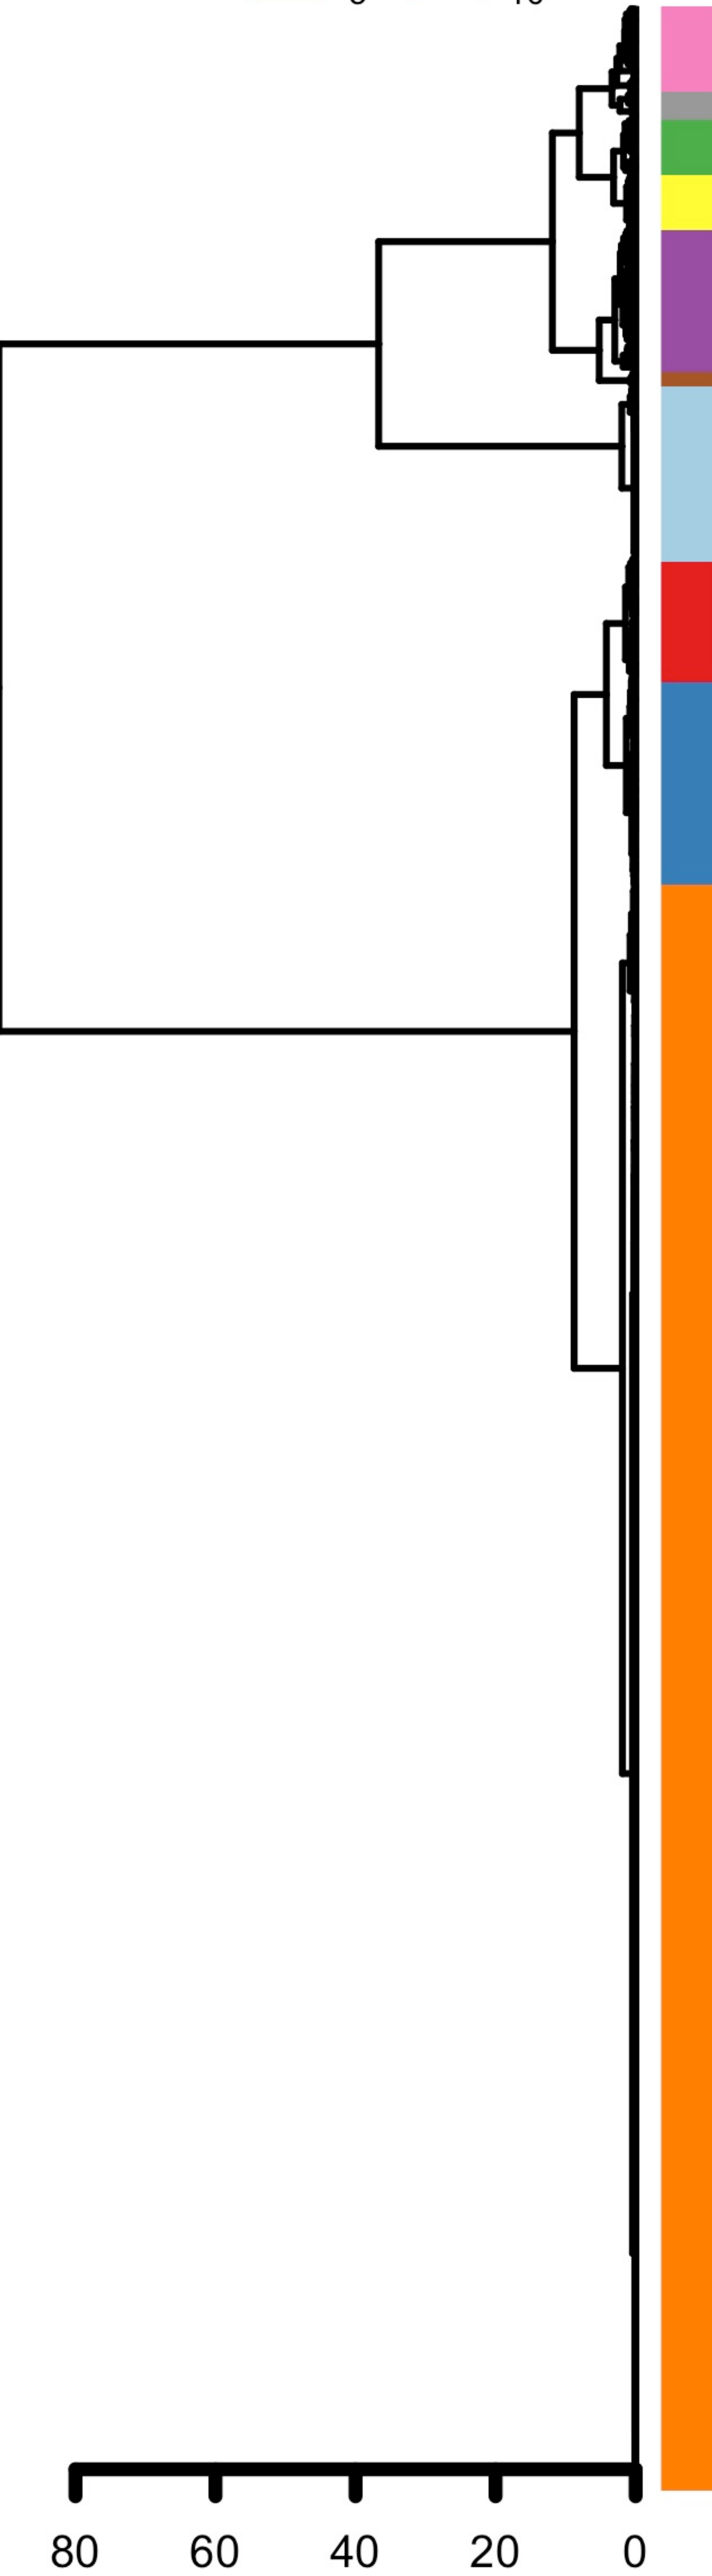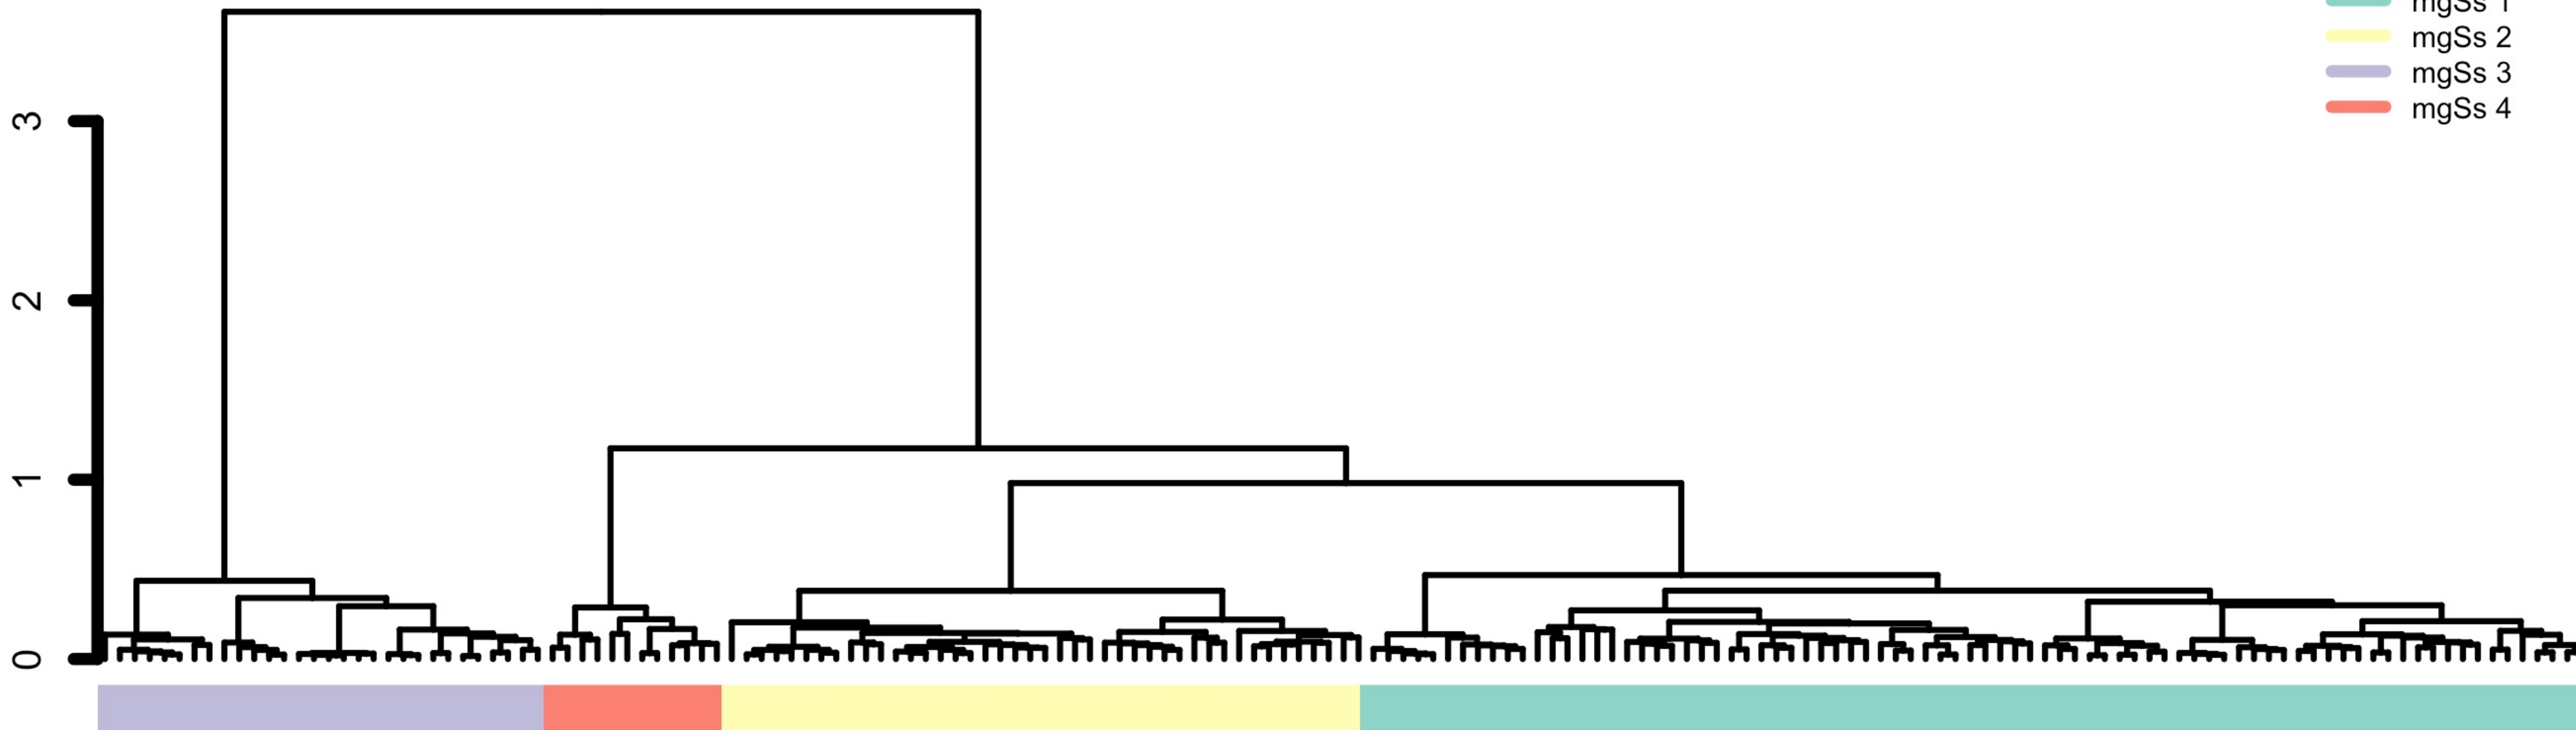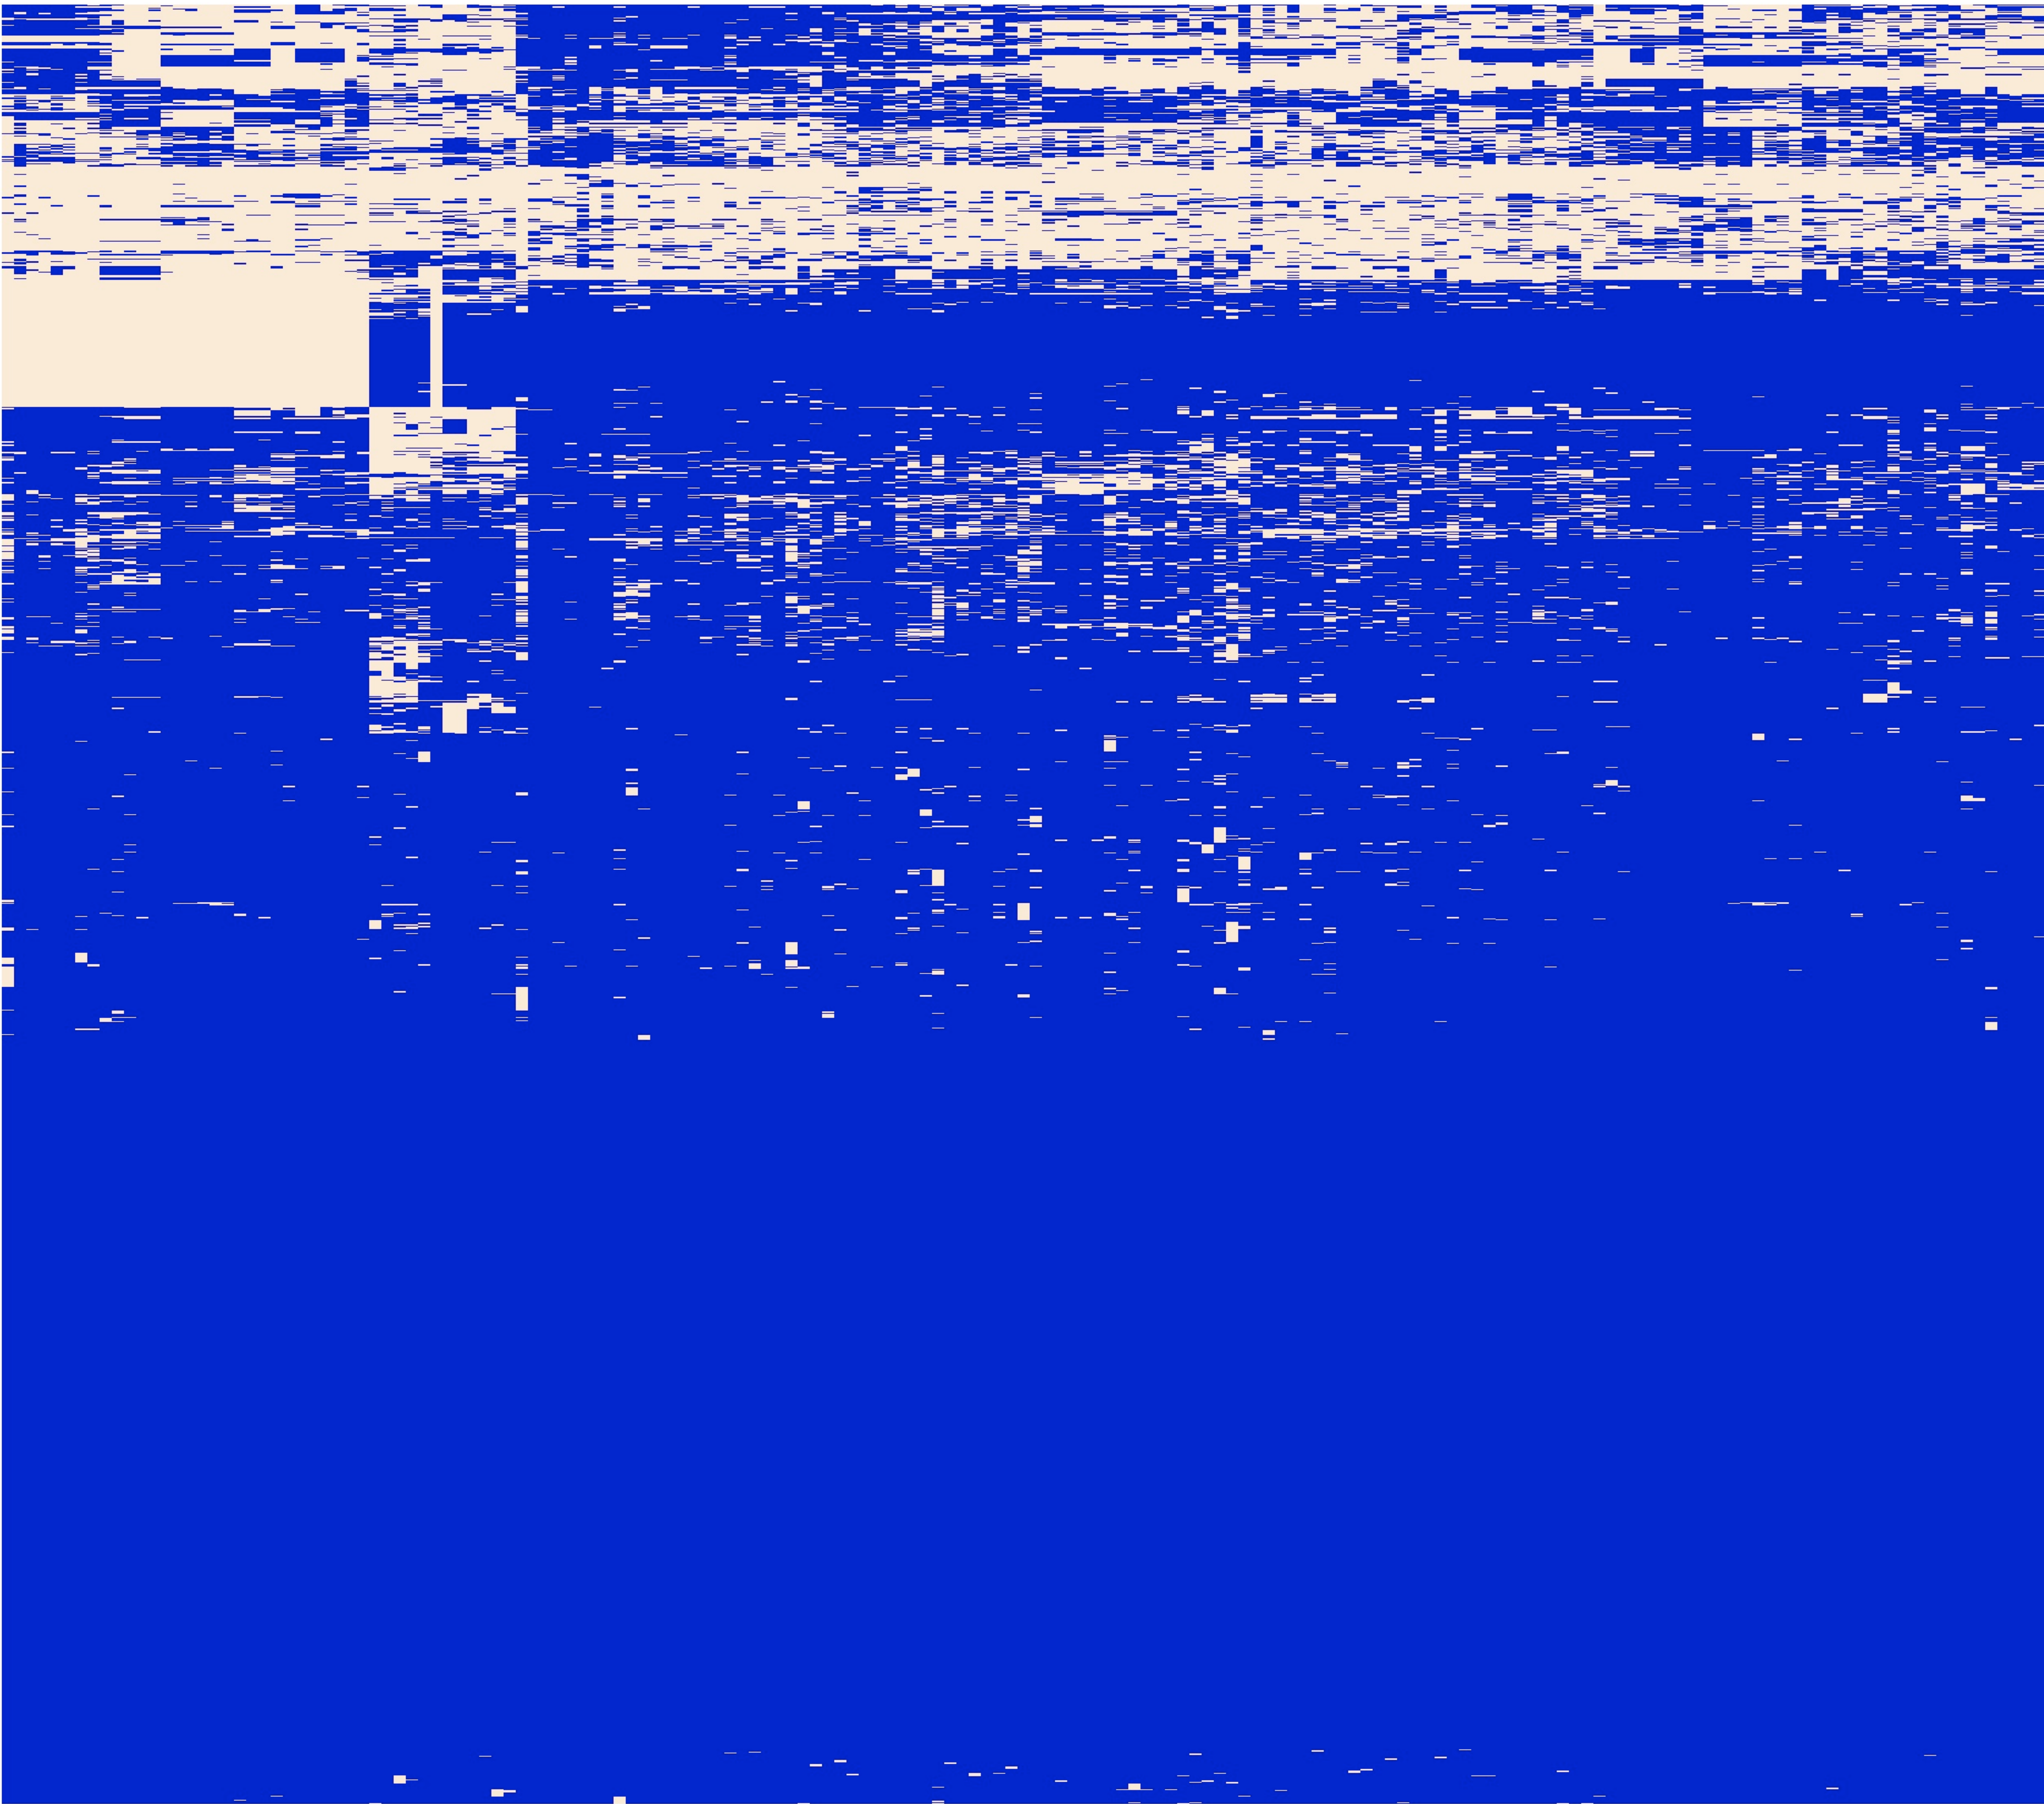

Asym Amsel-BV  
Sym Amsel-BV

Amsel-BV (-)

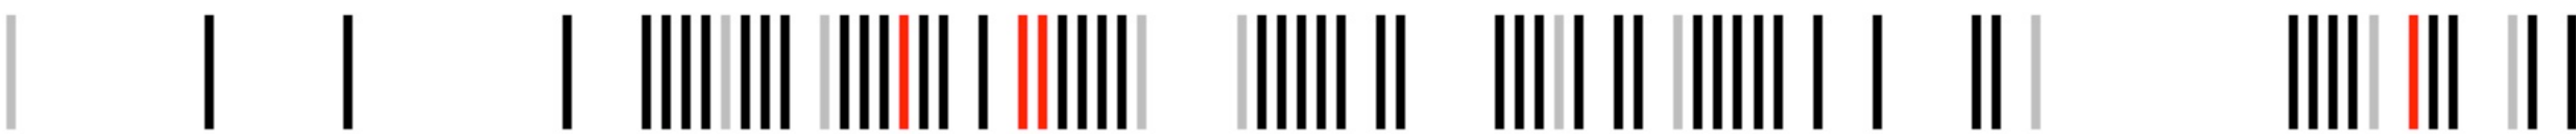

Peptostreptococcus anaerobius mgSs  
Number of Samples=131, Number of Genes=2018

- mgSs 1
- mgSs 2
- mgSs 3
- mgSs 4
- mgSs 5
- mgSs 6
- mgSs 7

- Gene Clusters
- 1
  - 2
  - 3
  - 4
  - 5
  - 6
  - 7
  - 8
  - 9
  - 10

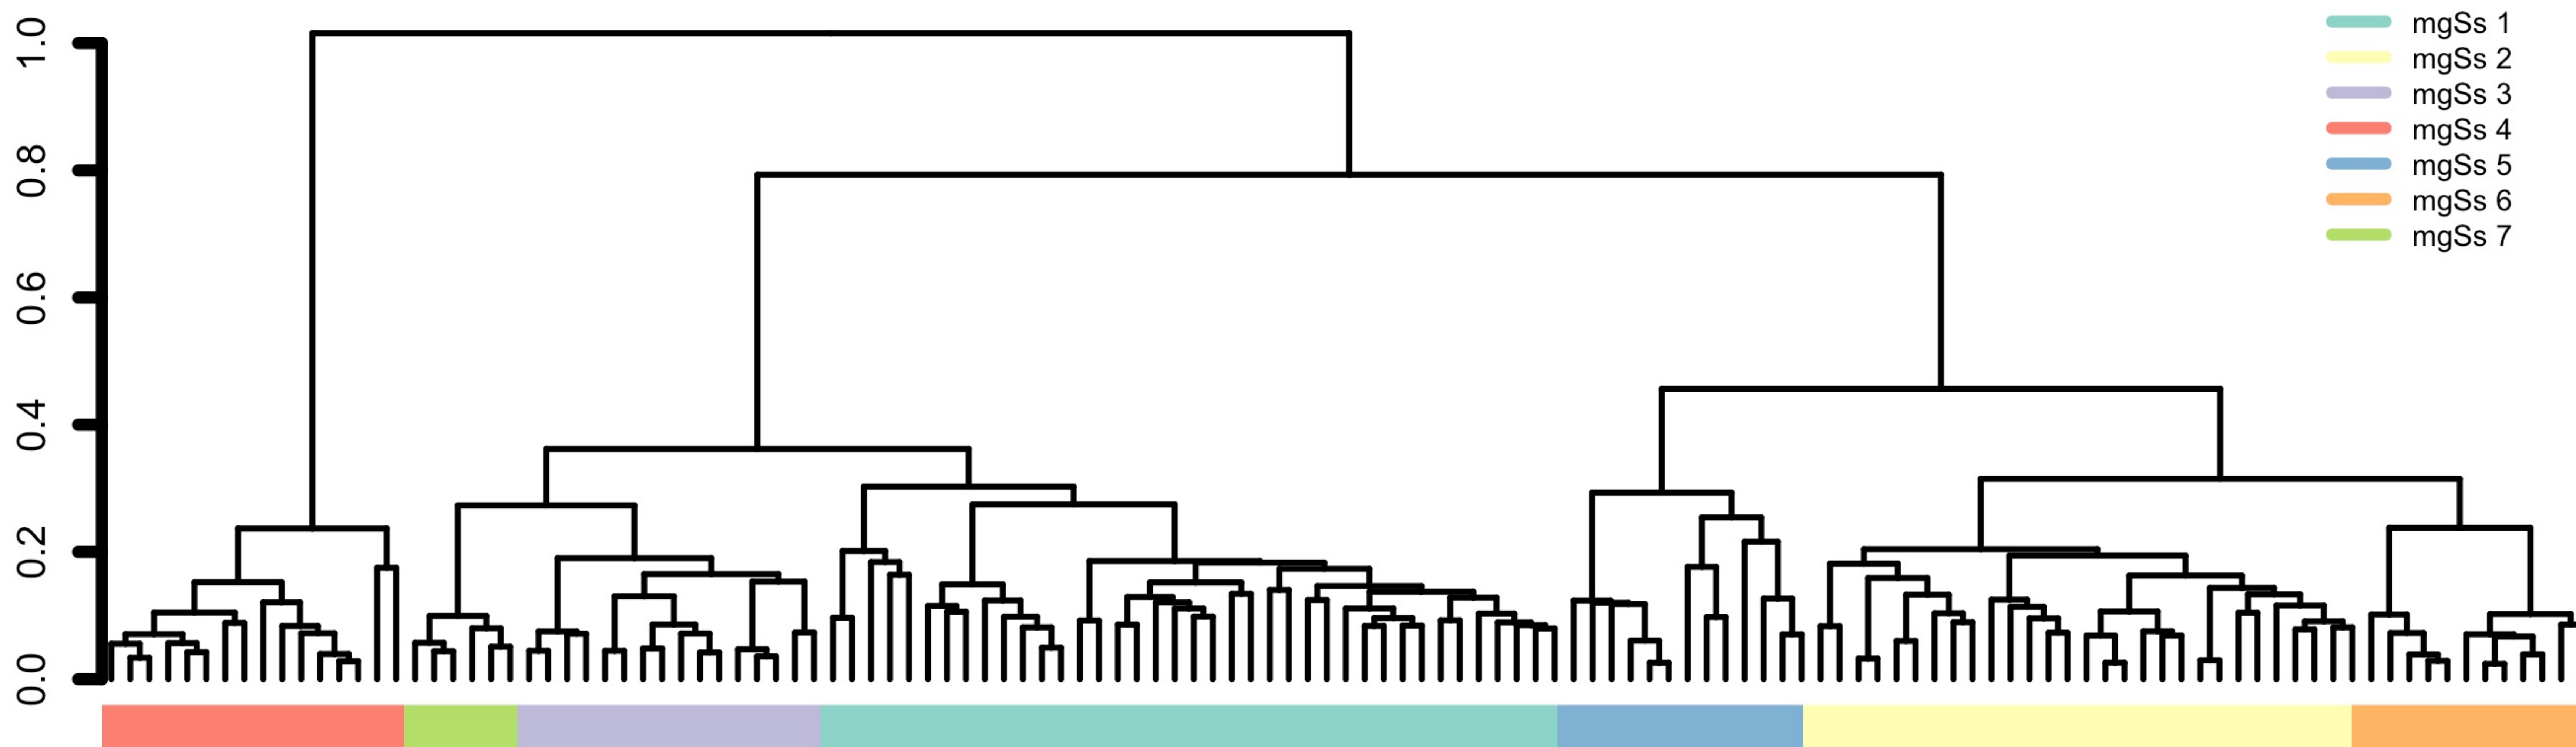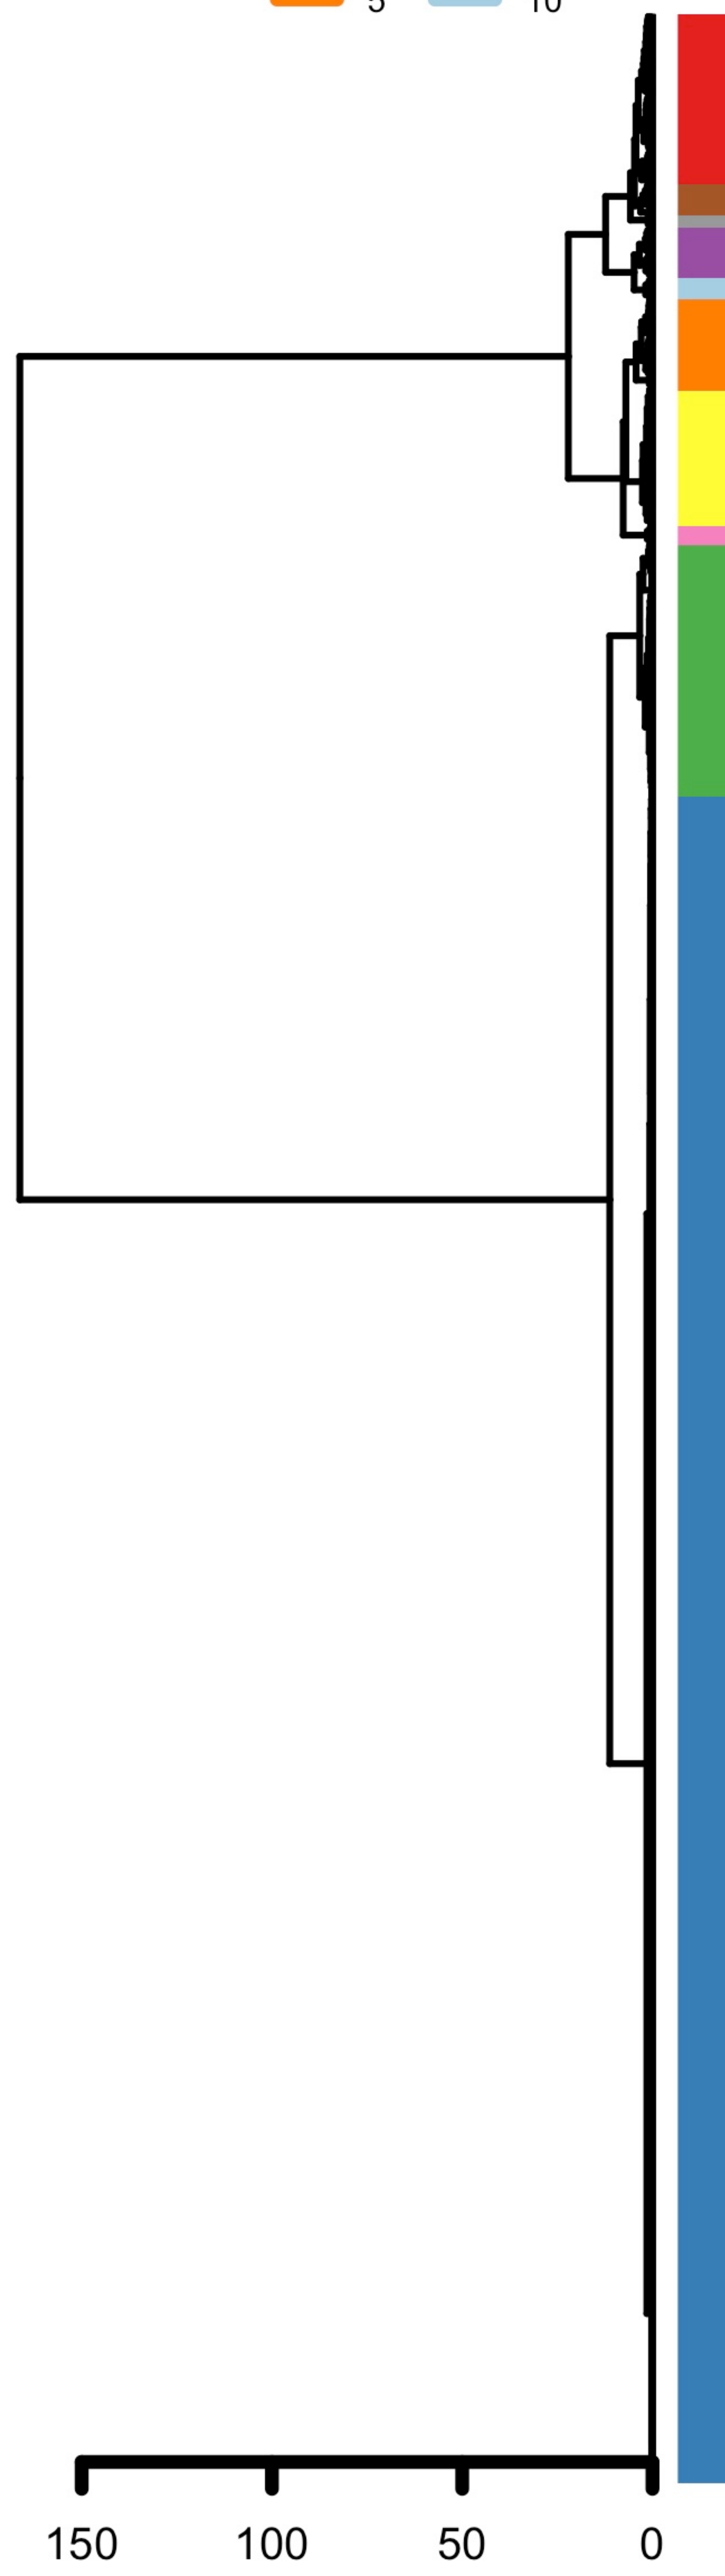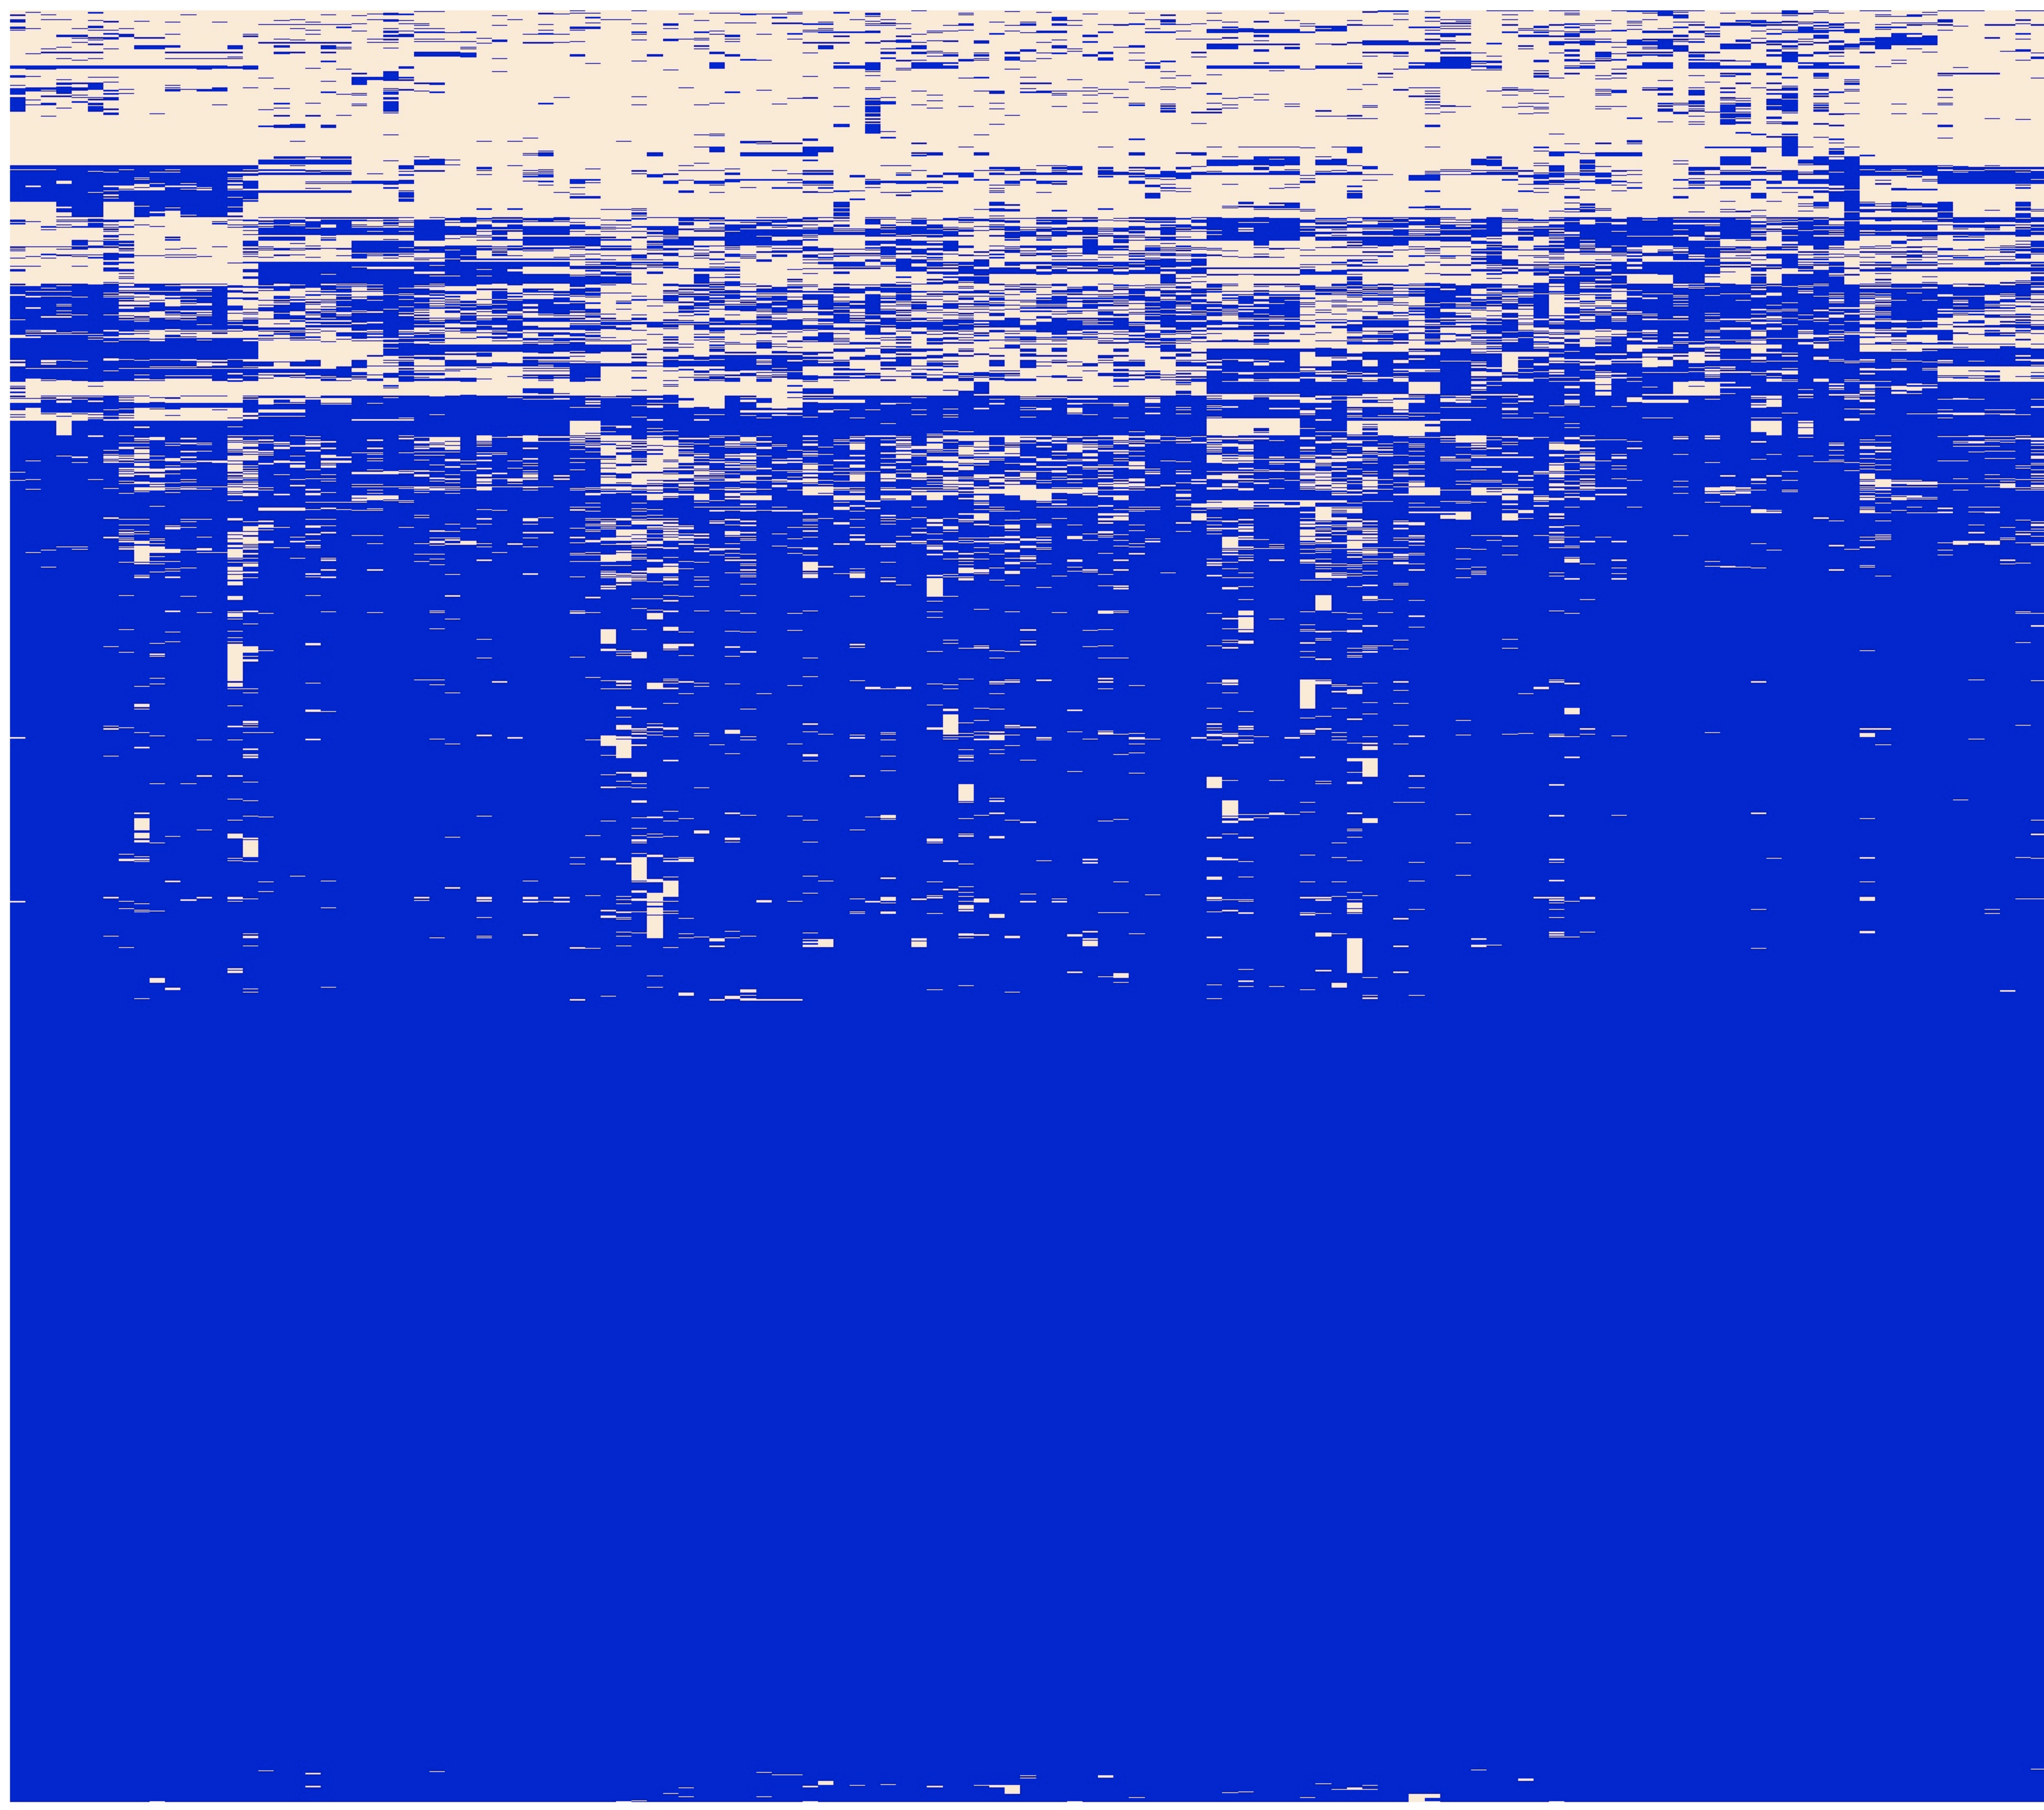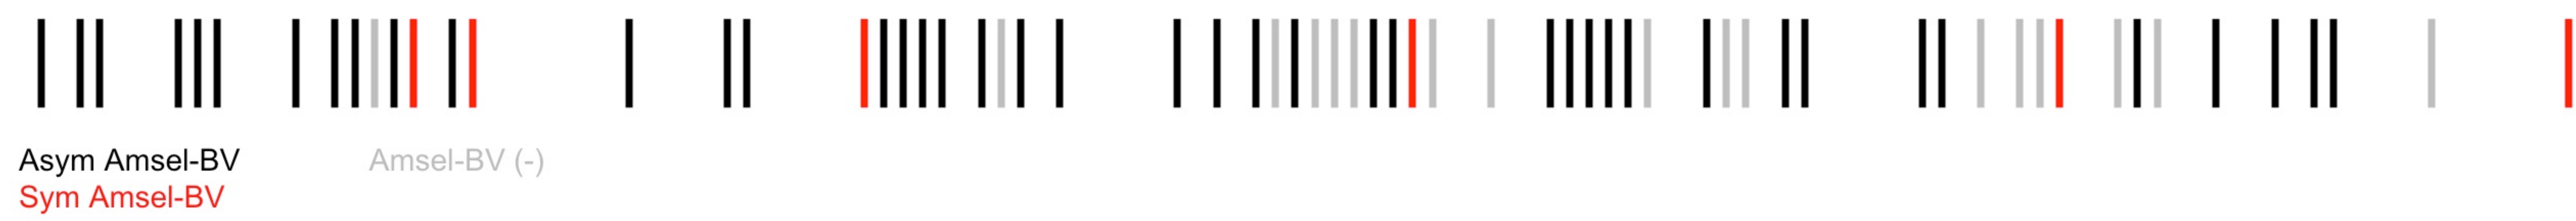

Porphyromonas uenonis mgSs  
Number of Samples=119, Number of Genes=2834

mgSs 1  
mgSs 2  
mgSs 3  
mgSs 4

Gene Clusters

1 6  
2 7  
3 8  
4 9  
5 10

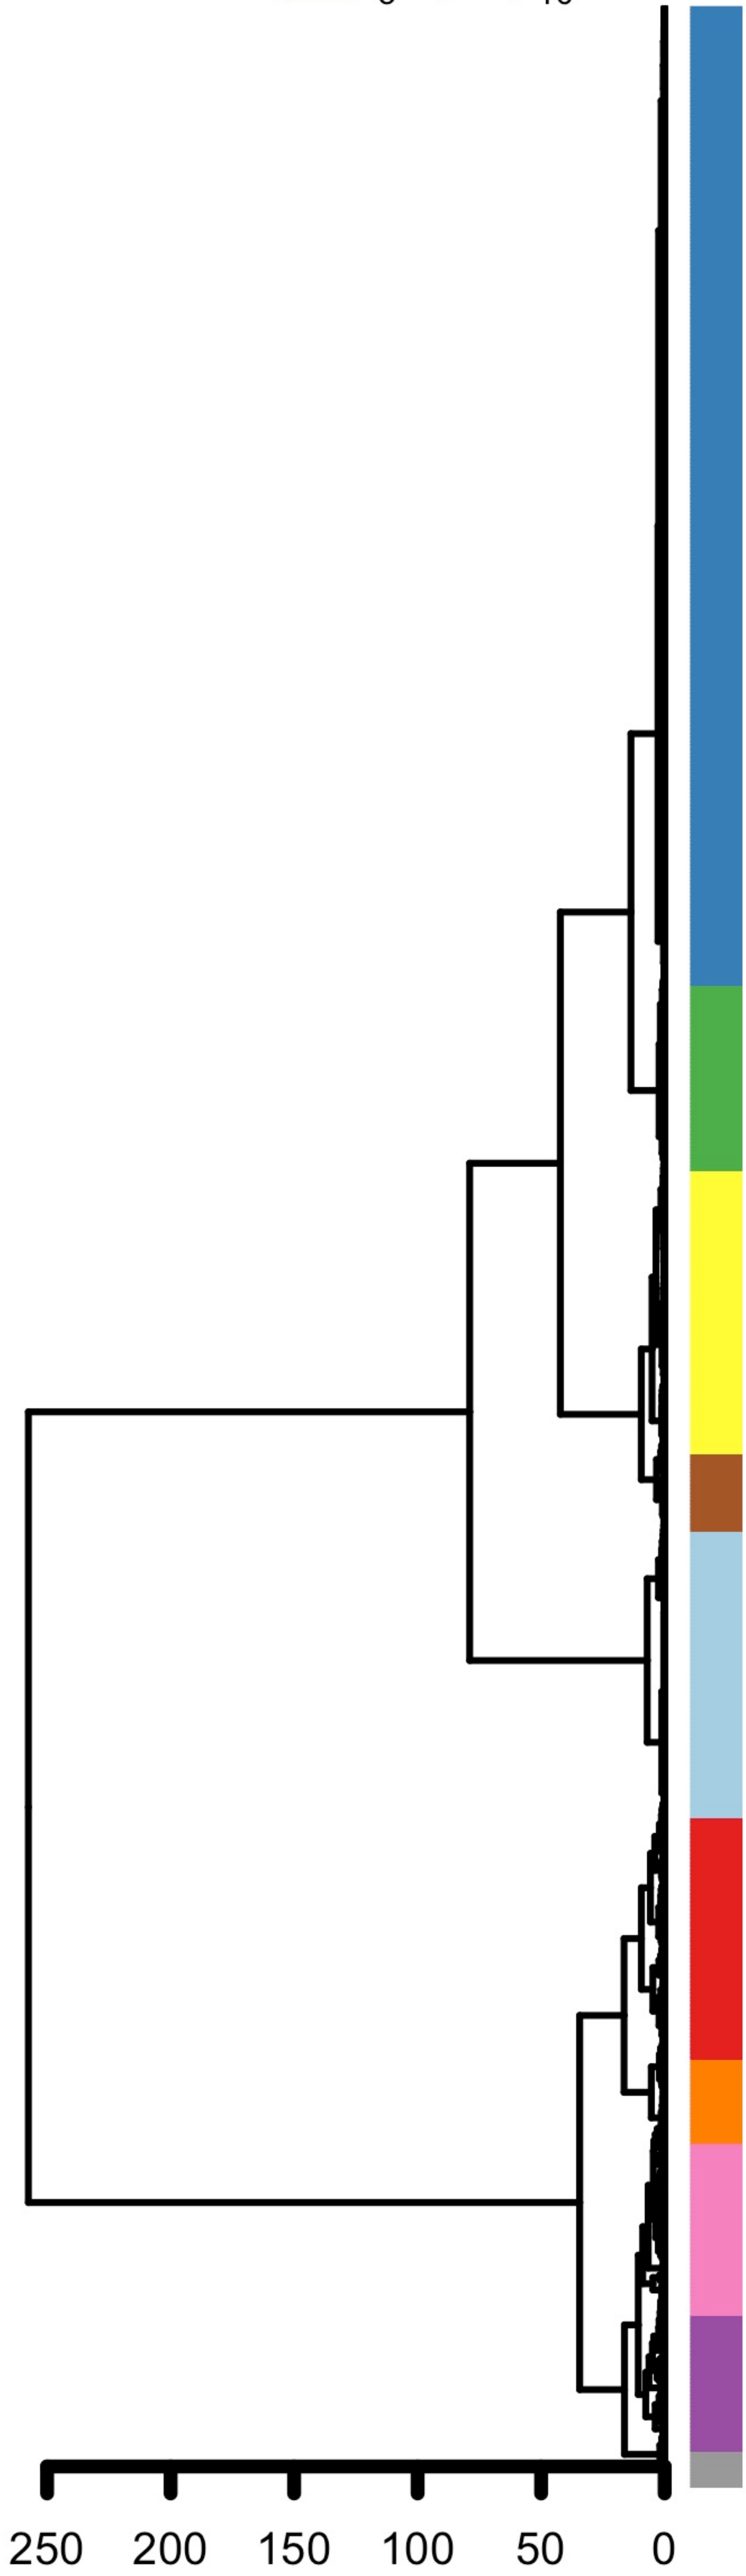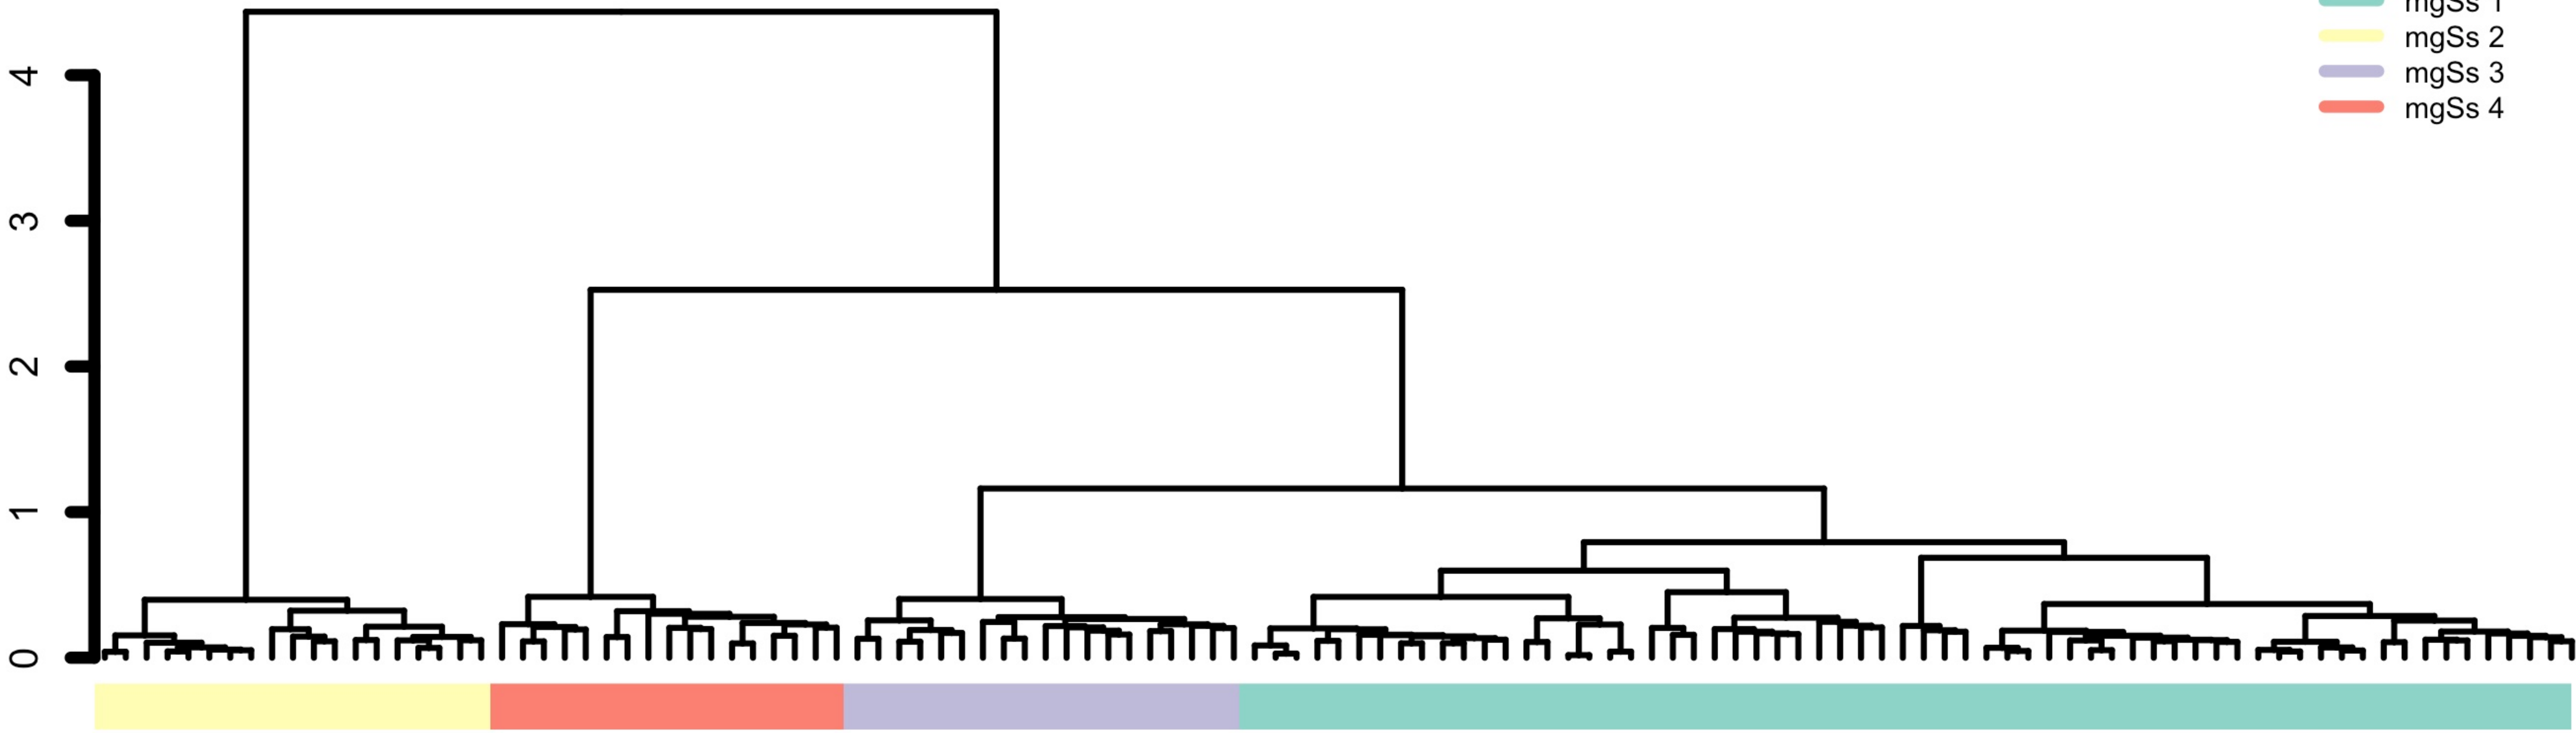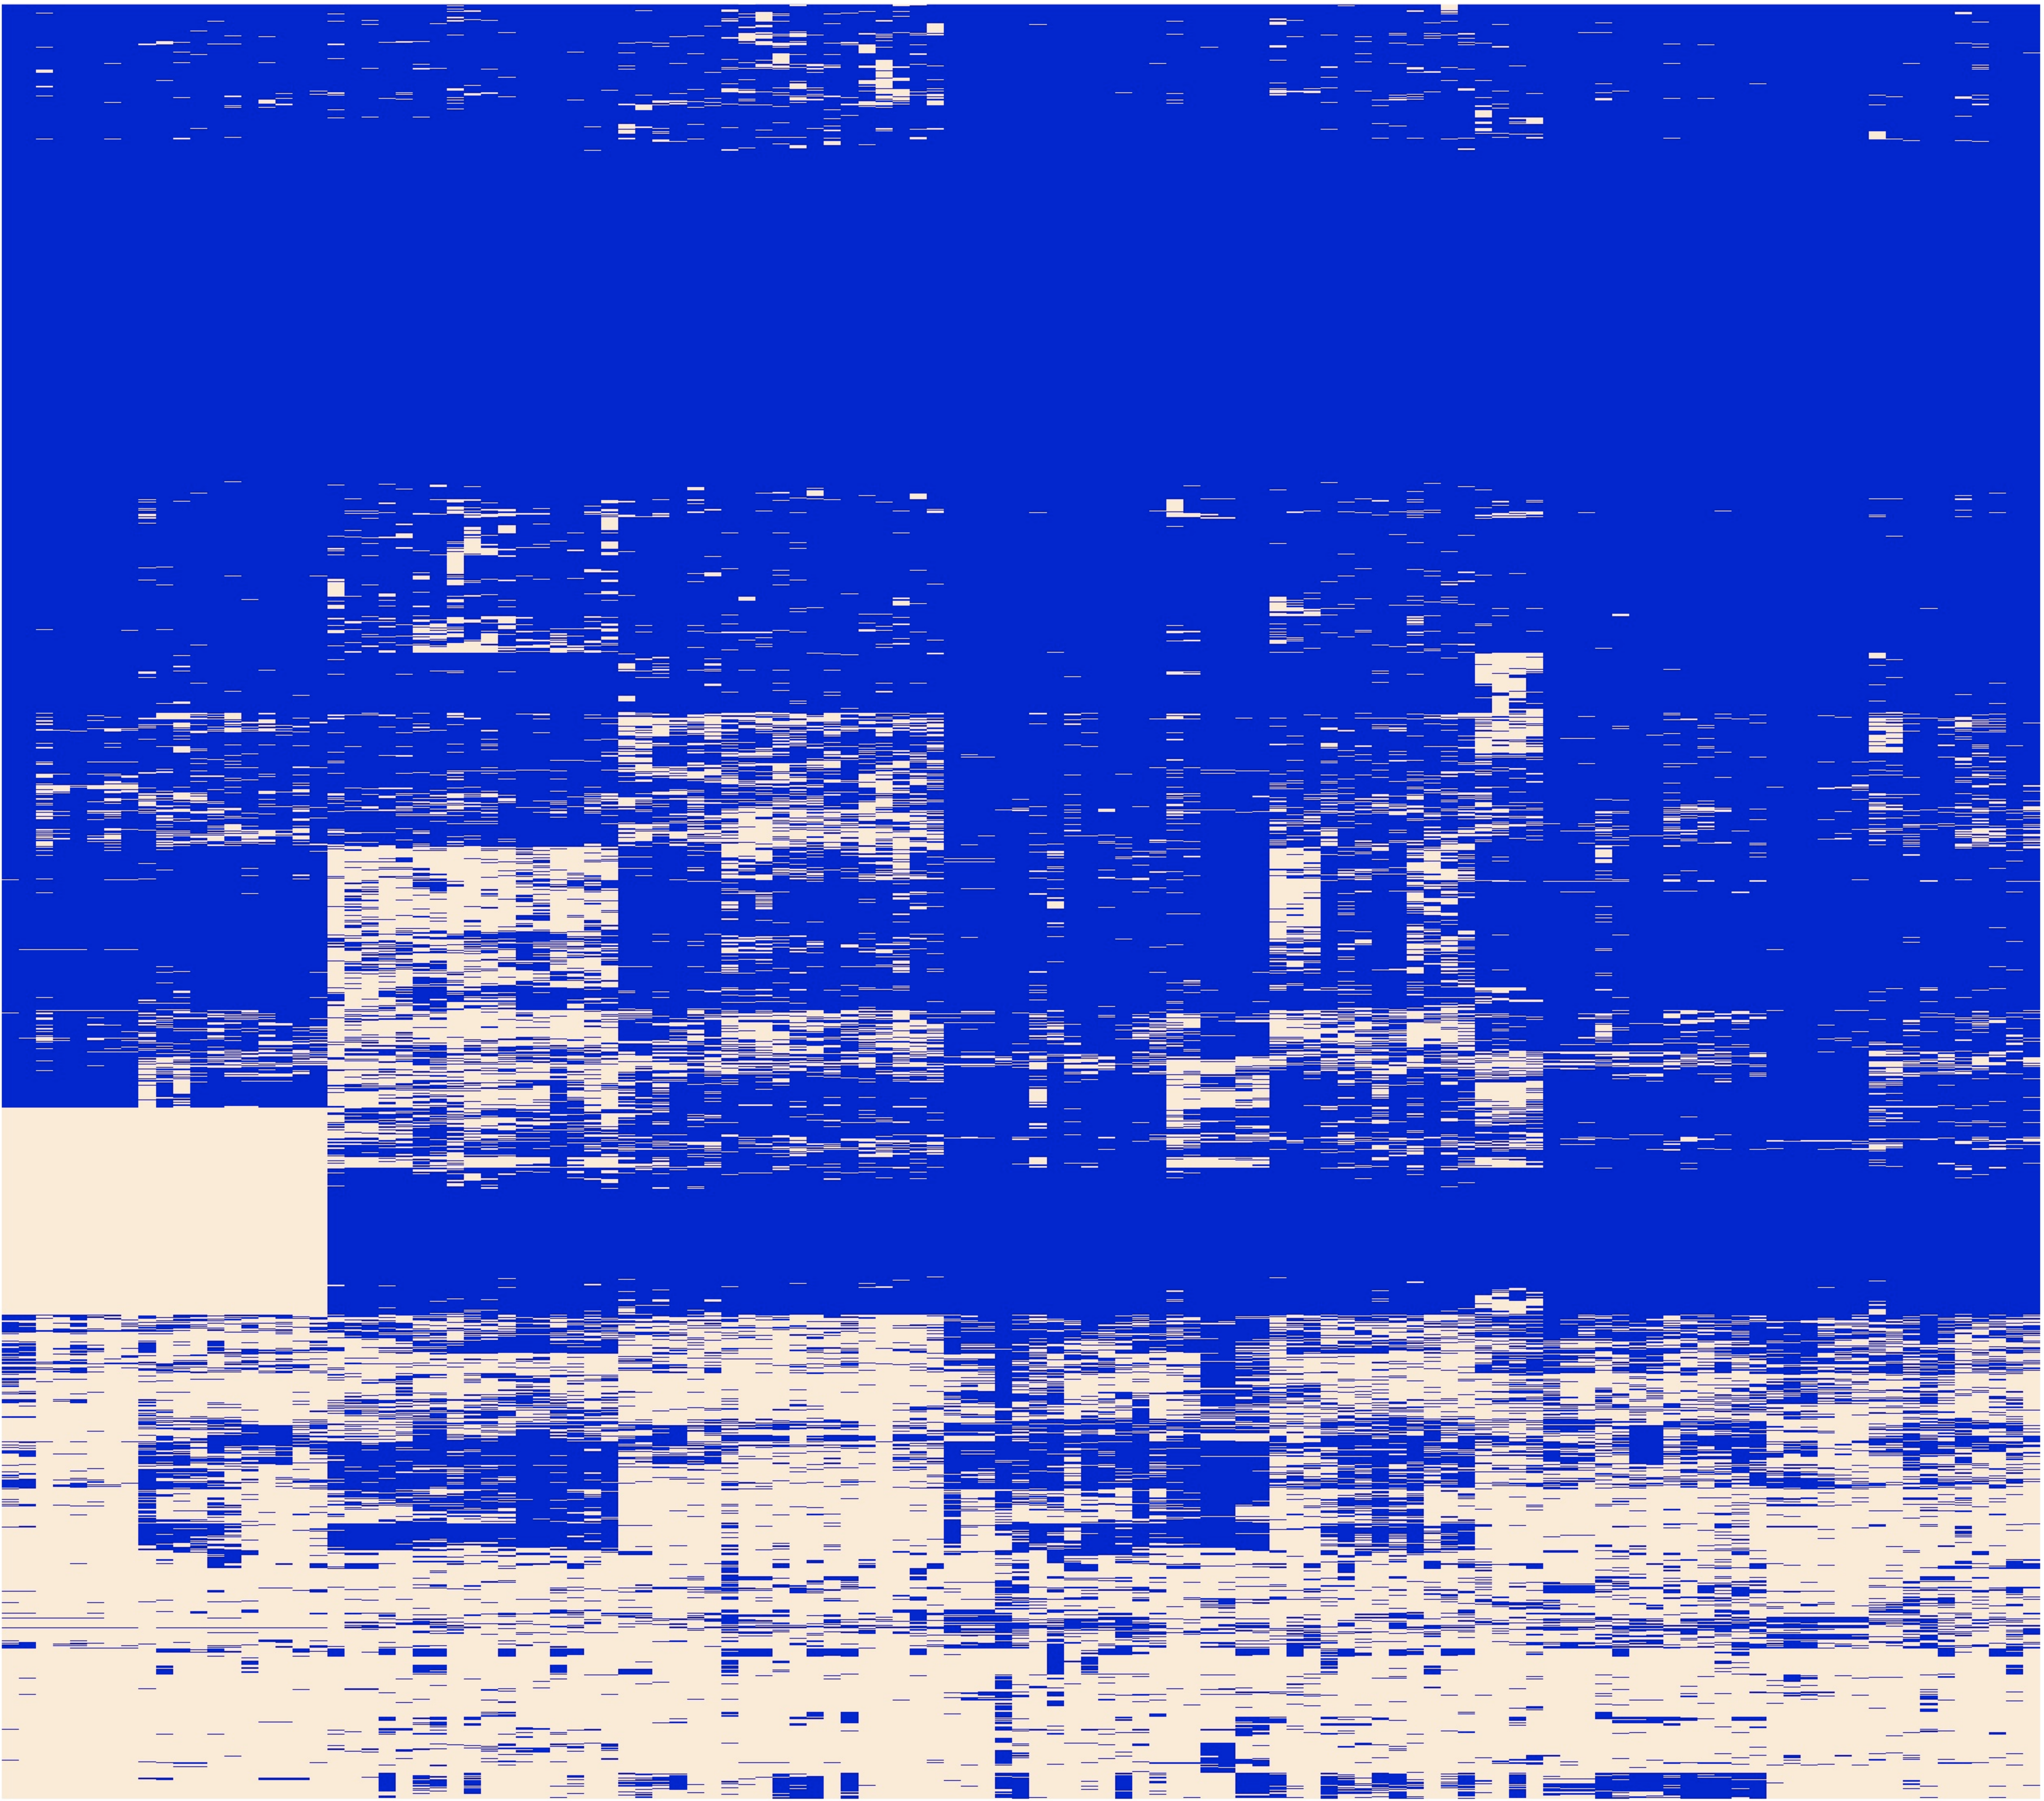

Asym Amsel-BV  
Sym Amsel-BV

Amsel-BV (-)

Prevotella amnii mgSs  
Number of Samples=505, Number of Genes=3467

- mgSs 1
- mgSs 2
- mgSs 3
- mgSs 4
- mgSs 5
- mgSs 6
- mgSs 7
- mgSs 8
- mgSs 9

- Gene Clusters
- 1
  - 2
  - 3
  - 4
  - 5
  - 6
  - 7
  - 8
  - 9
  - 10

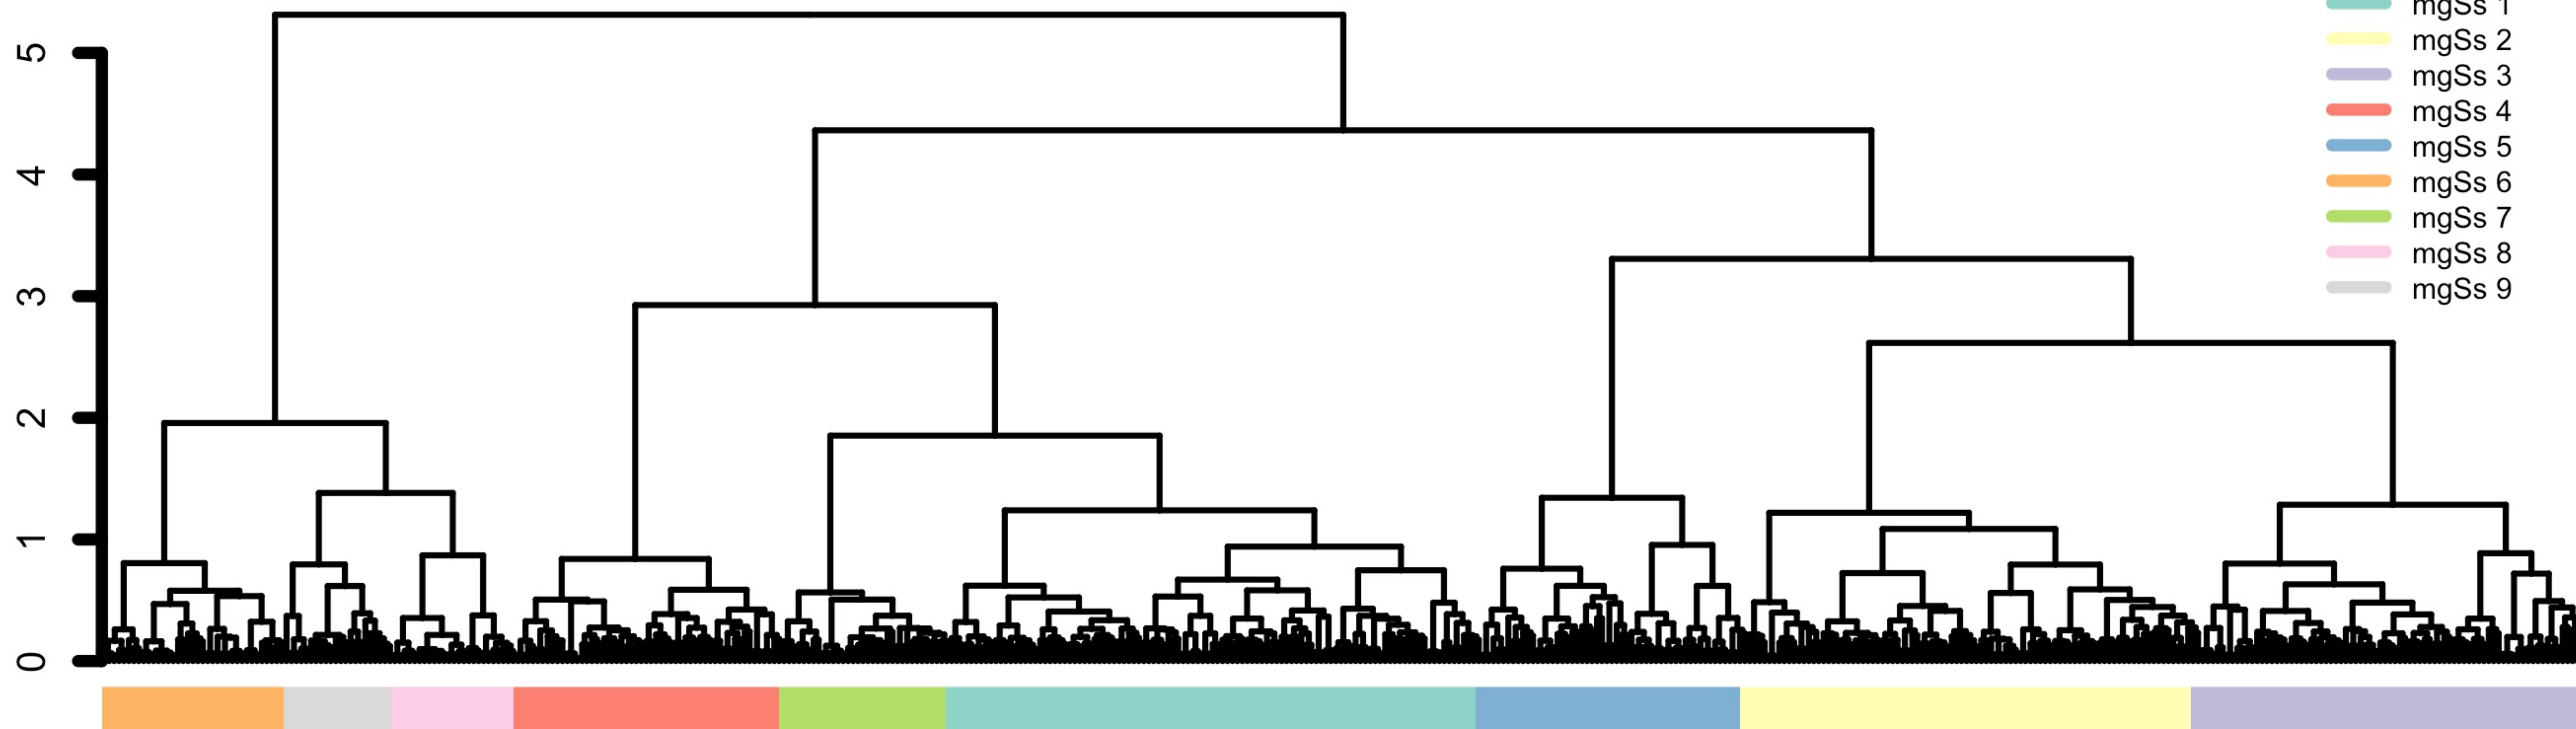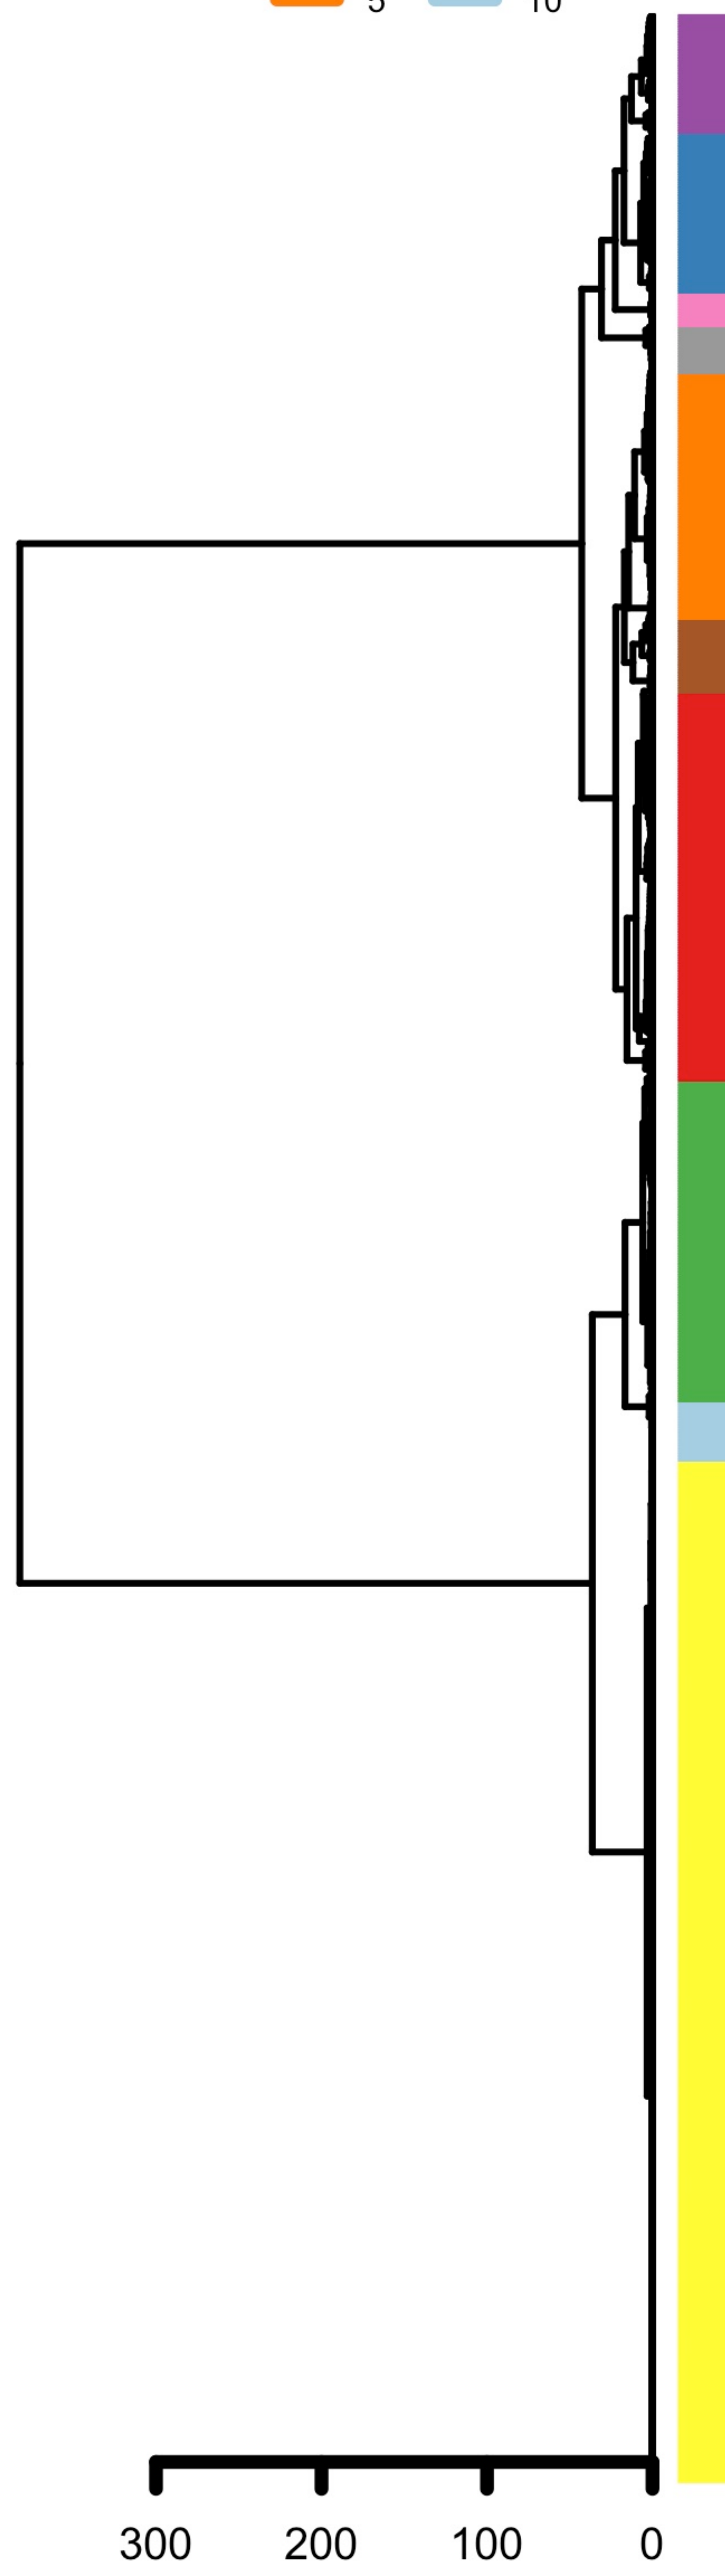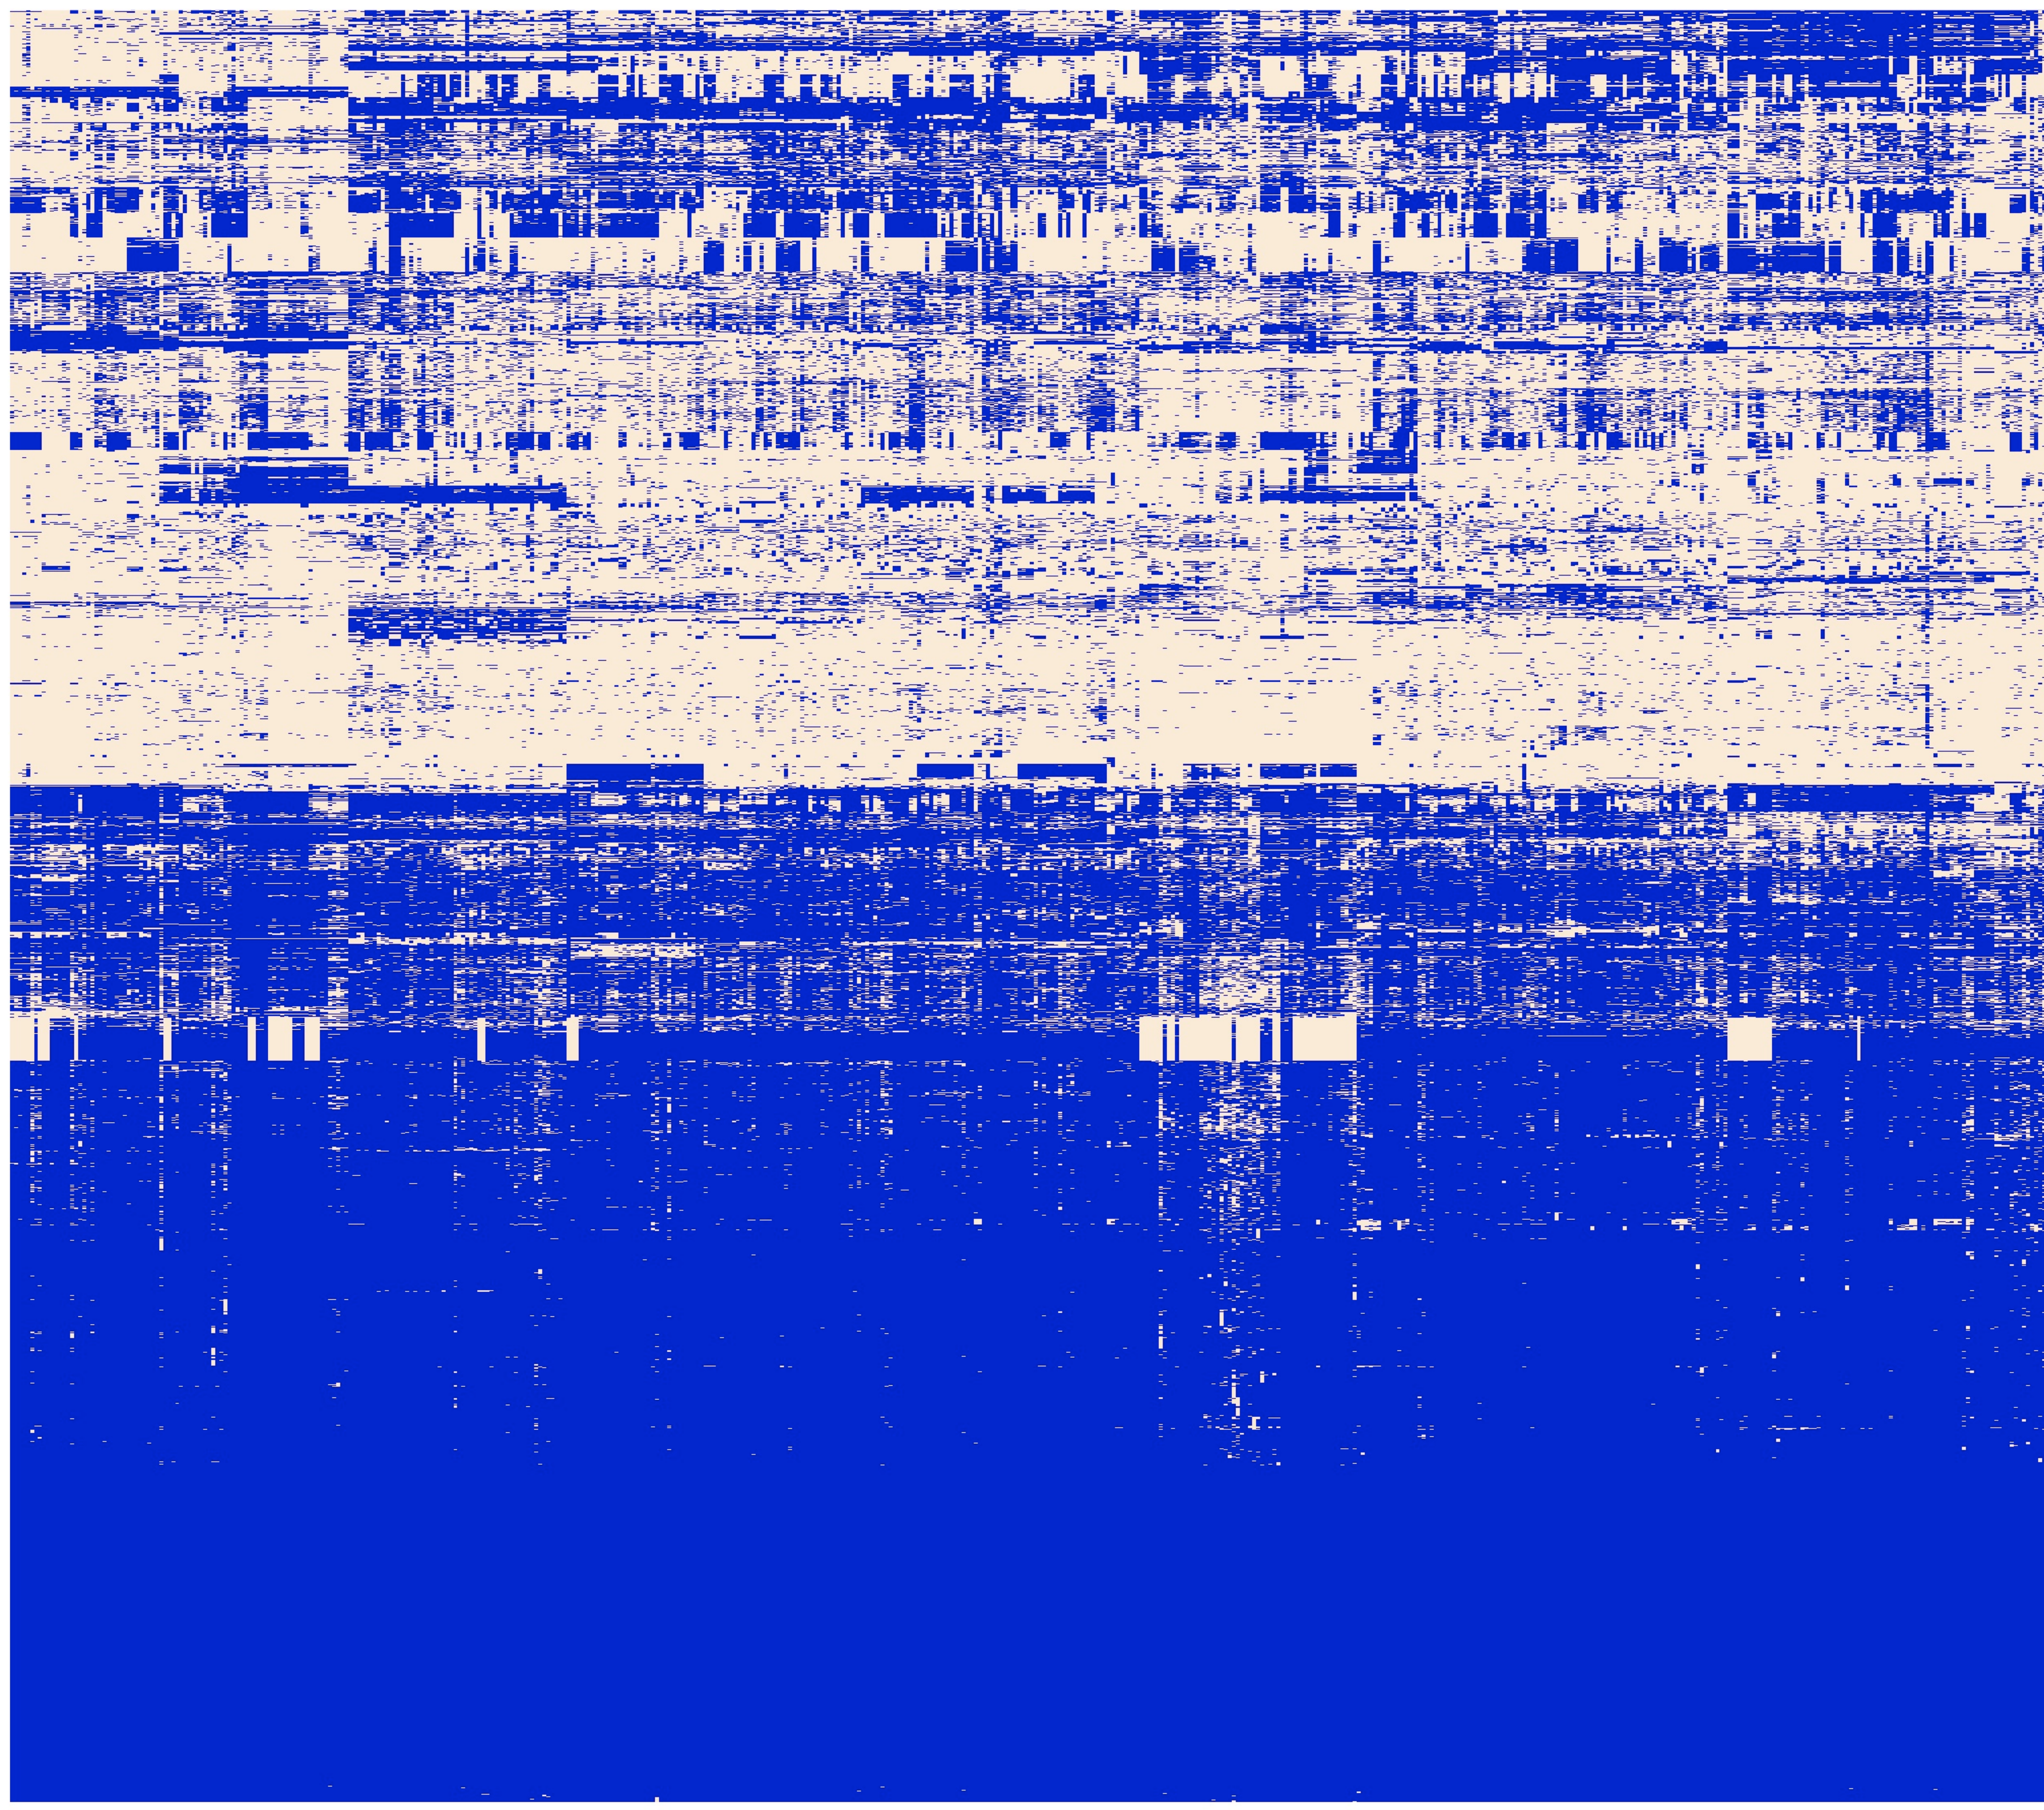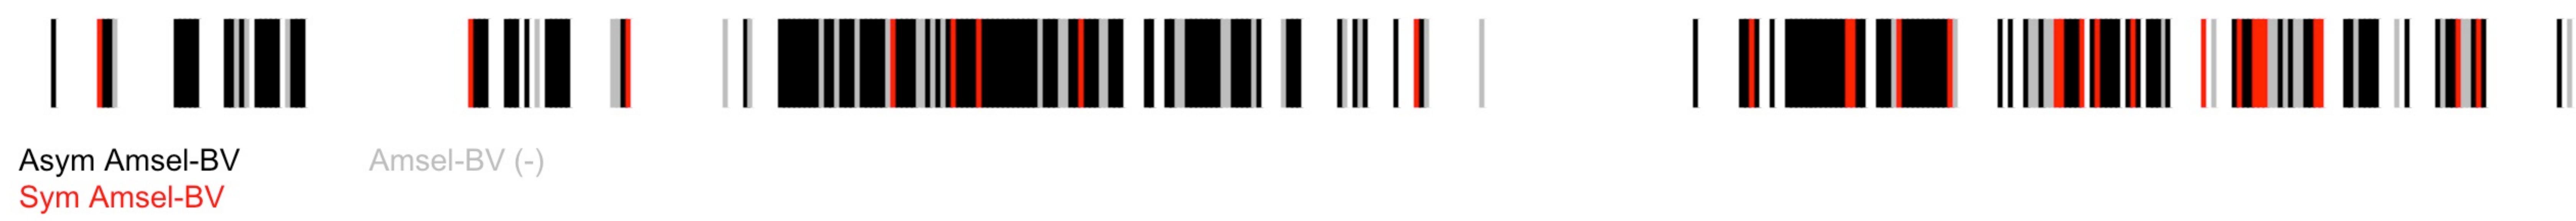

Prevotella bivia mgSs  
Number of Samples=255, Number of Genes=2820

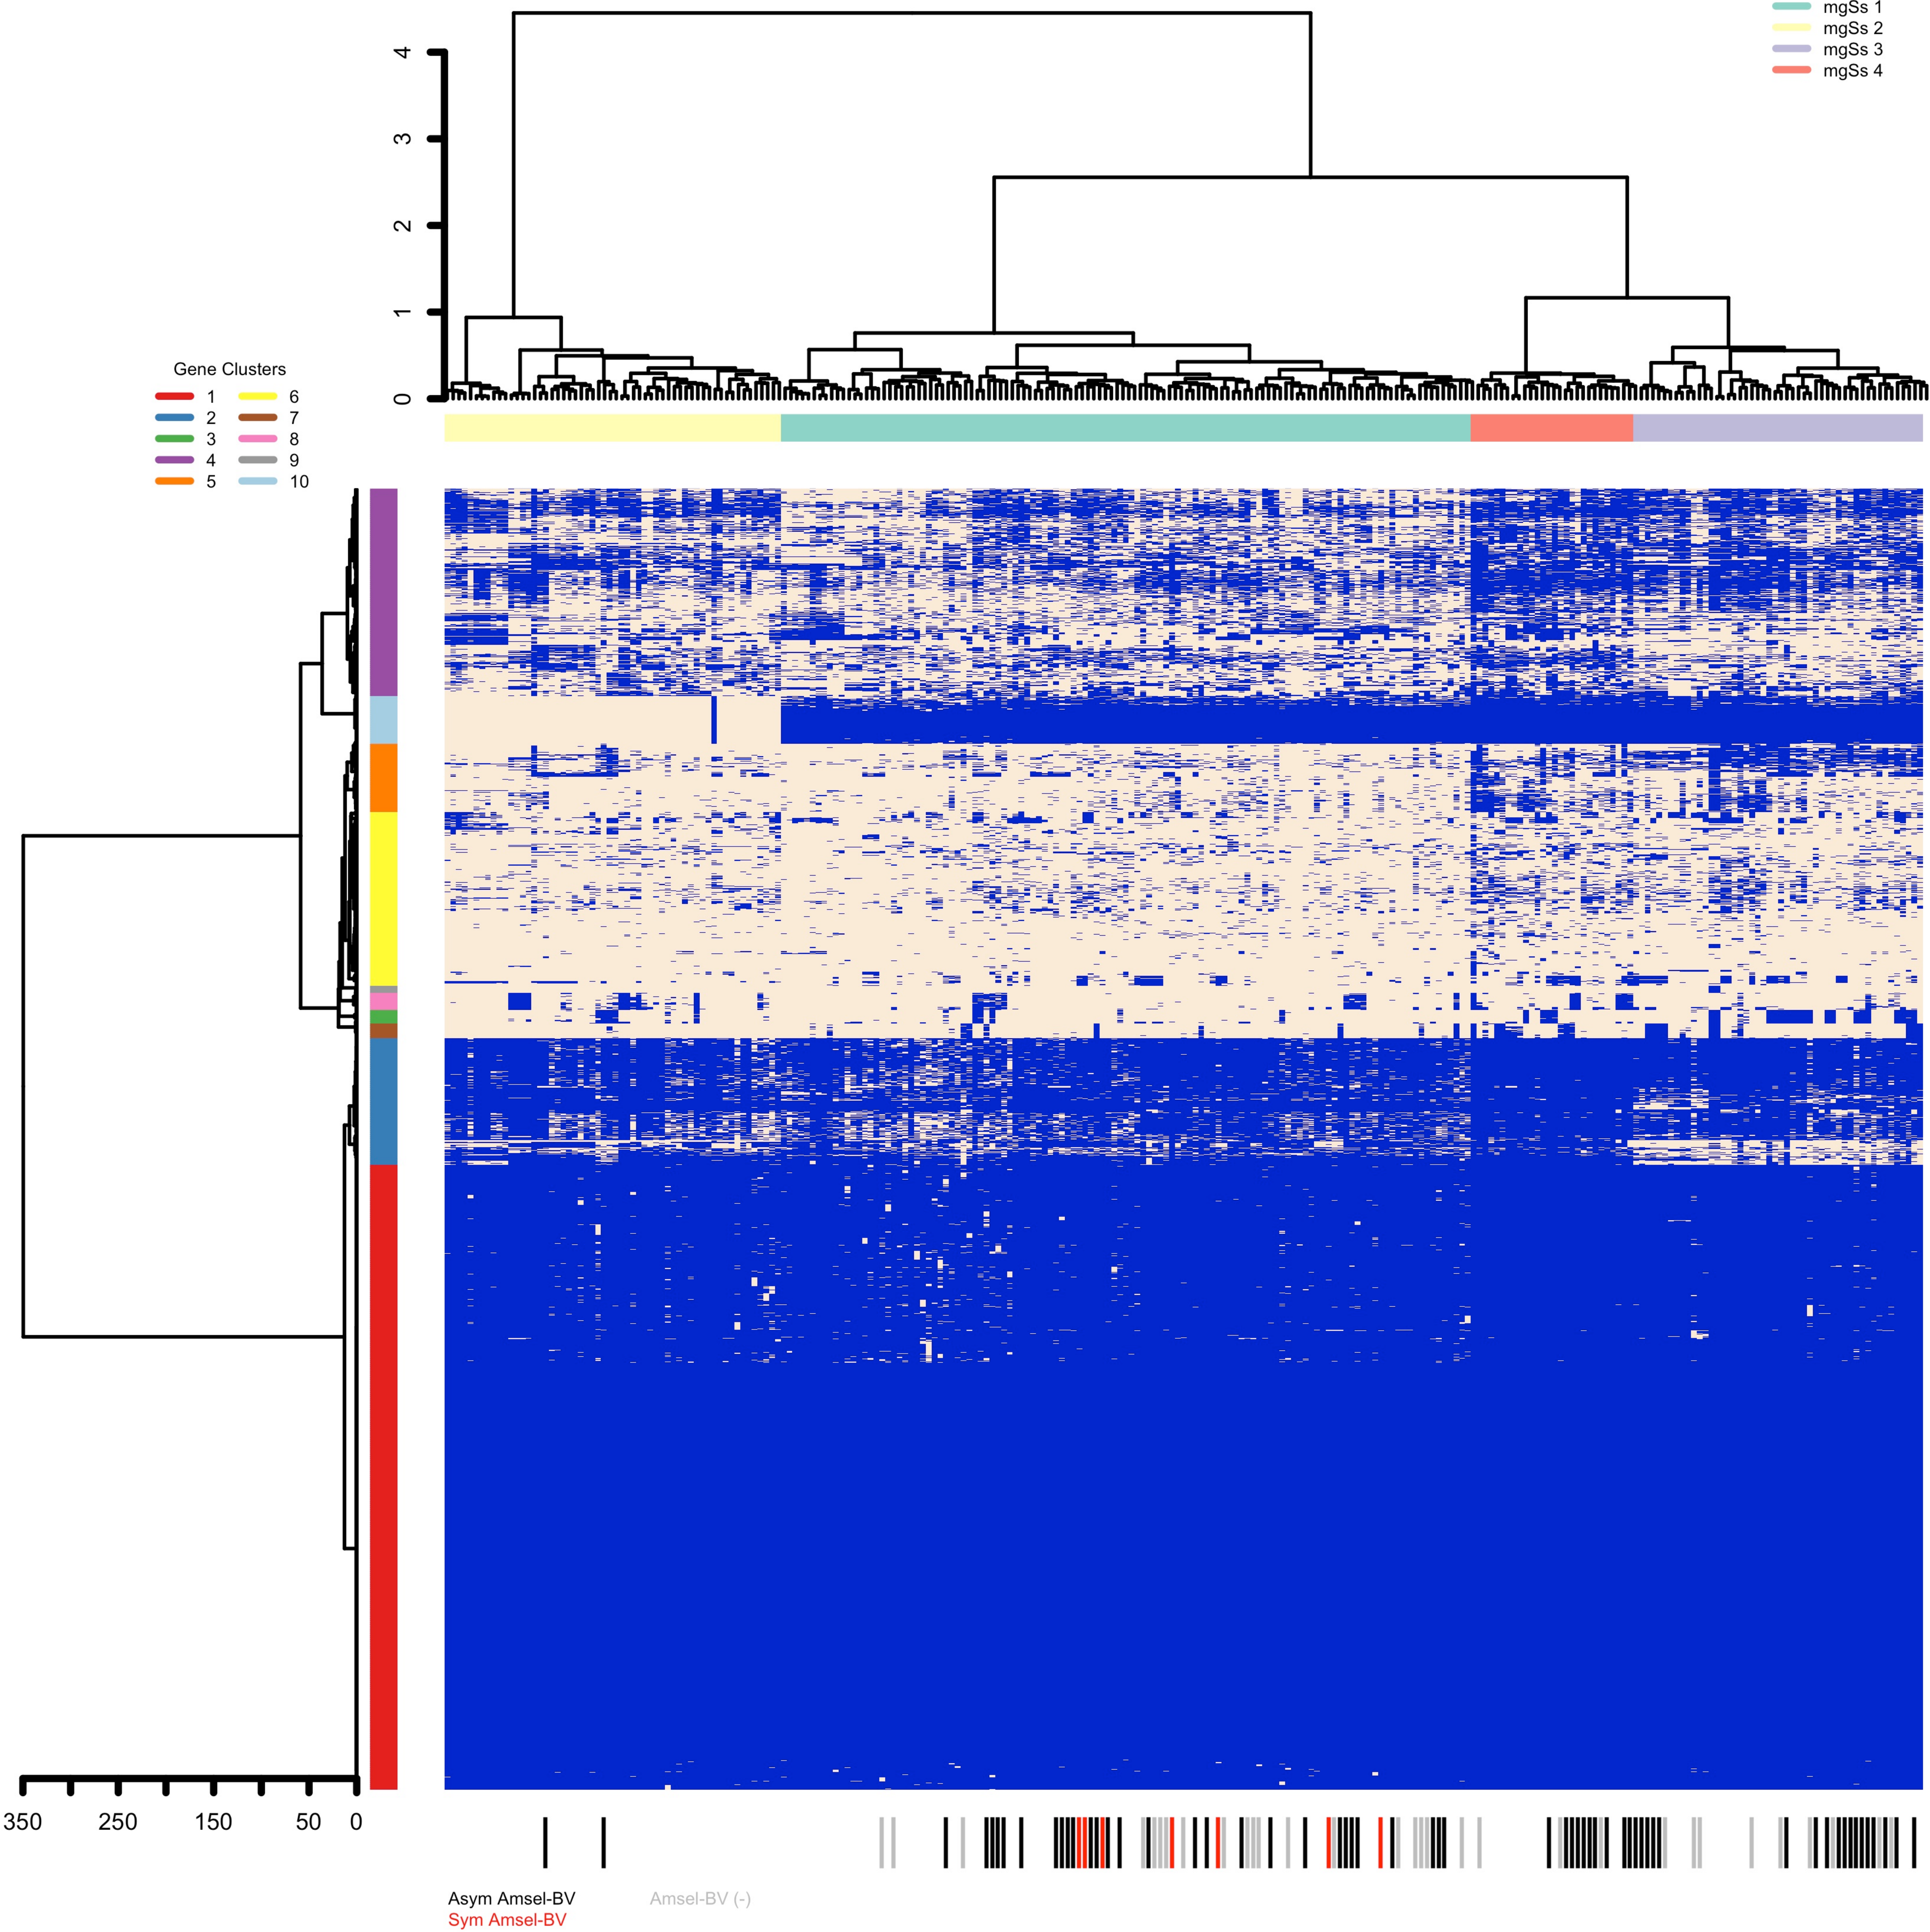

Prevotella buccalis mgSs  
Number of Samples=83, Number of Genes=4544

mgSs 1  
mgSs 2  
mgSs 3

Gene Clusters

1 6  
2 7  
3 8  
4 9  
5 10

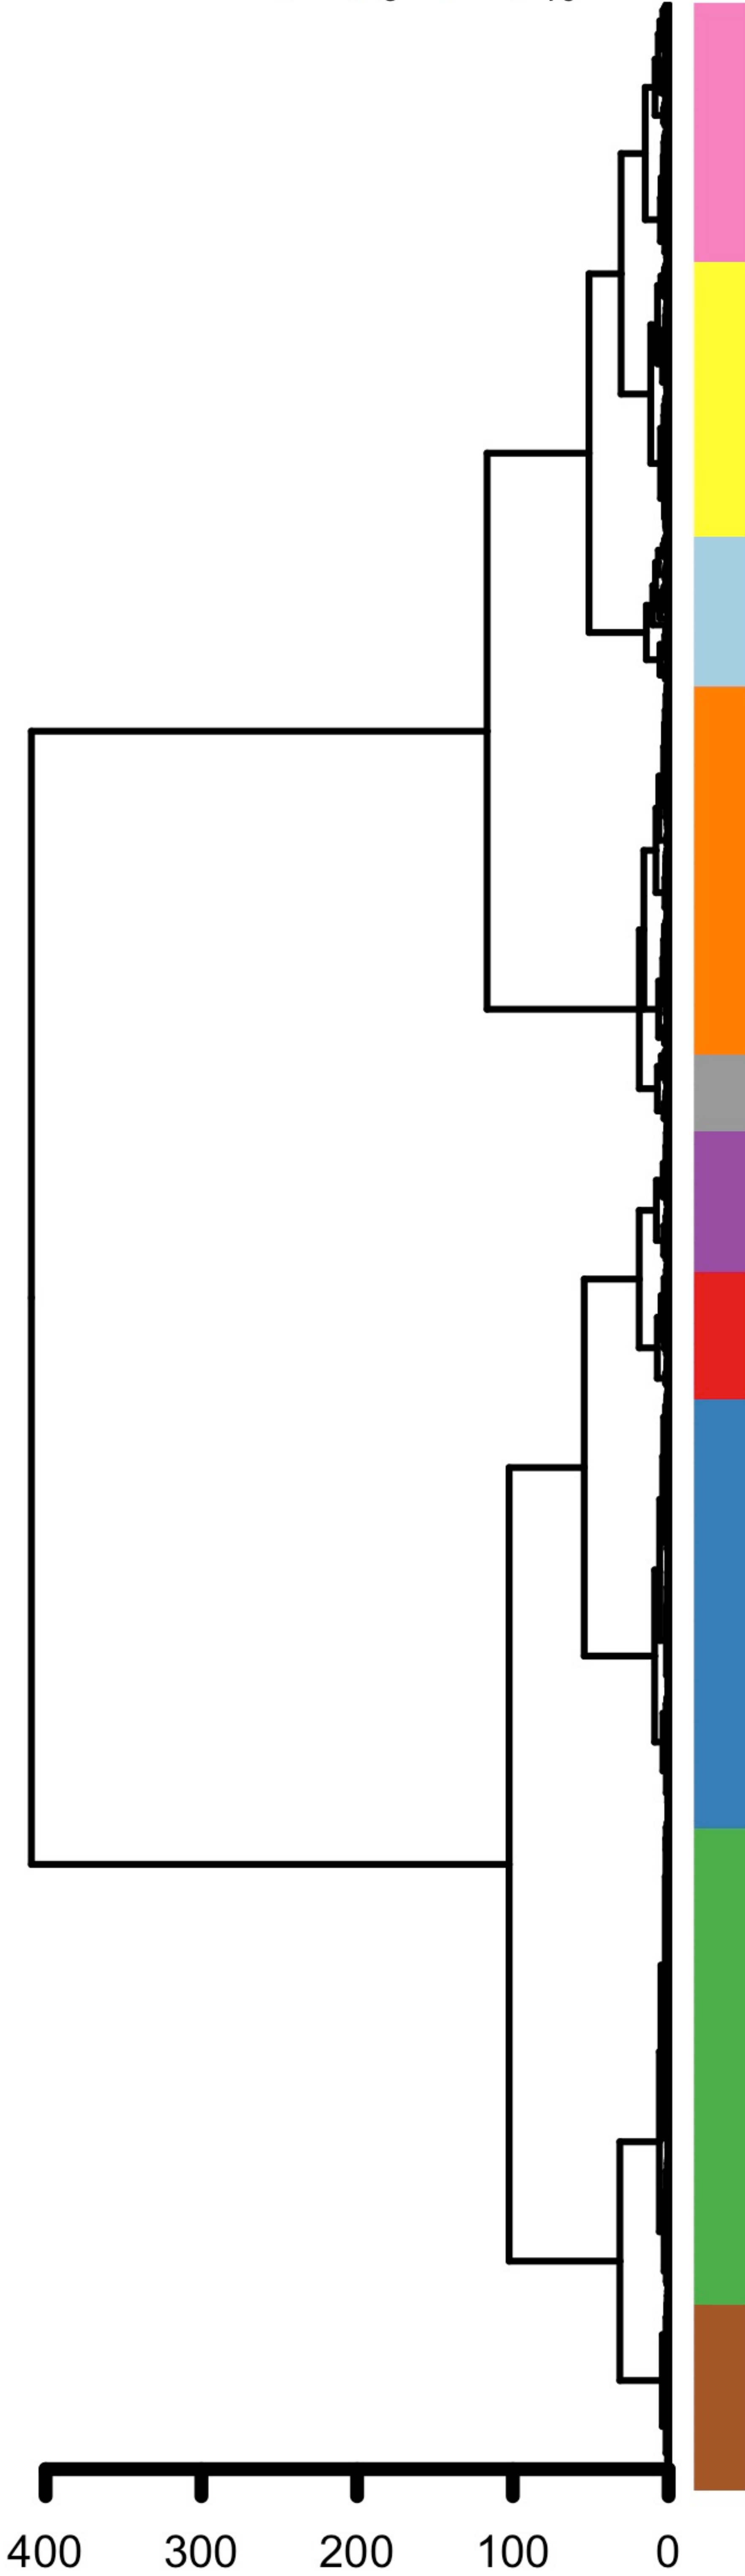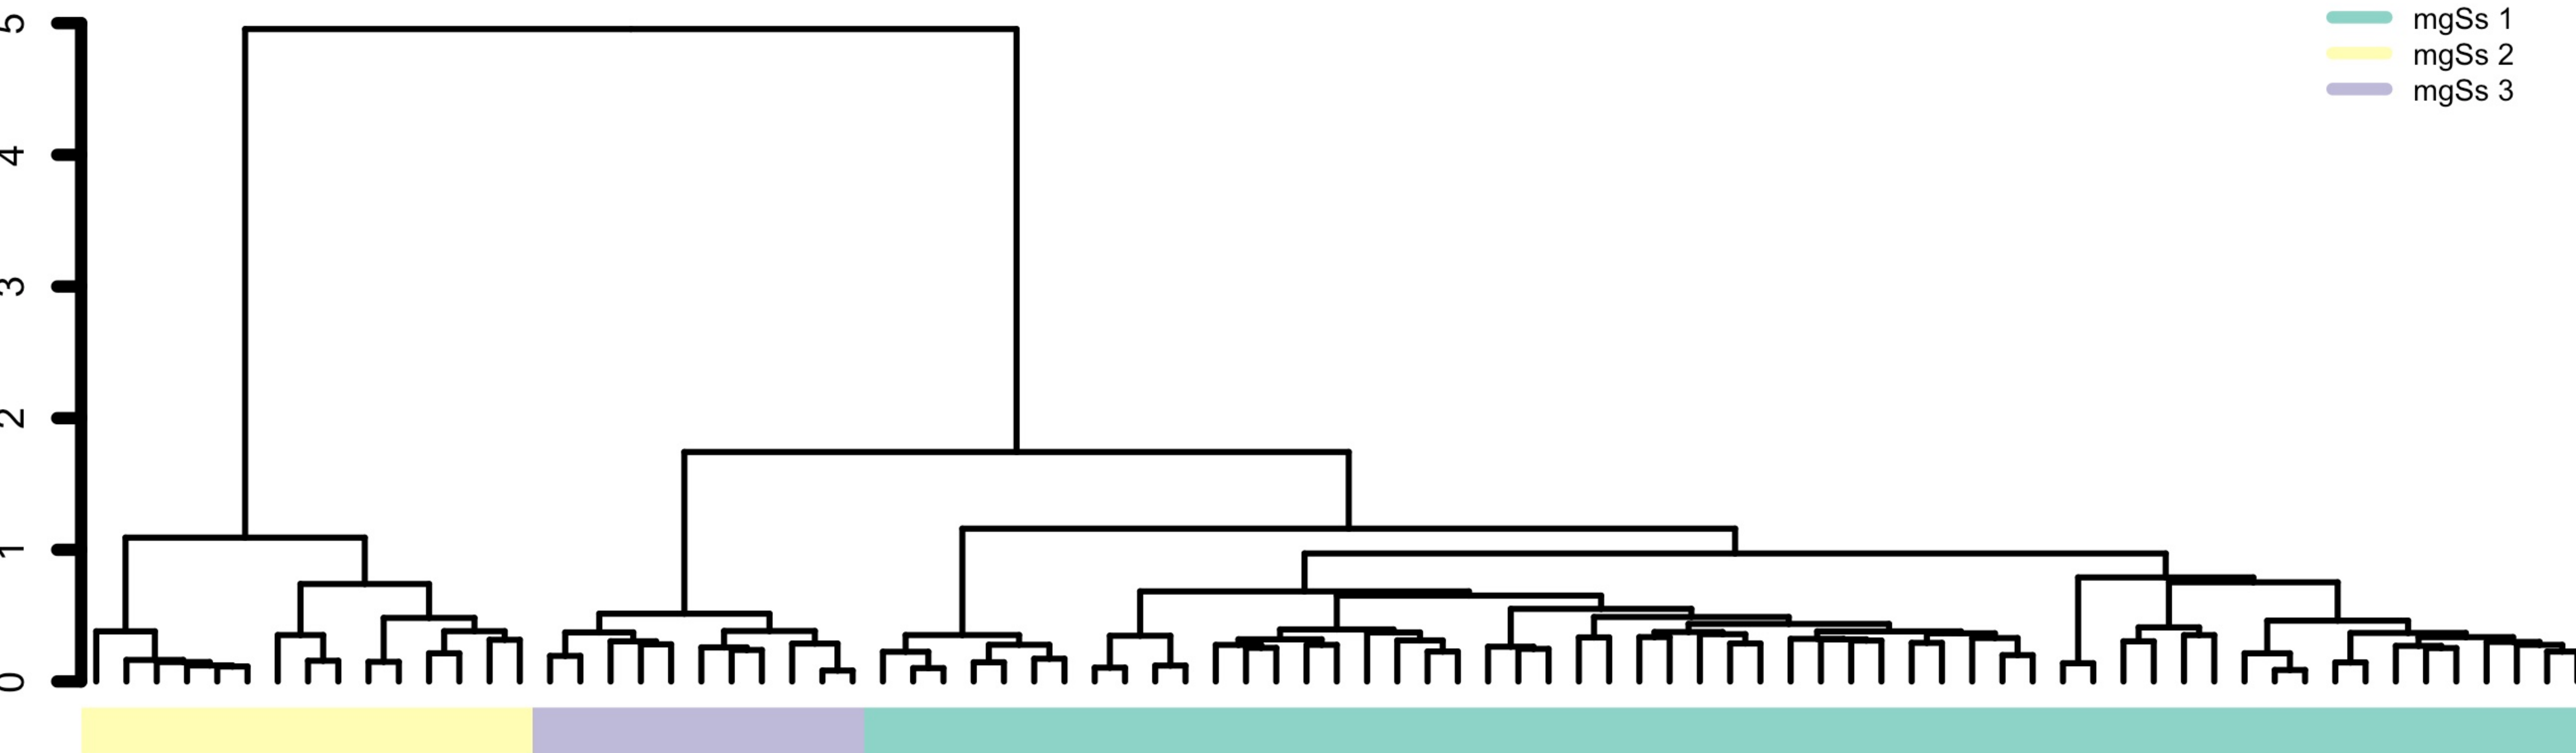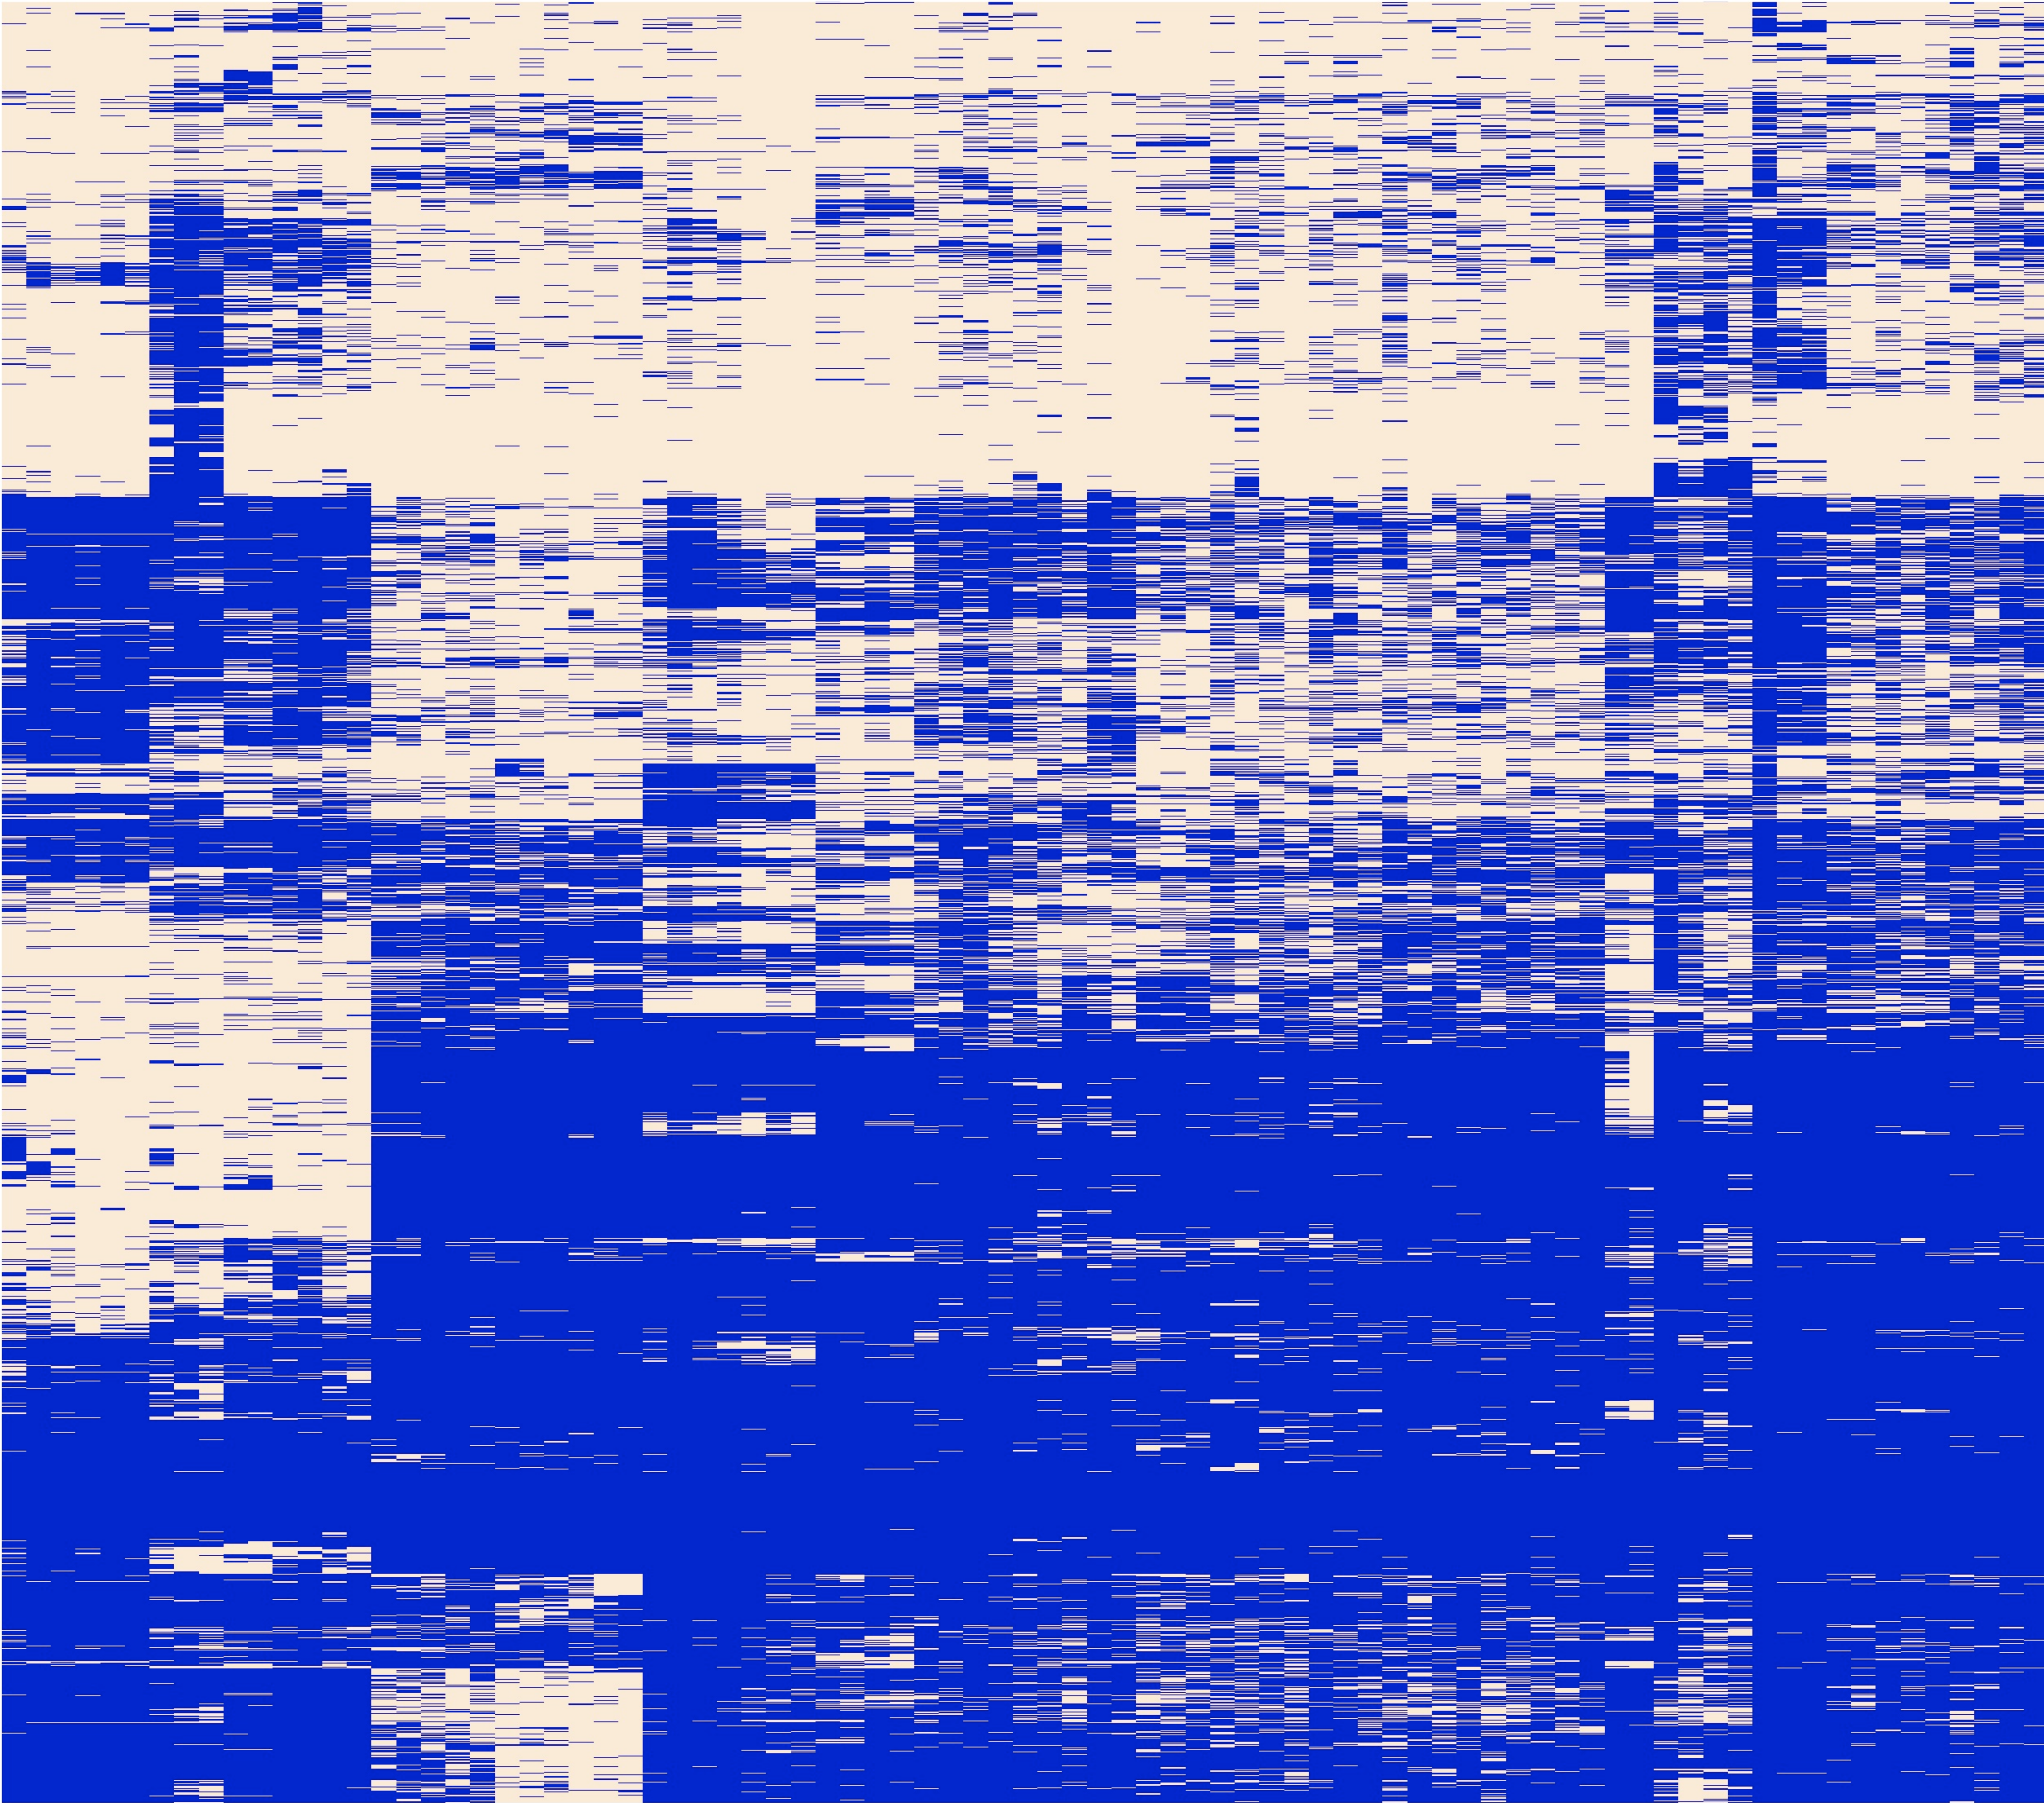

Asym Amsel-BV  
Sym Amsel-BV  
Amsel-BV (-)

Prevotella disiens mgSs  
Number of Samples=29, Number of Genes=2550

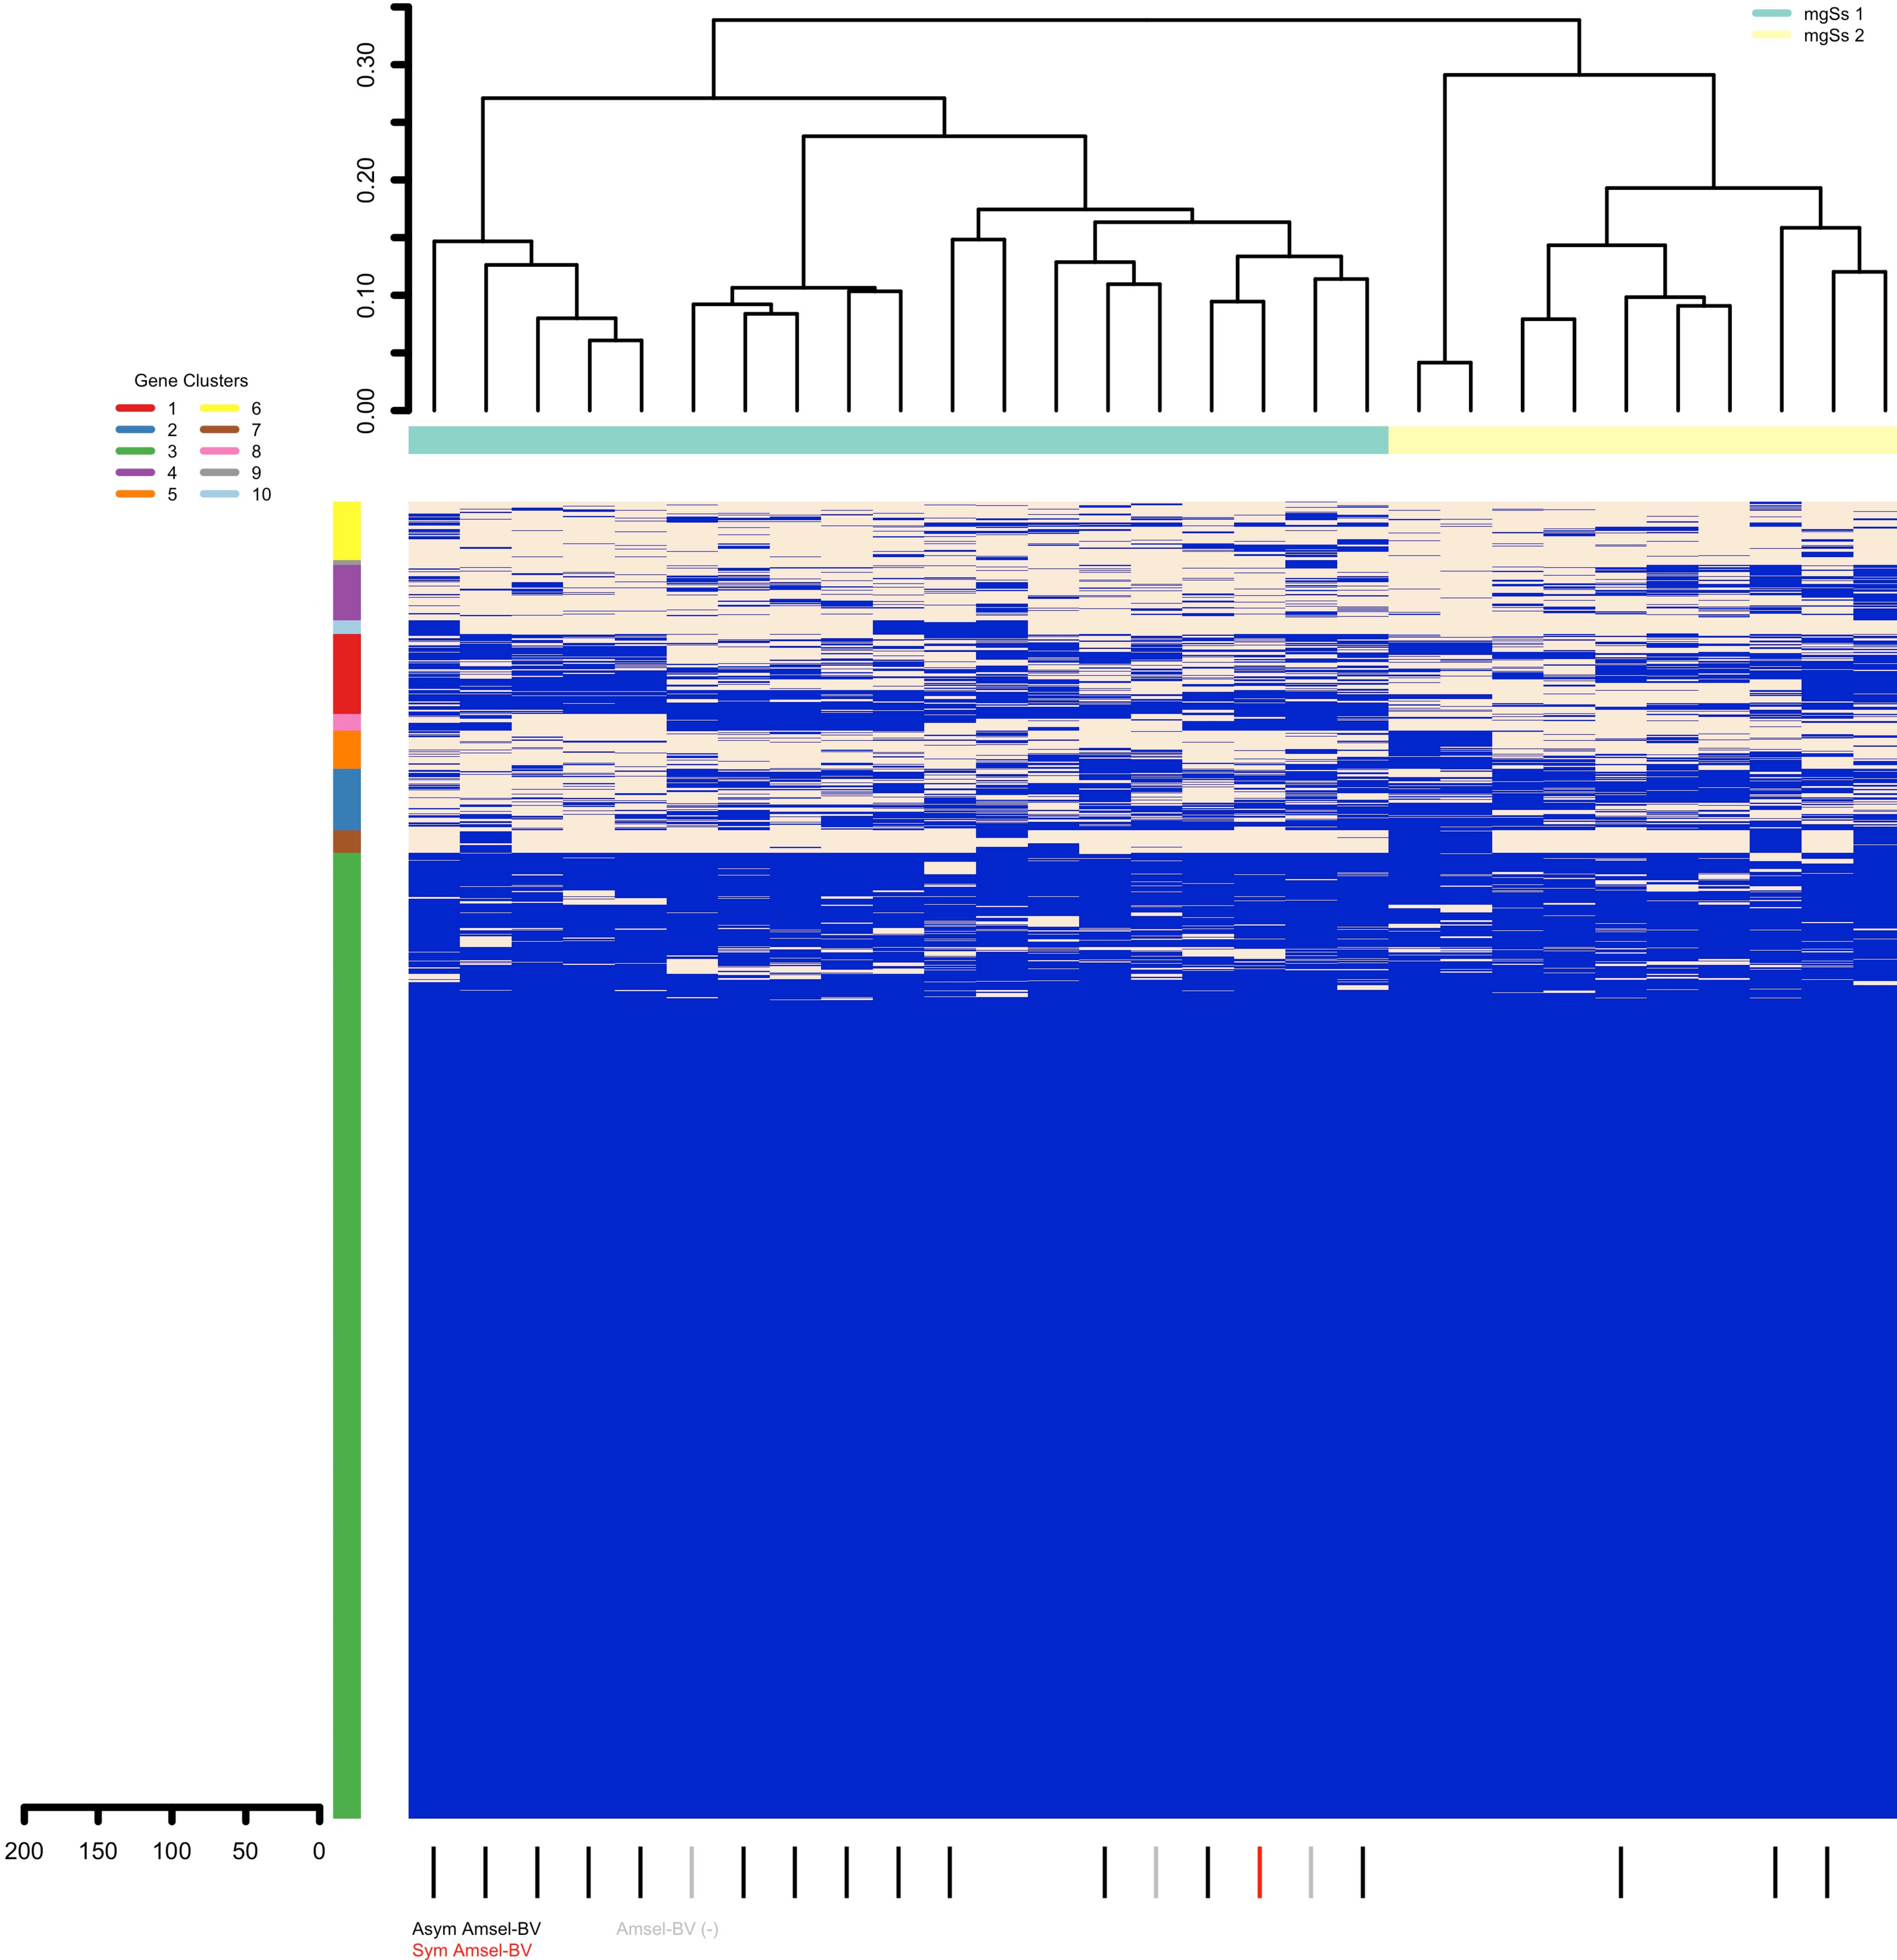

Prevotella sp. mgSs  
Number of Samples=394, Number of Genes=2490

- mgSs 1
- mgSs 2
- mgSs 3
- mgSs 4
- mgSs 5
- mgSs 6

- Gene Clusters
- 1
  - 2
  - 3
  - 4
  - 5
  - 6
  - 7
  - 8
  - 9
  - 10

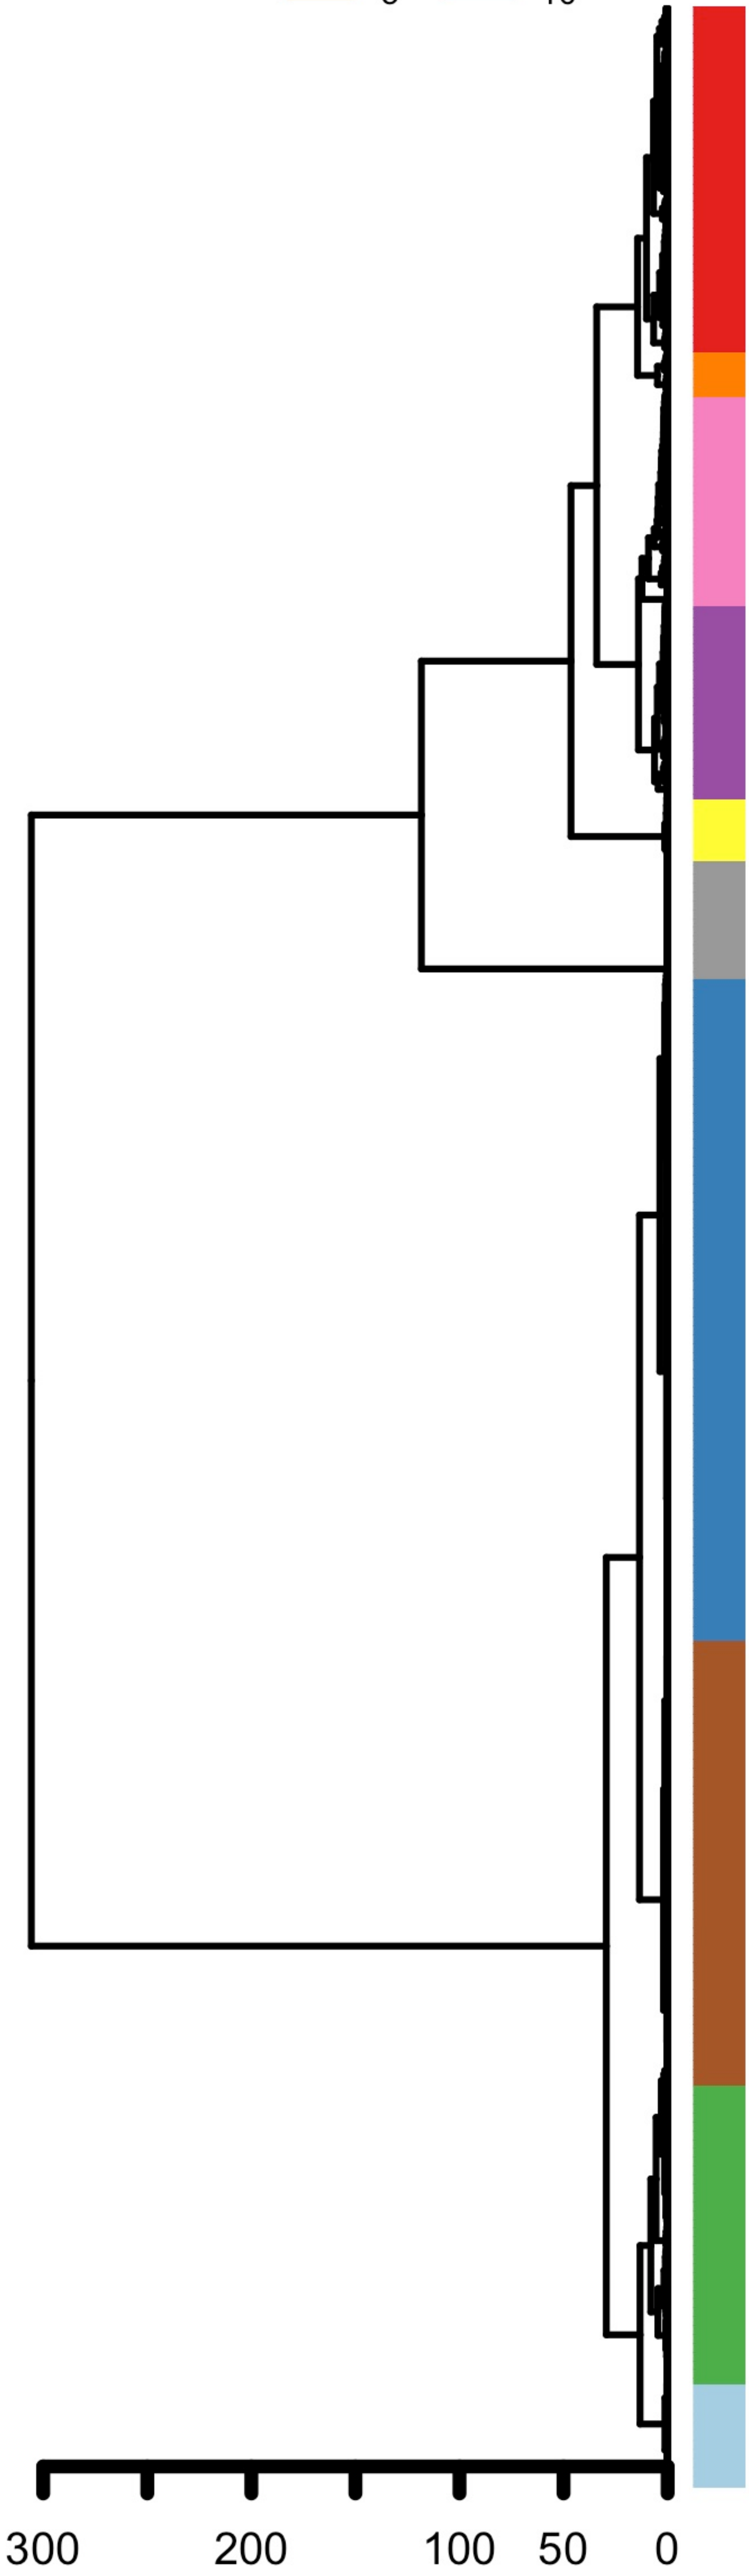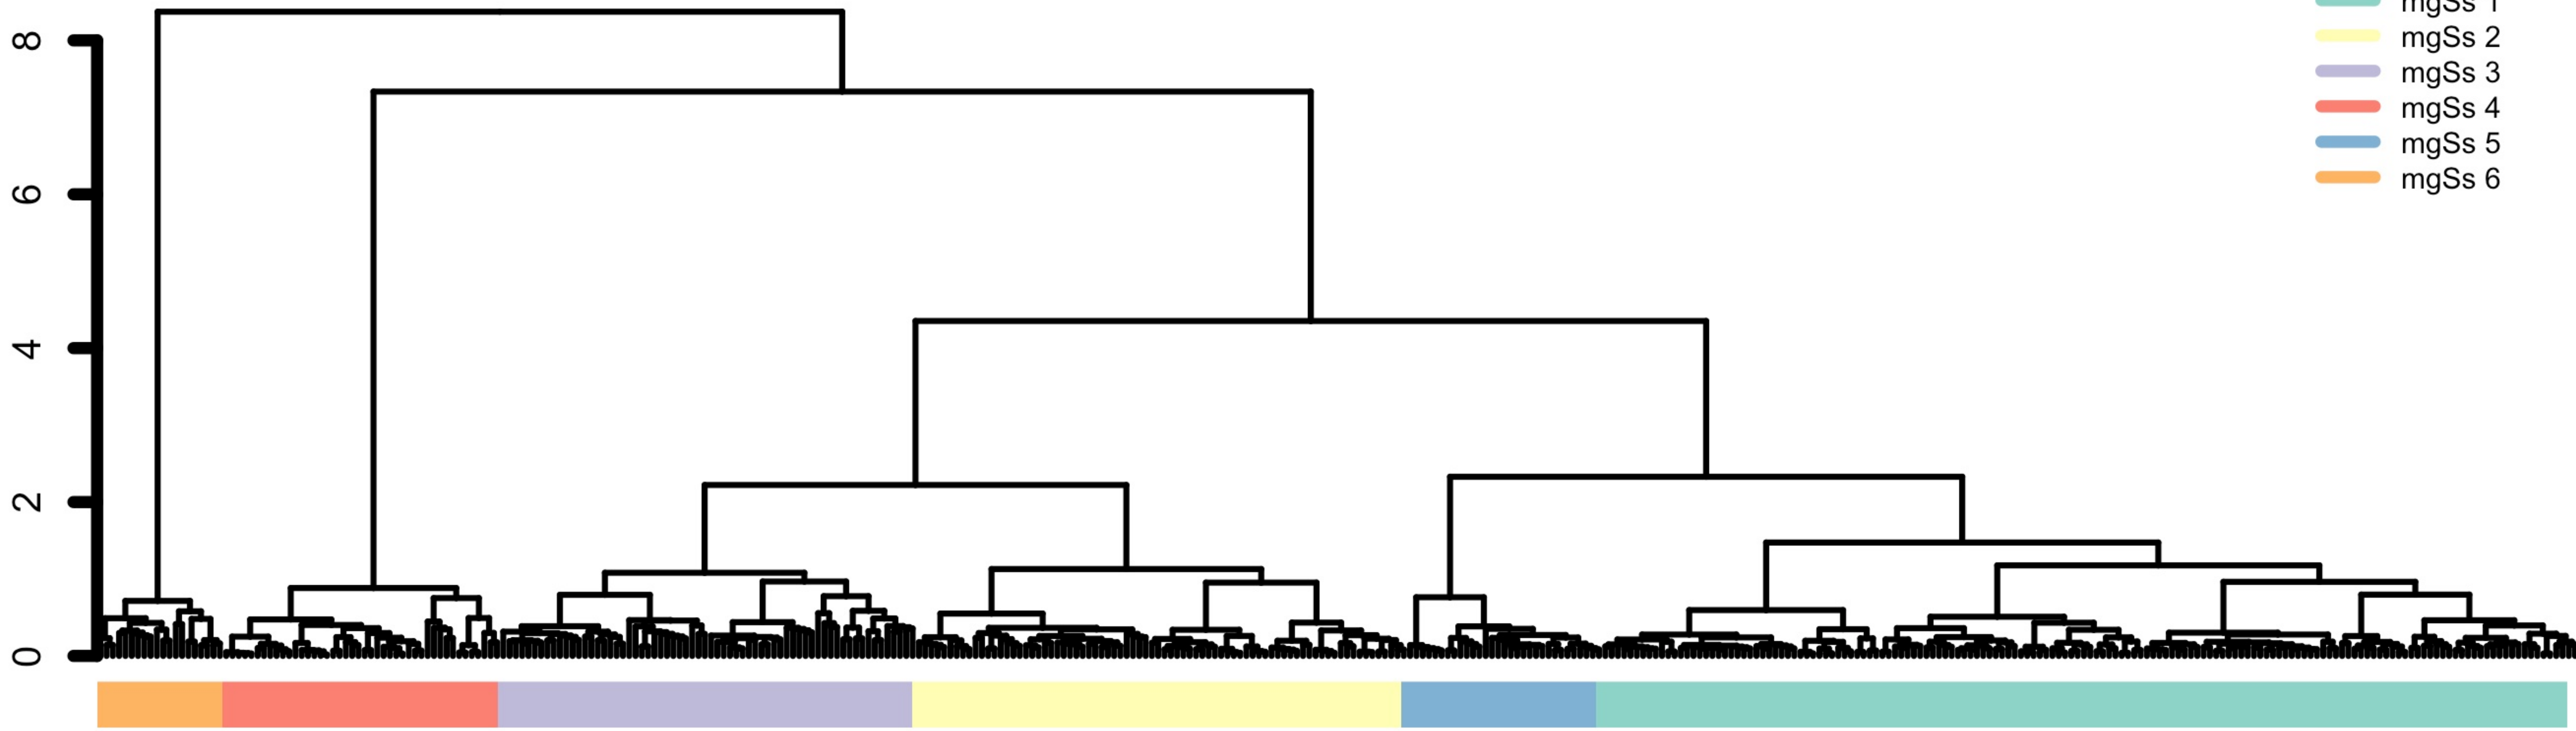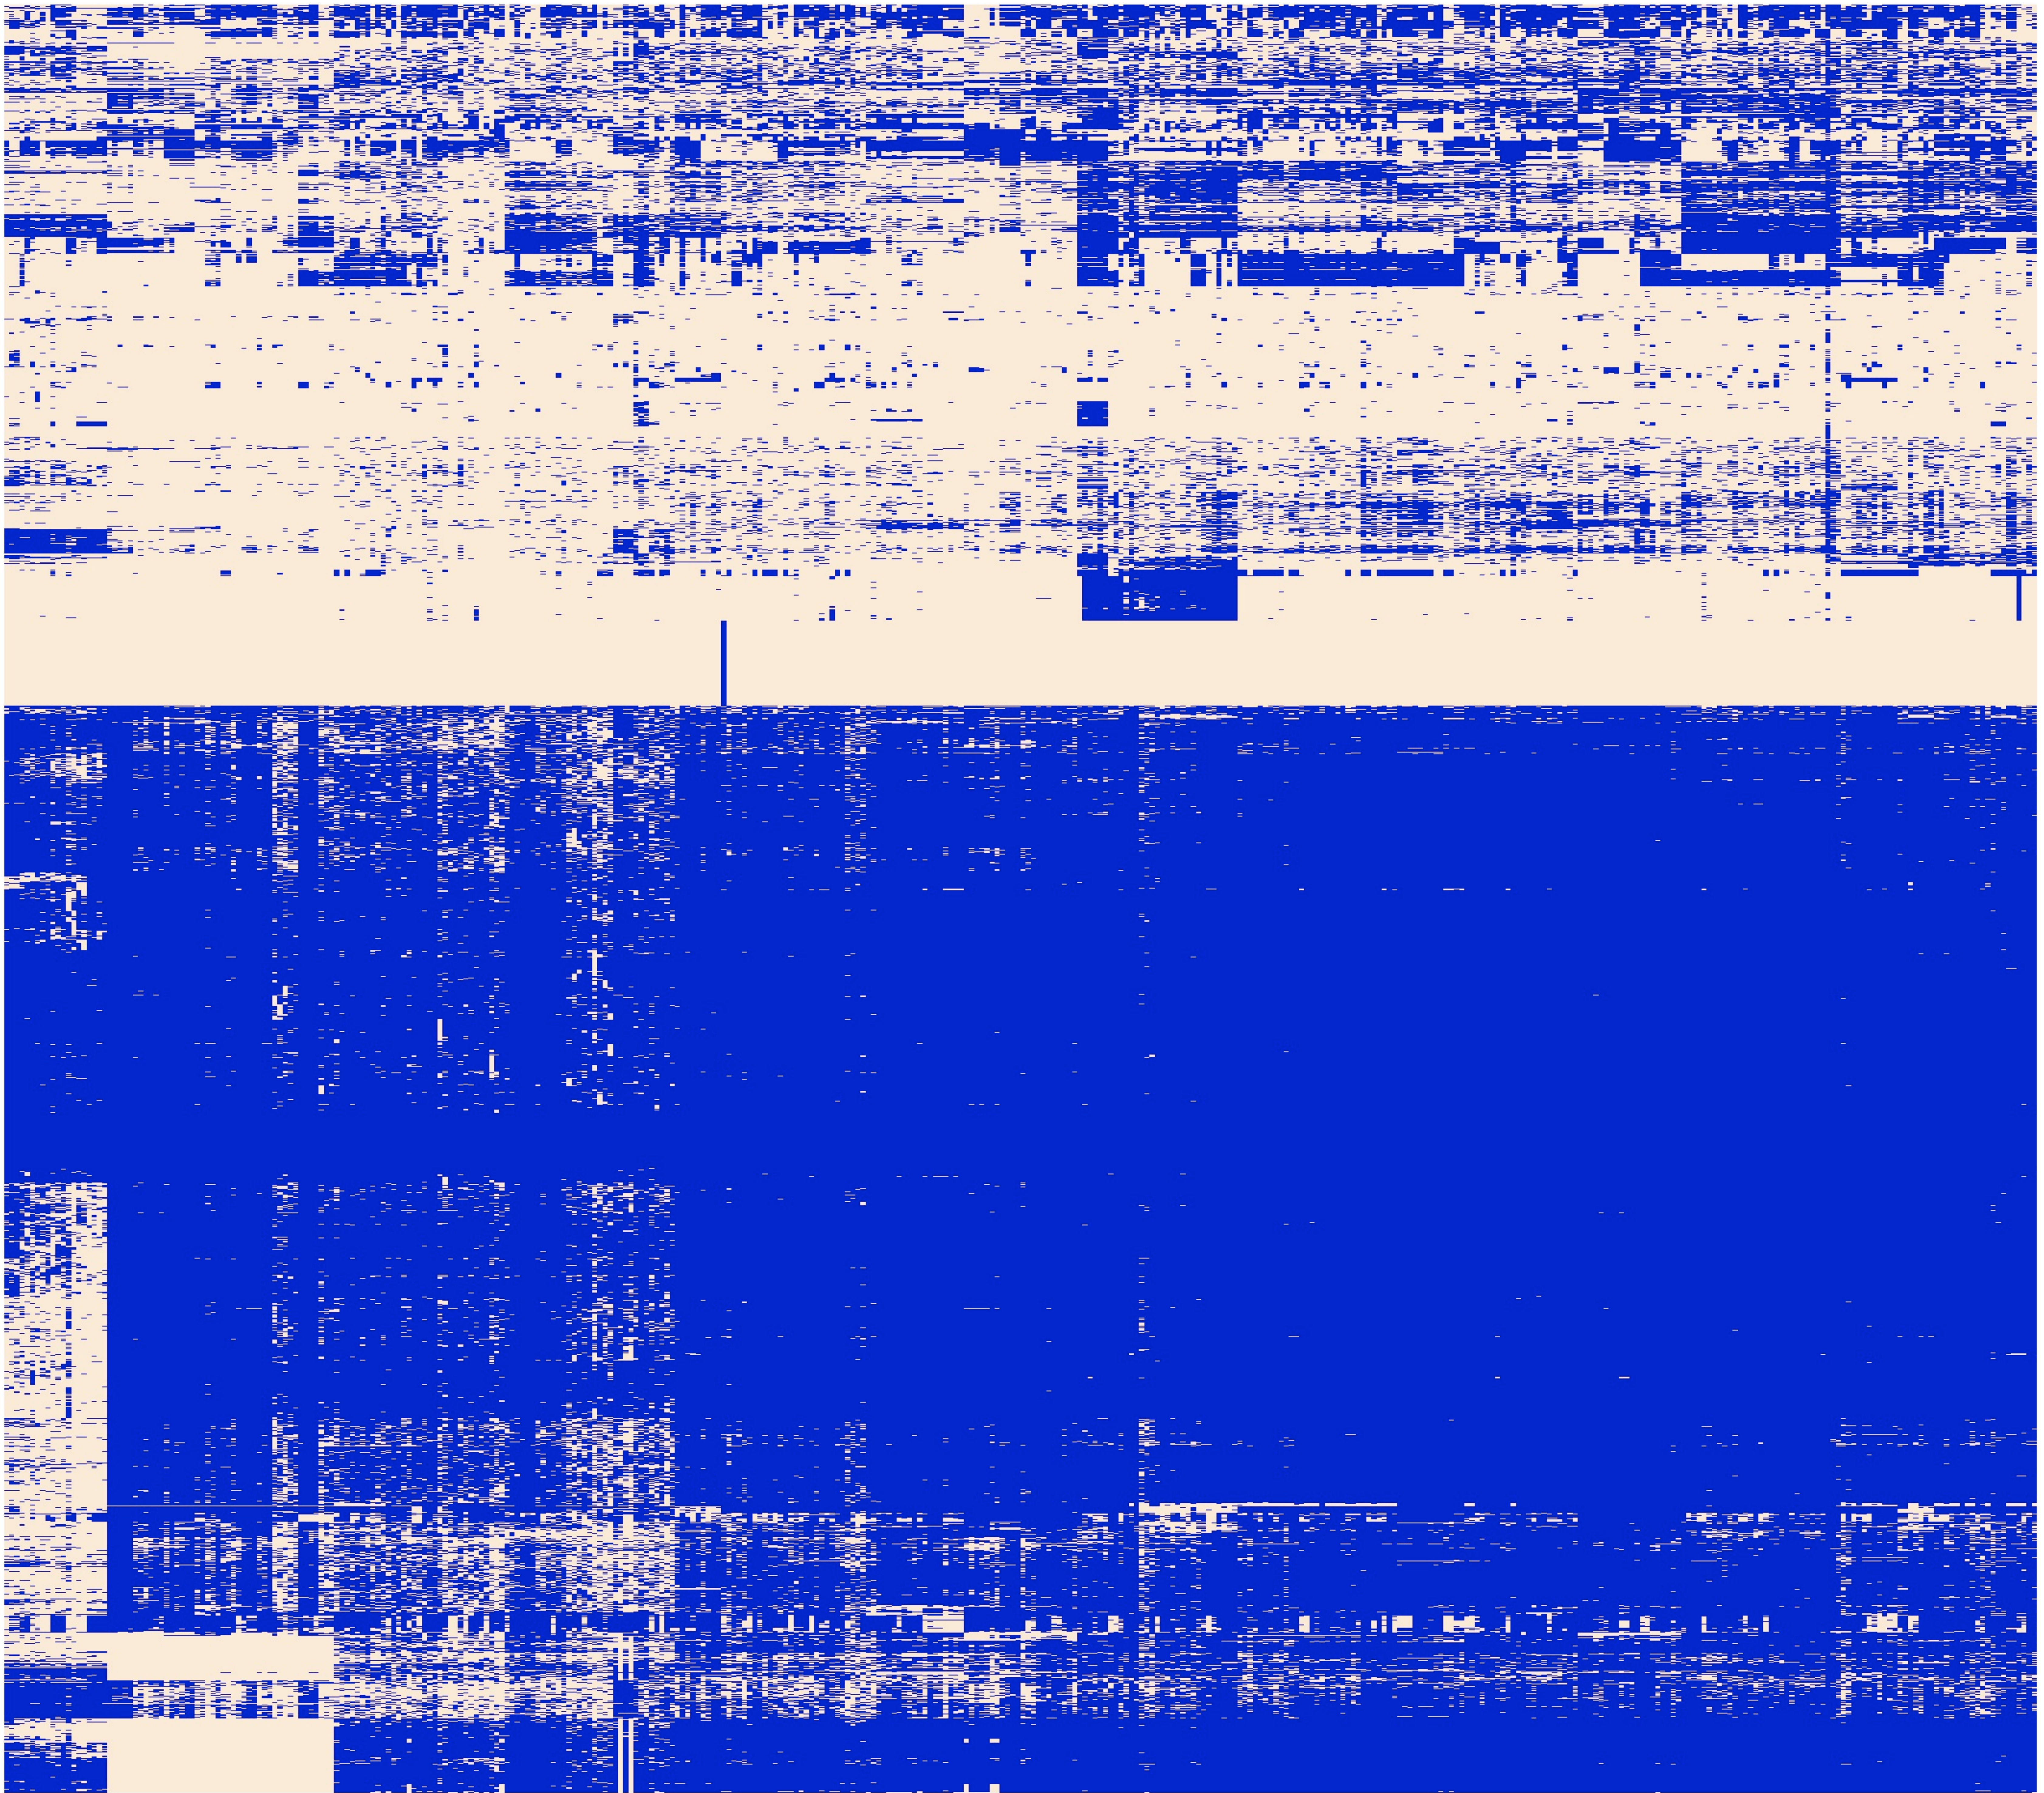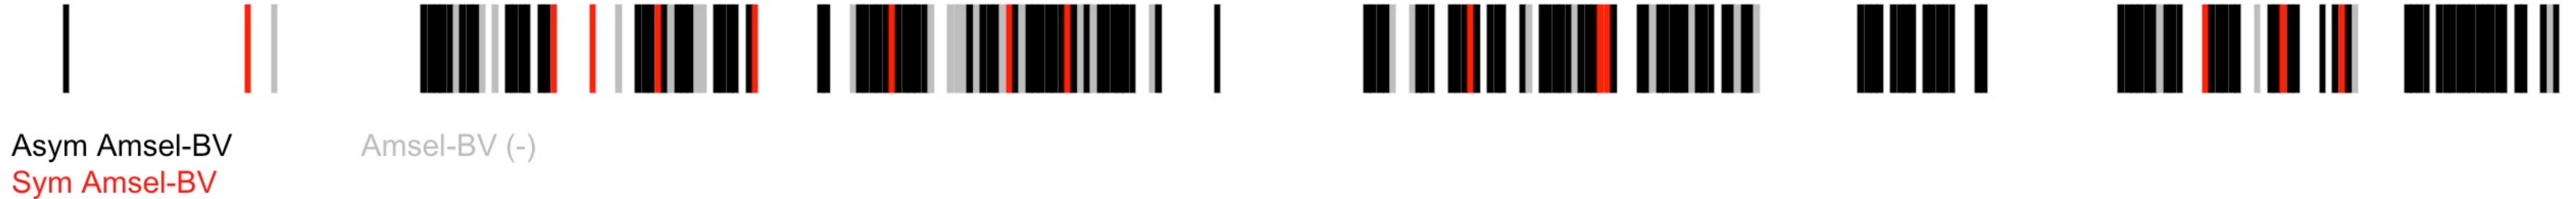

Prevotella timonensis mgSs  
Number of Samples=285, Number of Genes=5200

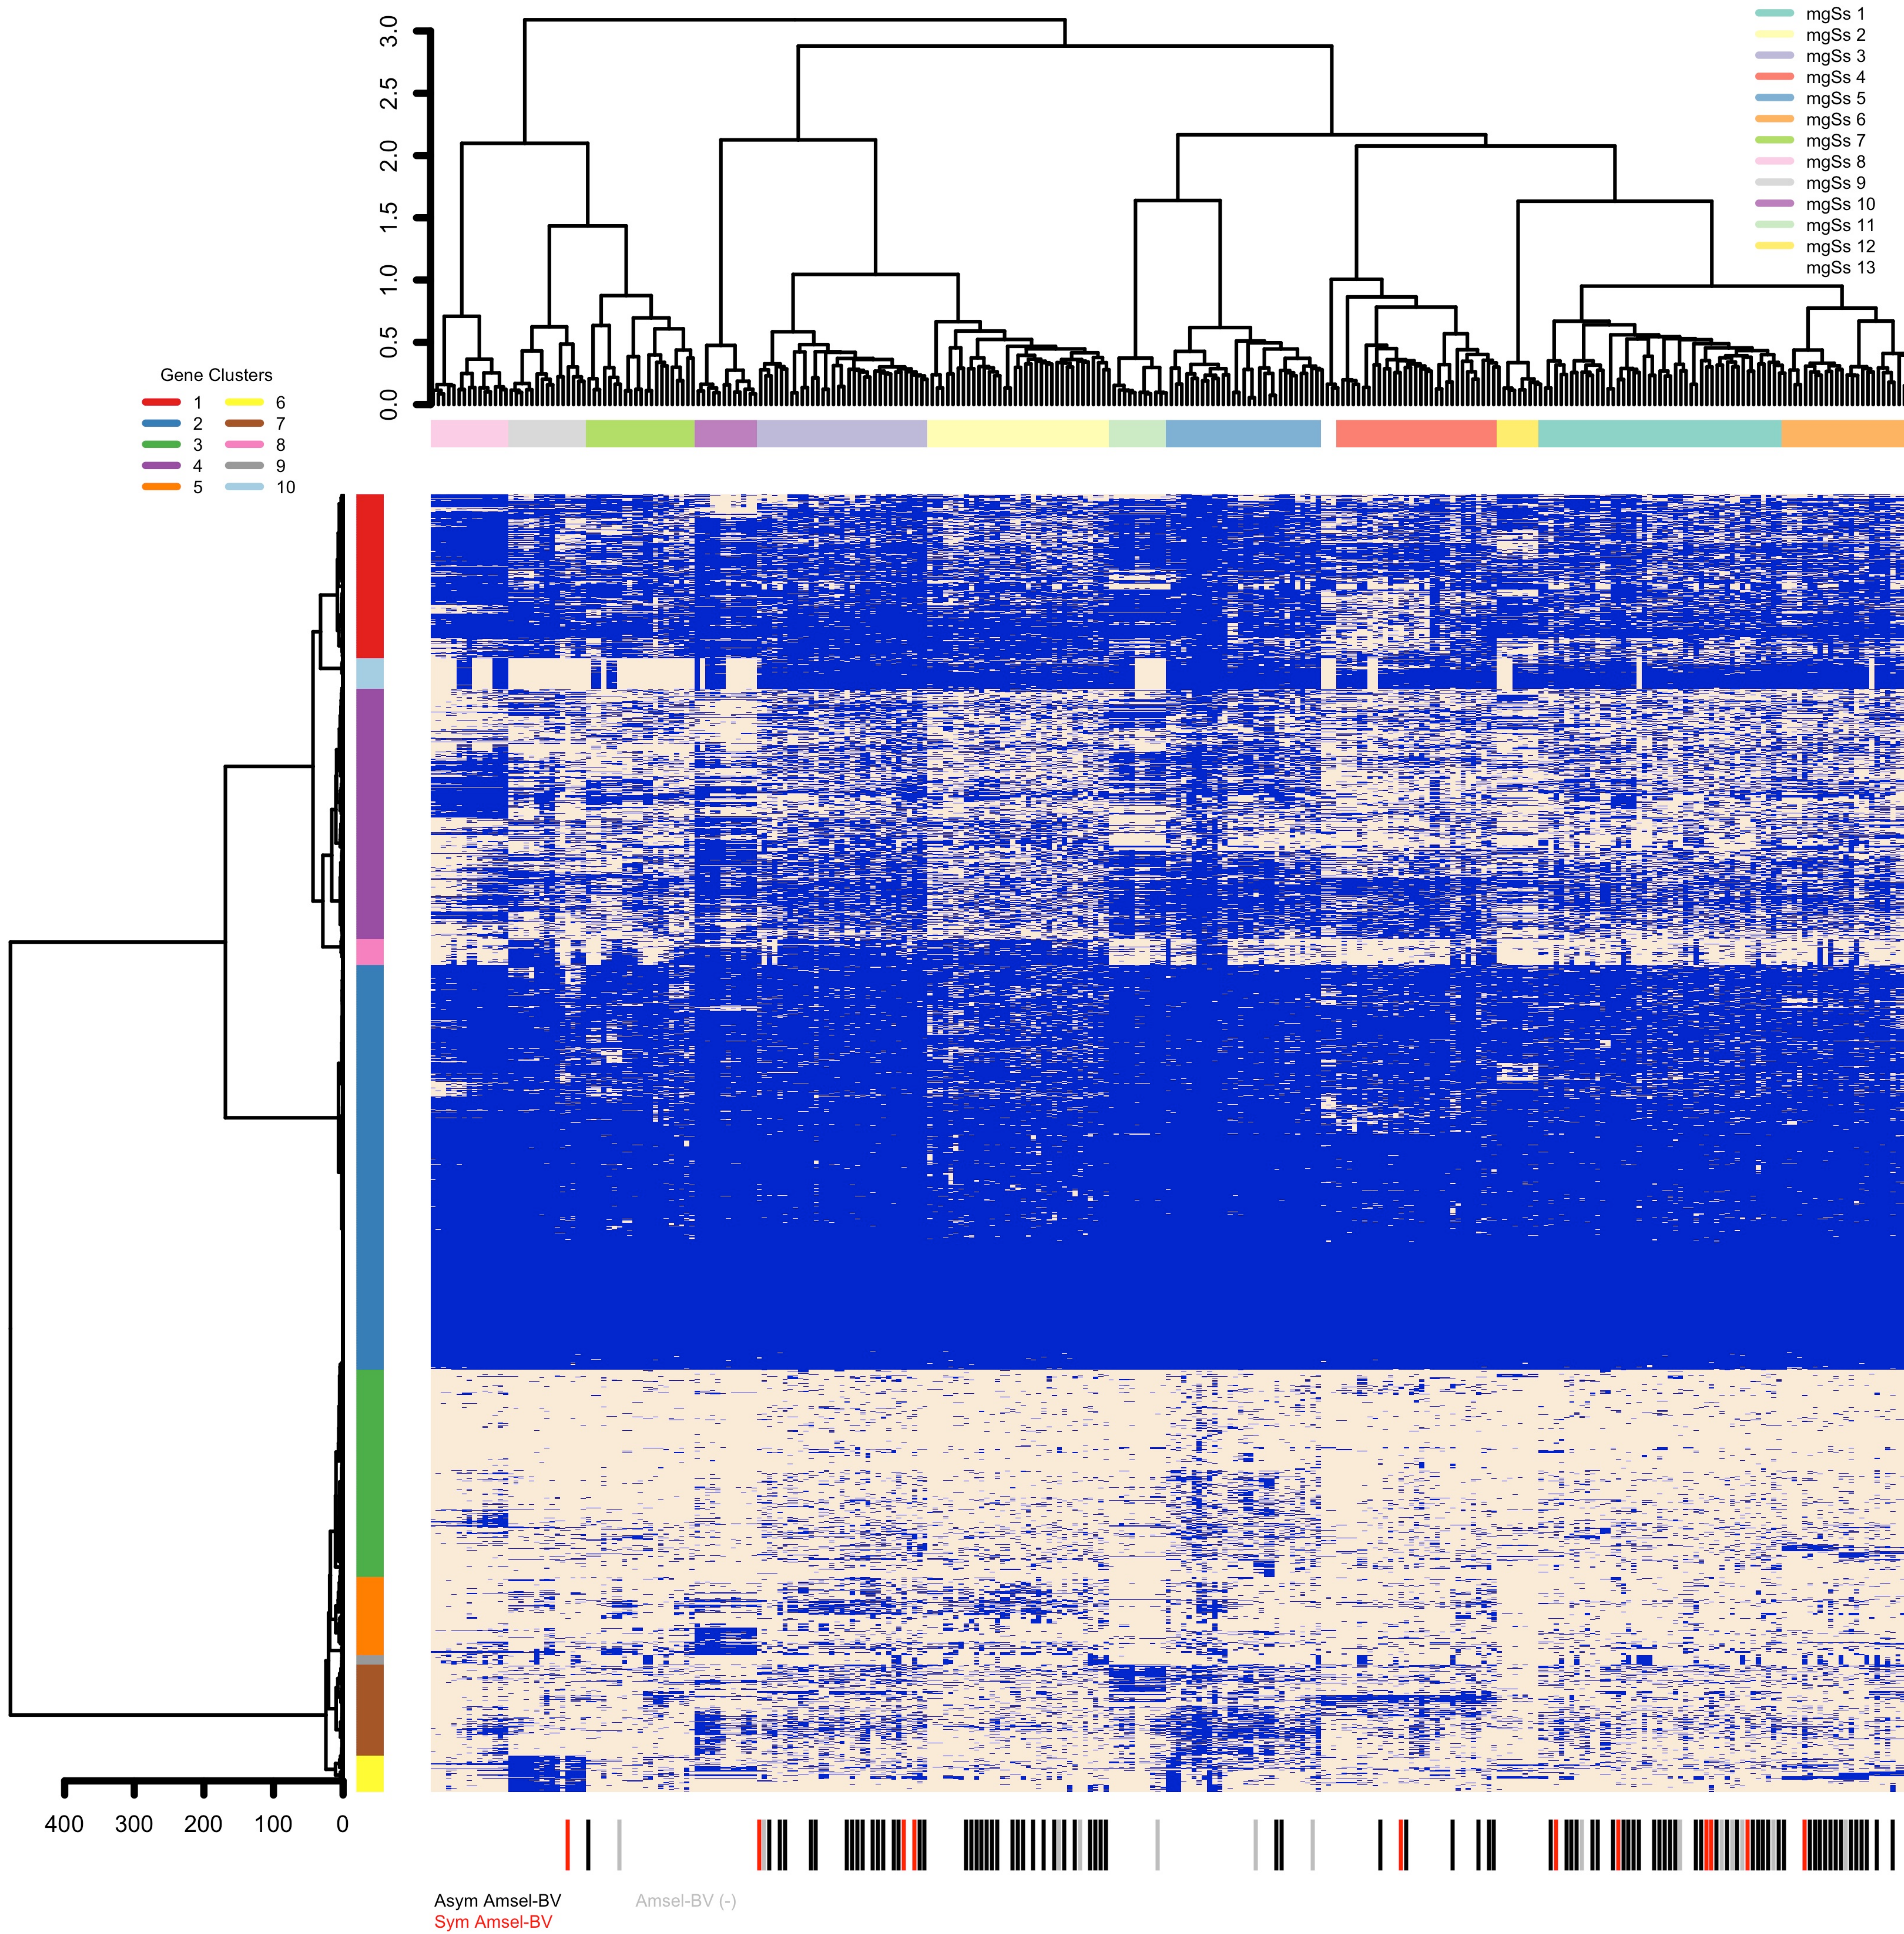

Sneathia amnii mgSs  
Number of Samples=435, Number of Genes=1114

- mgSs 1
- mgSs 2
- mgSs 3
- mgSs 4
- mgSs 5

- Gene Clusters
- |   |    |
|---|----|
| 1 | 6  |
| 2 | 7  |
| 3 | 8  |
| 4 | 9  |
| 5 | 10 |

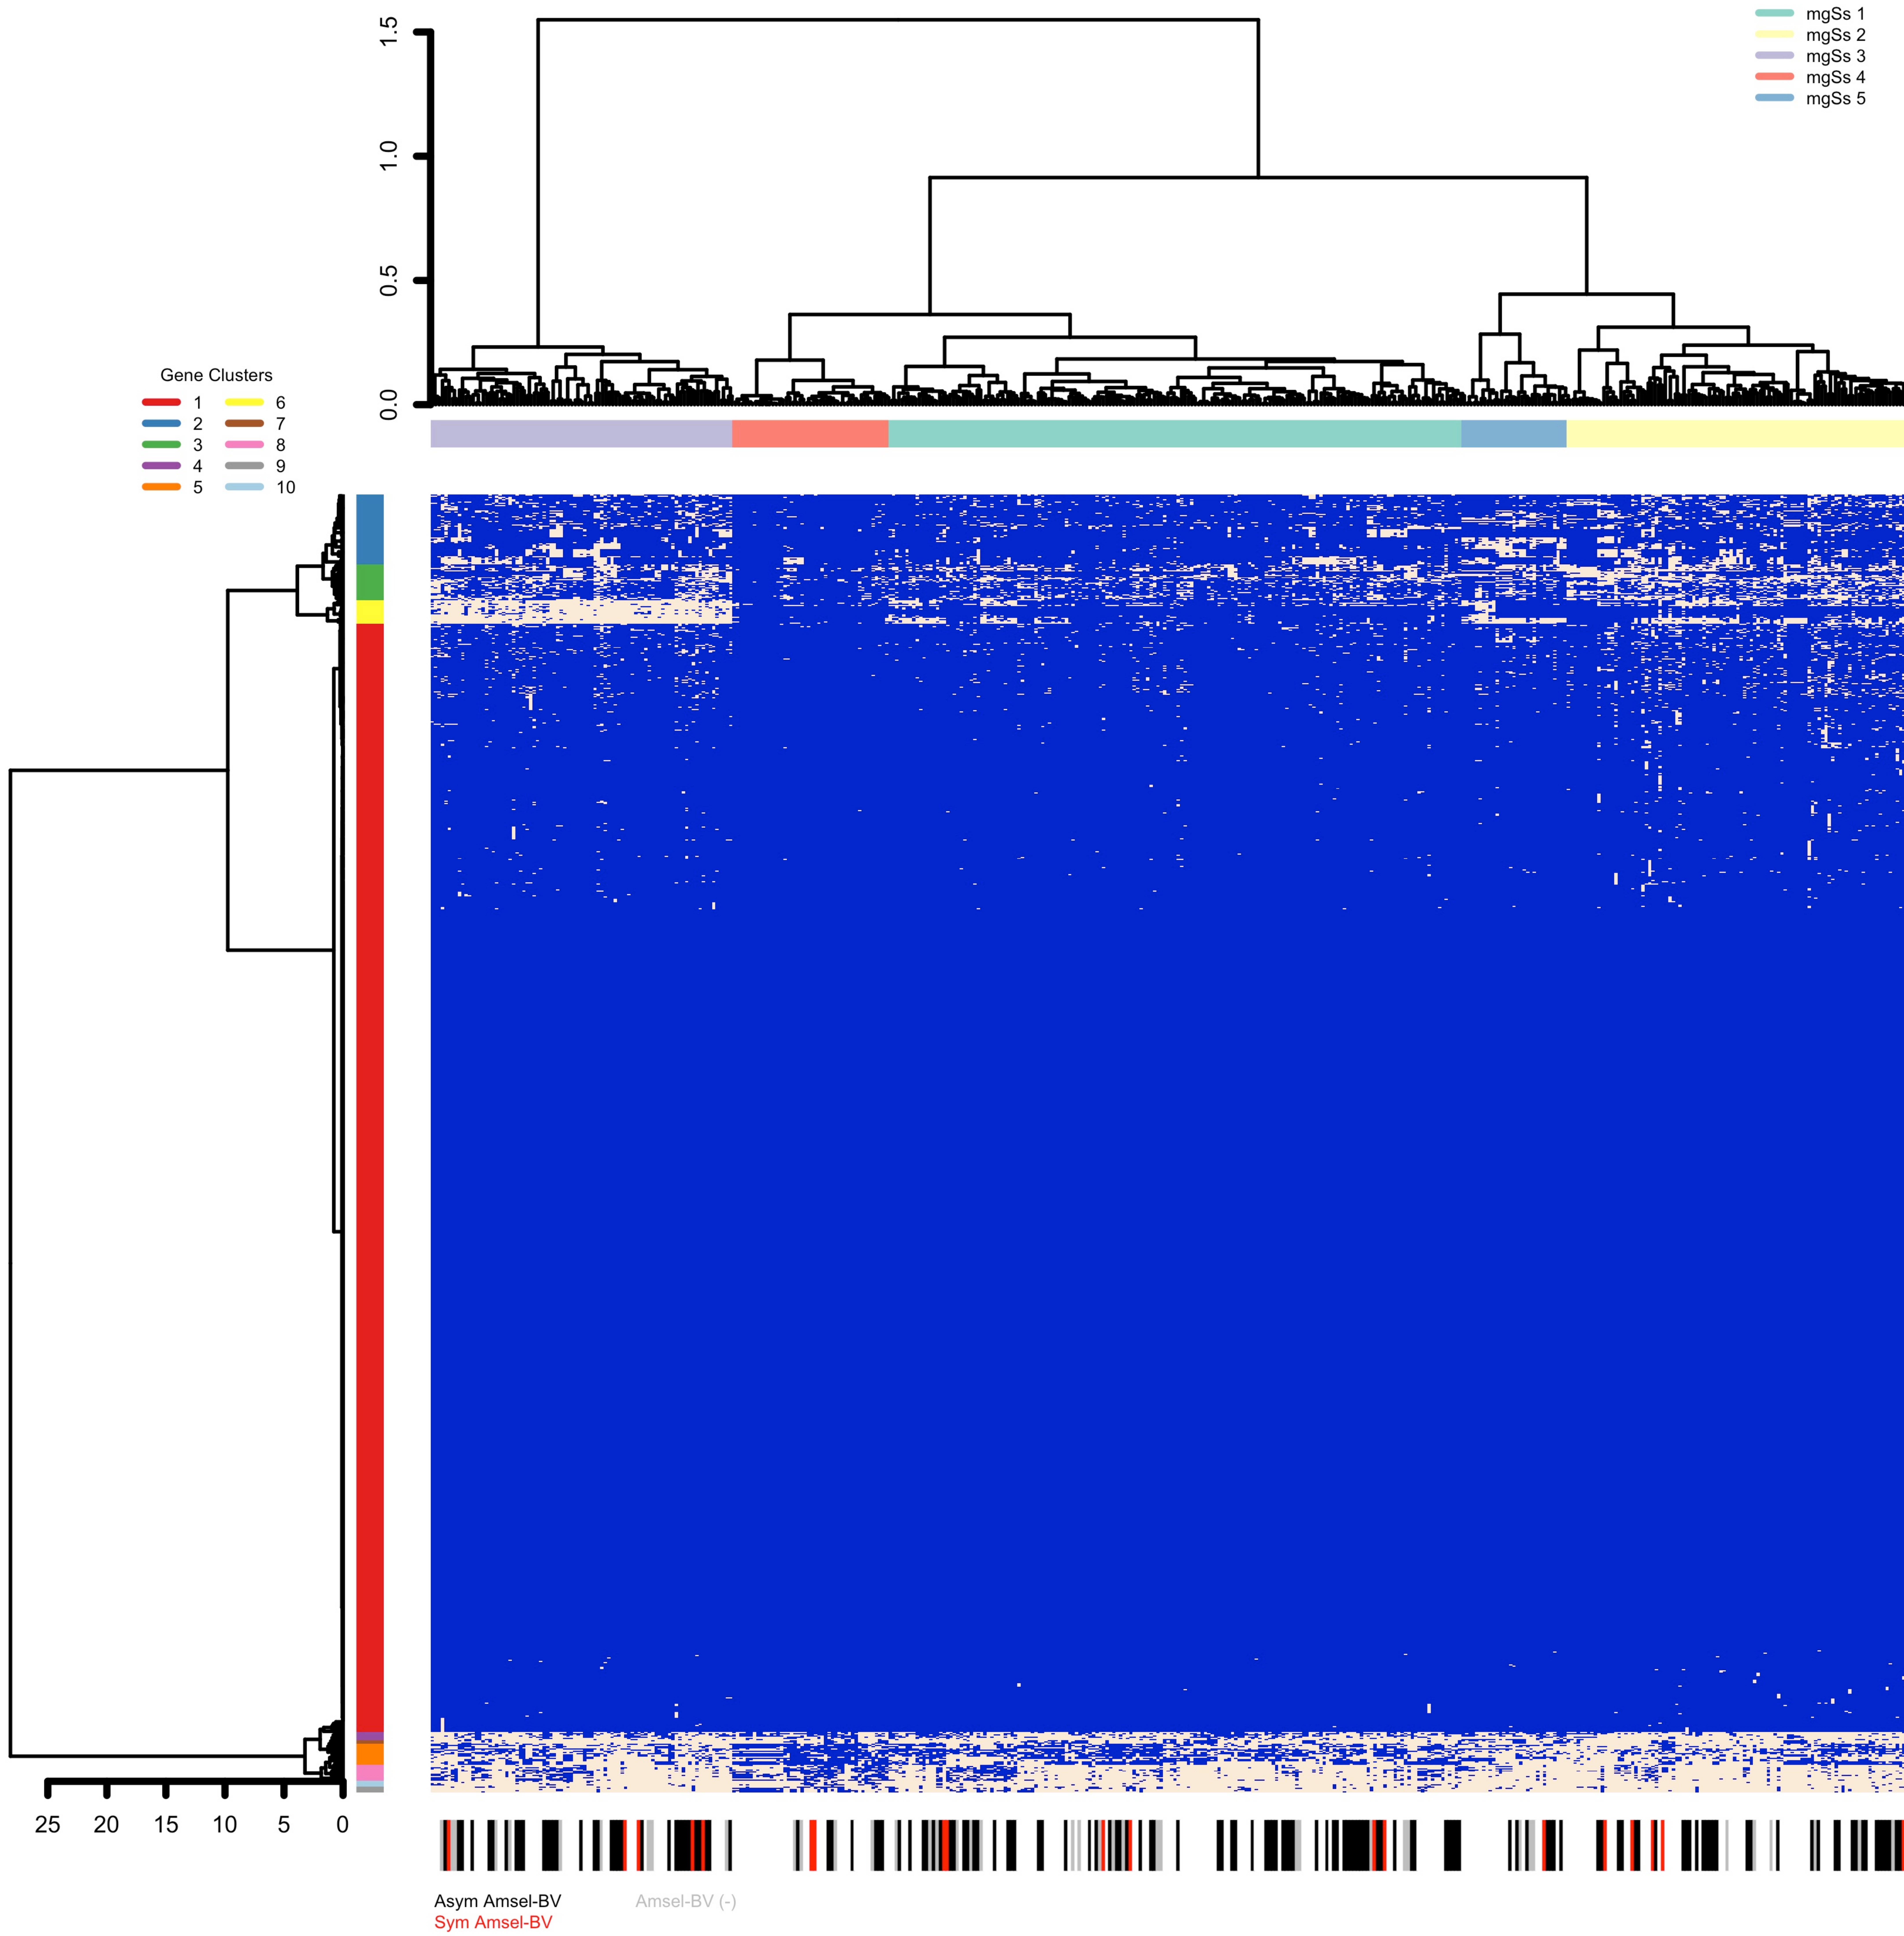

Sneathia sanguinegens mgSs  
Number of Samples=384, Number of Genes=1129

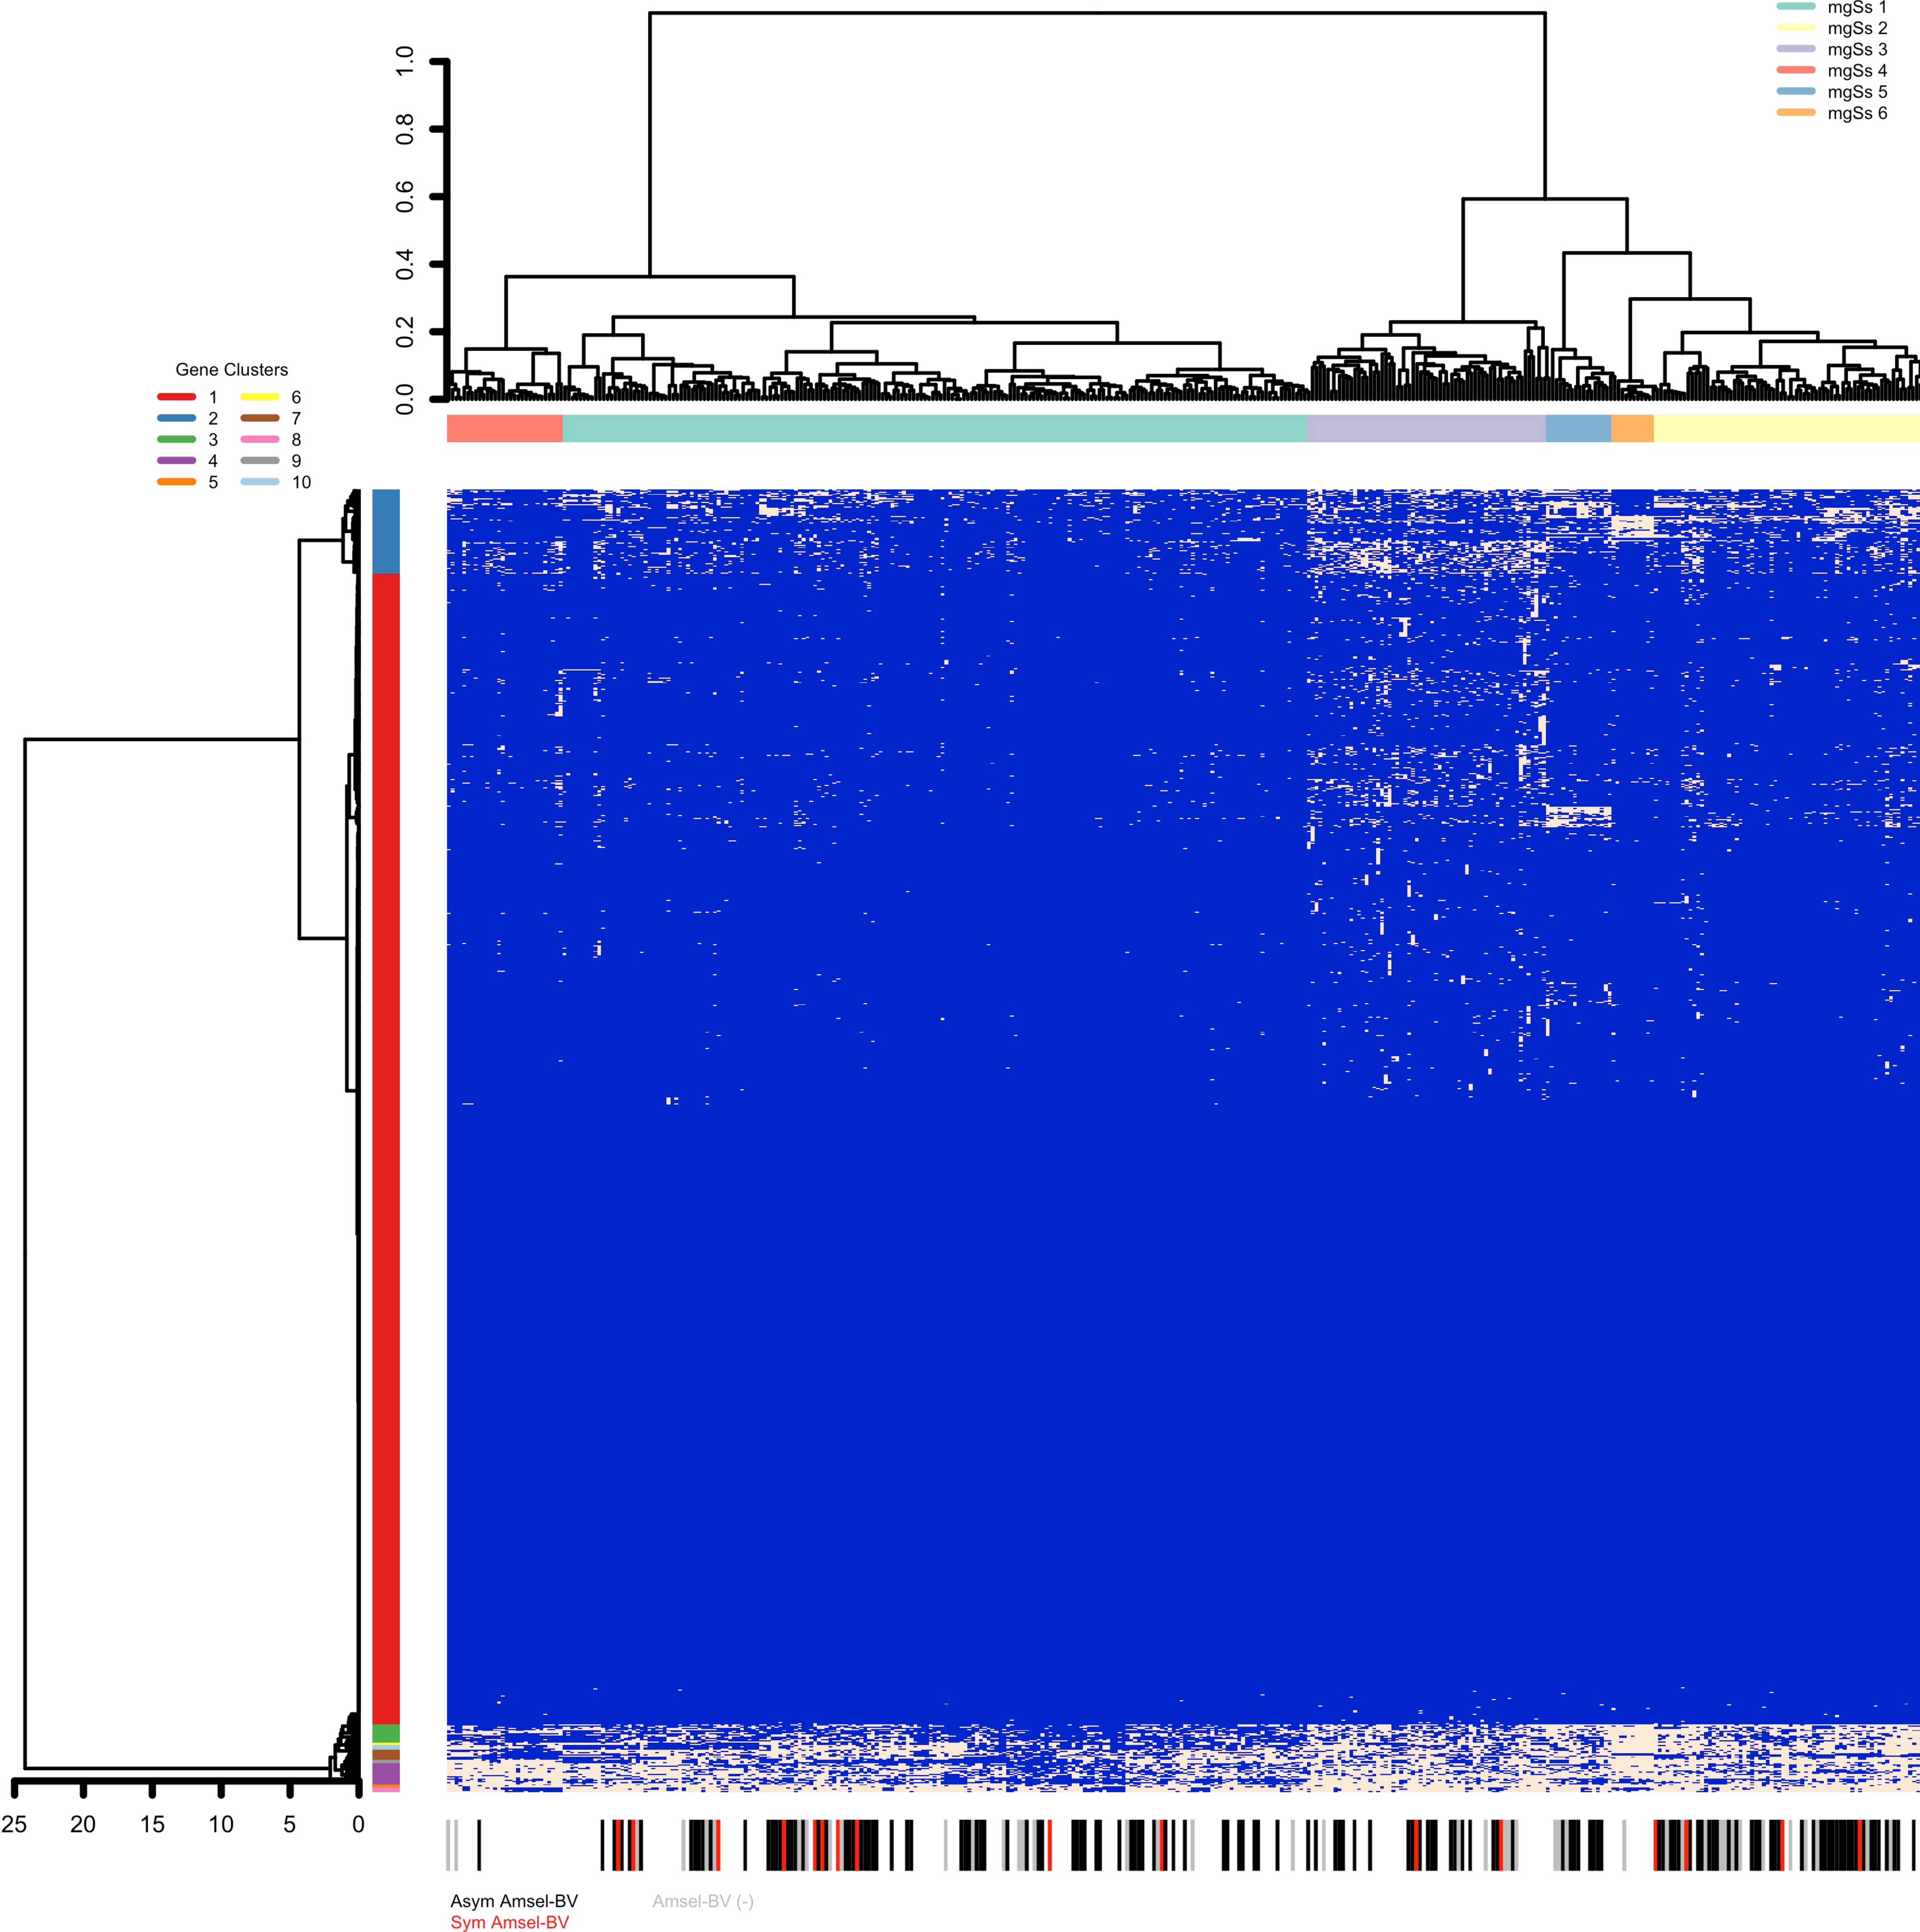

Streptococcus agalactiae mgSs  
Number of Samples=75, Number of Genes=2905

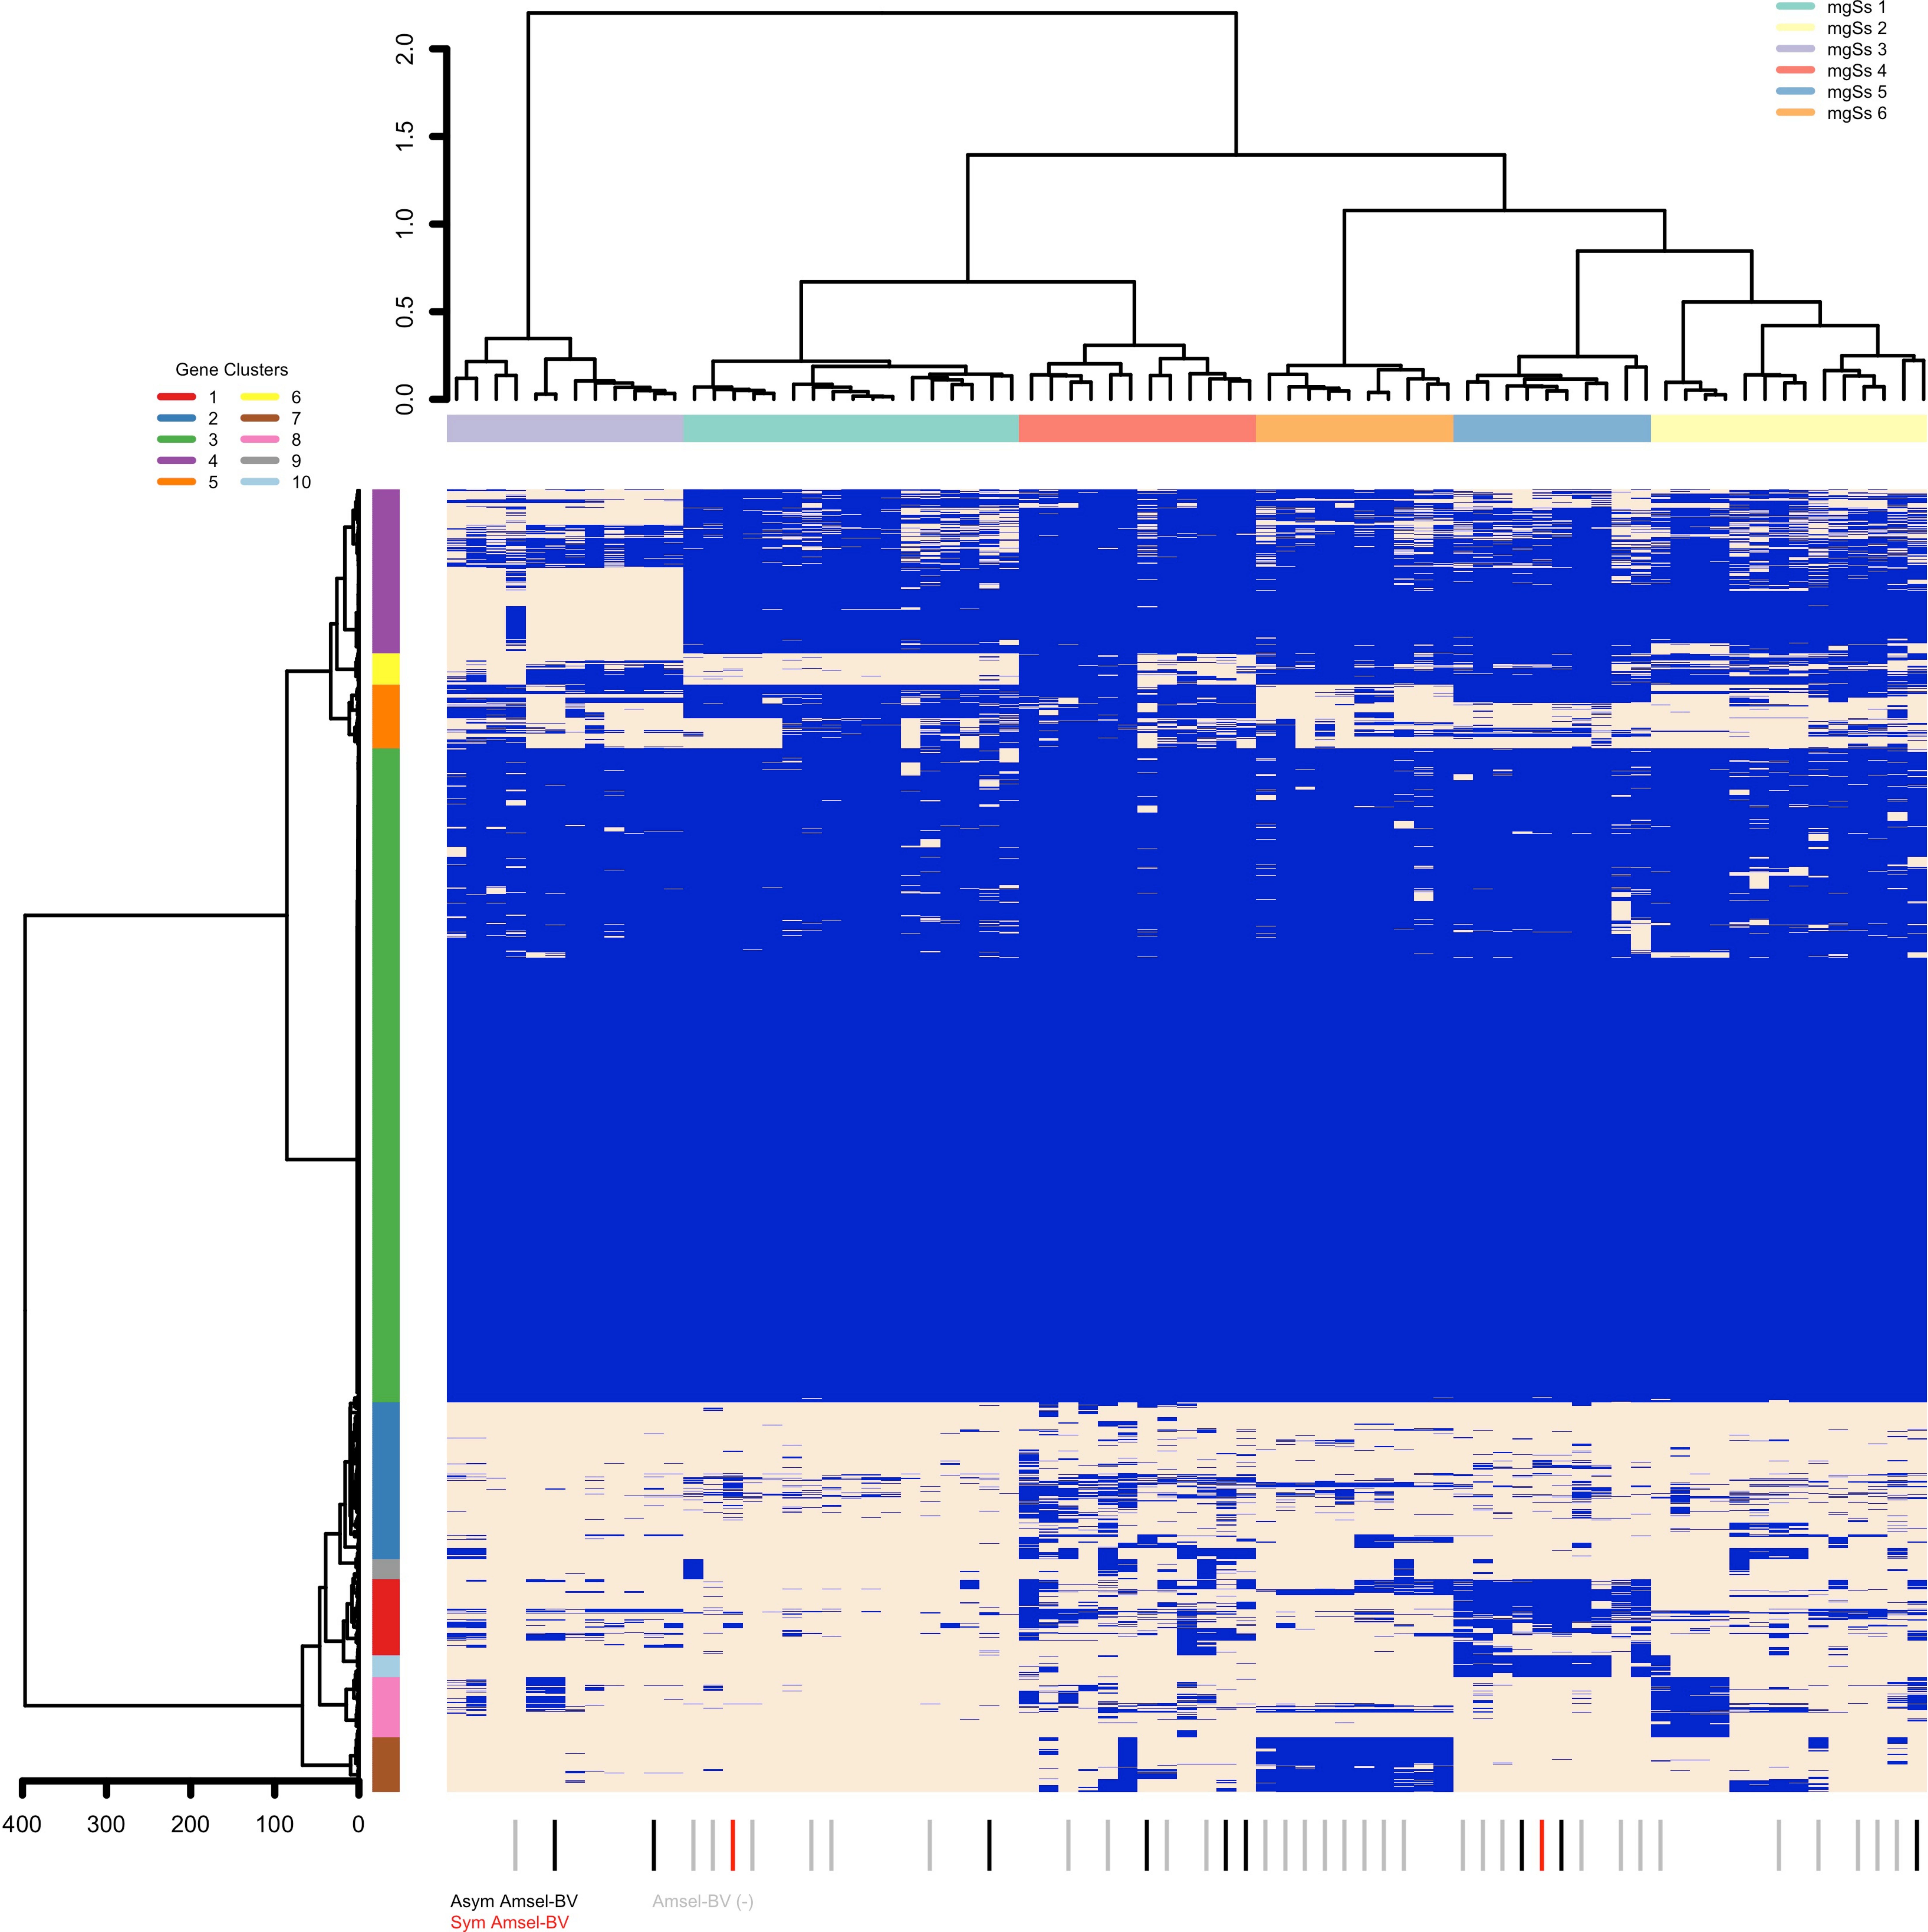

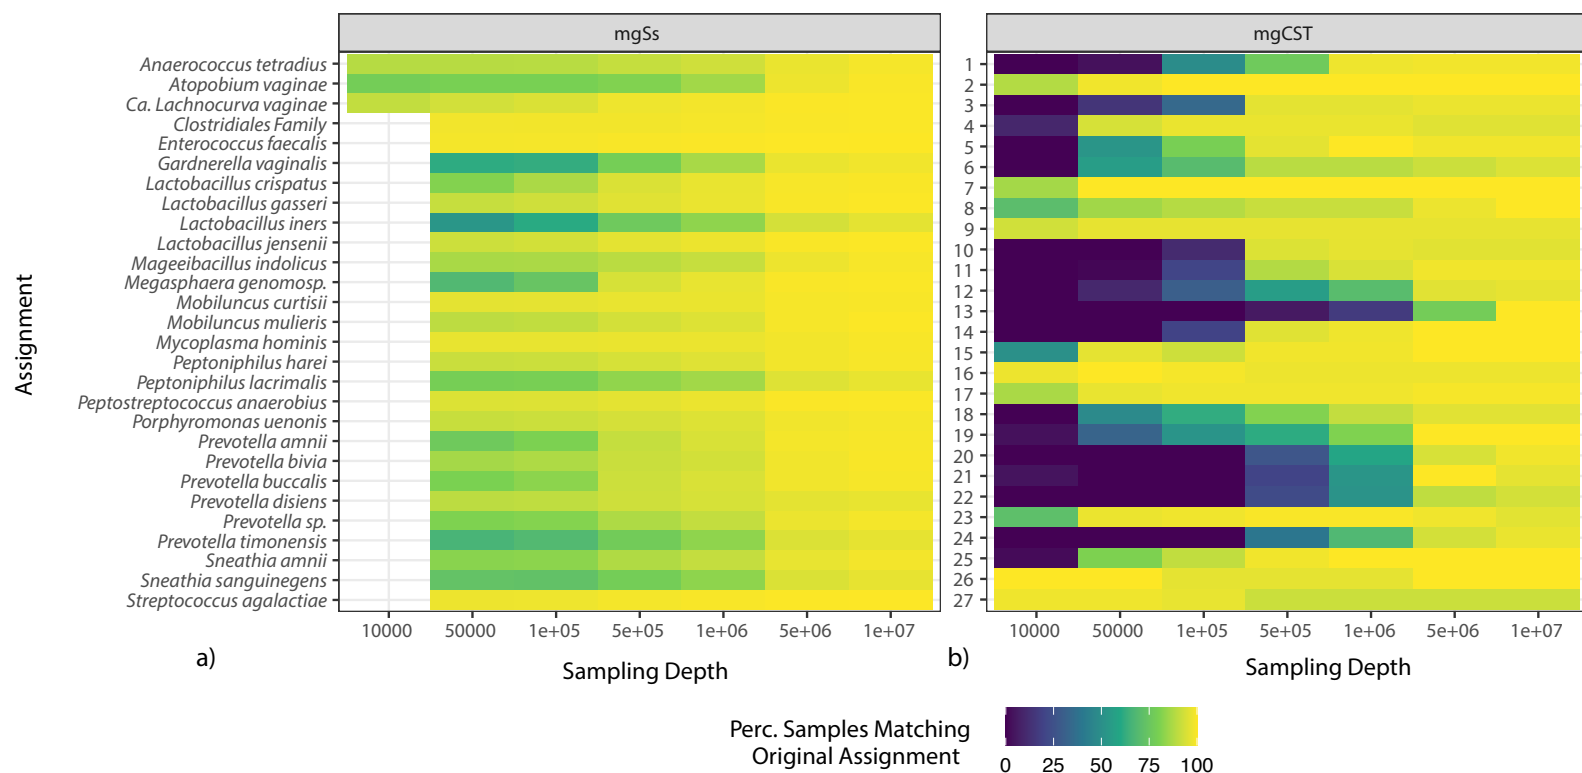

Fig. S10. Metagenomic subspecies (a, mgSs) and metagenomic community state types (b, mgCSTs) may be impacted with sampling (sequencing) depth. A minimum of  $1 \times 10^6$  reads per sample is recommended for mgCST assignment.
